# Supplementary material for: Effects of Substituents on the Photophysical/Photobiological Properties of Mono-Substituted Corroles
Source: MDPI journal article supplement (doi:10.3390/molecules28031385), 2023-02-01
Supplement: s1 [file s1]

## Supplementary information

### Effects of substituents on the photophysical/photobiological properties of mono-substituted corroles

Vitória Barbosa de Souza<sup>1</sup>, Vinícius N. da Rocha<sup>2</sup>, Paulo Cesar Piquini<sup>2</sup>, Otávio Augusto Chaves<sup>3</sup> and Bernardo A. Iglesias<sup>1,\*</sup>

<sup>1</sup>*Department of Chemistry, Bioinorganic and Porphyrinoids Materials Lab, Federal University of Santa Maria, 97105-900, Santa Maria, RS, Brazil*

<sup>2</sup>*Department of Physics, Federal University of Santa Maria, 97105-900, Santa Maria, RS, Brazil*

<sup>3</sup>*CQC-IMS, Department of Chemistry, University of Coimbra, Rua Larga, 3004-535, Coimbra, Portugal*

\*Correspondence: bernardopgq@gmail.com; bernardo.iglesias@ufsm.br (B.A.I.)

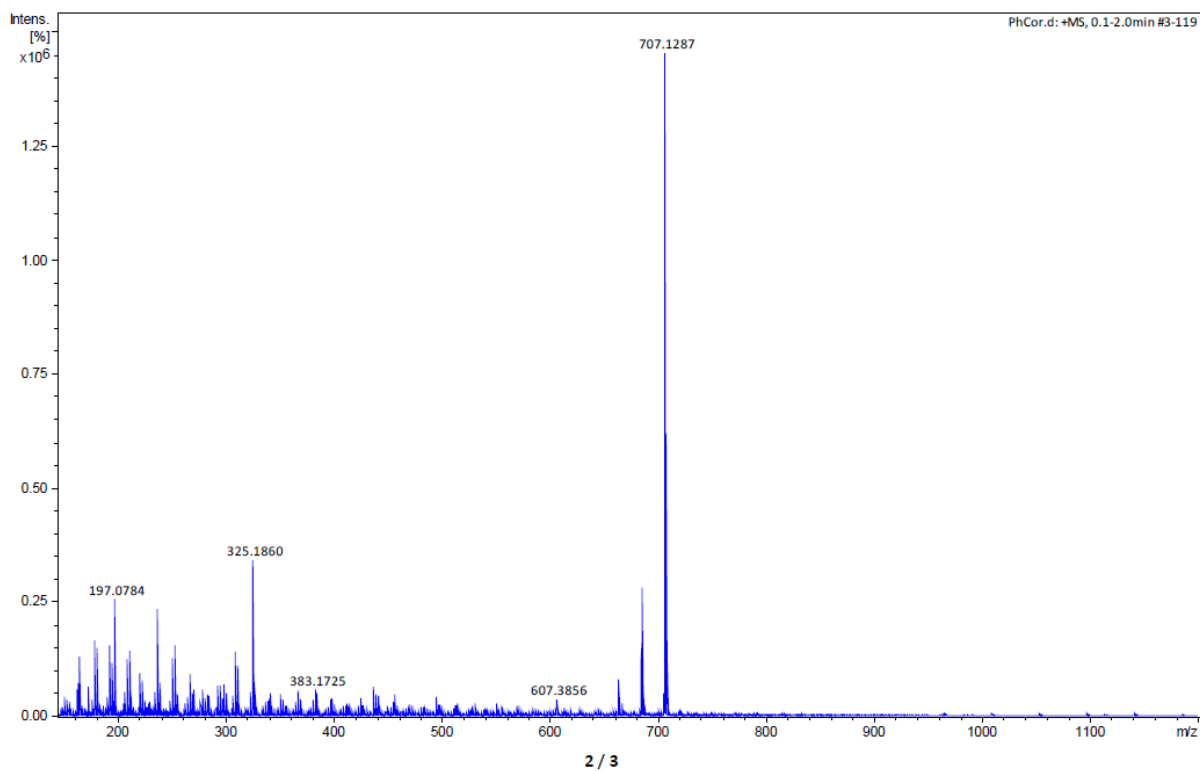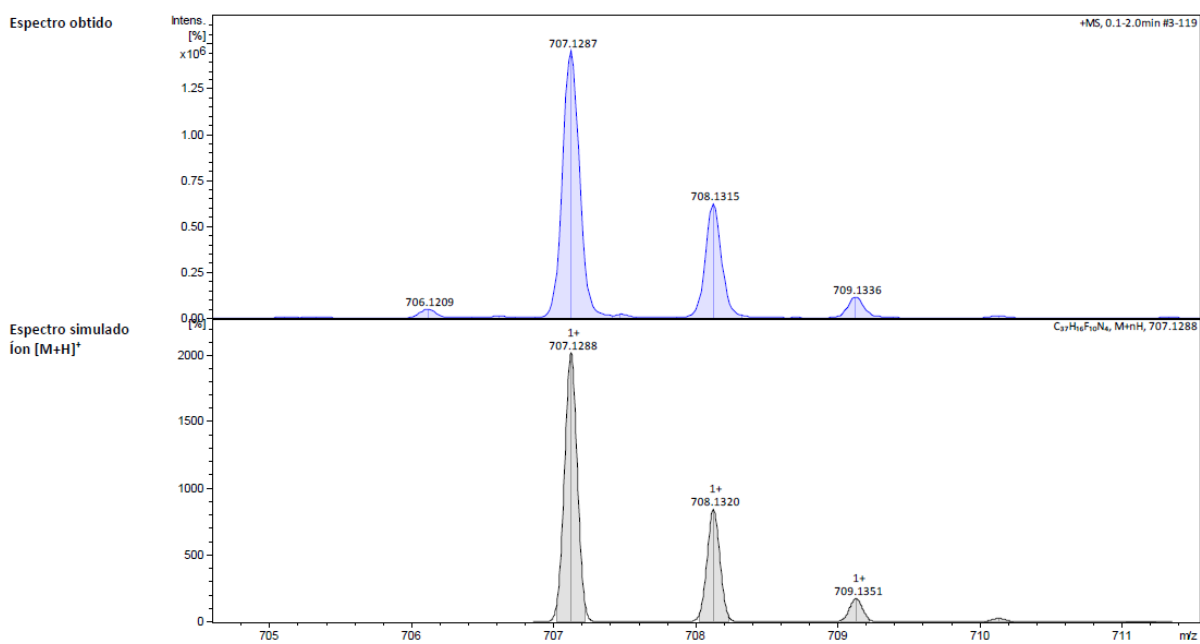

**Figure S1.** HRMS-ESI(+) mass spectrum of corrole **1**.

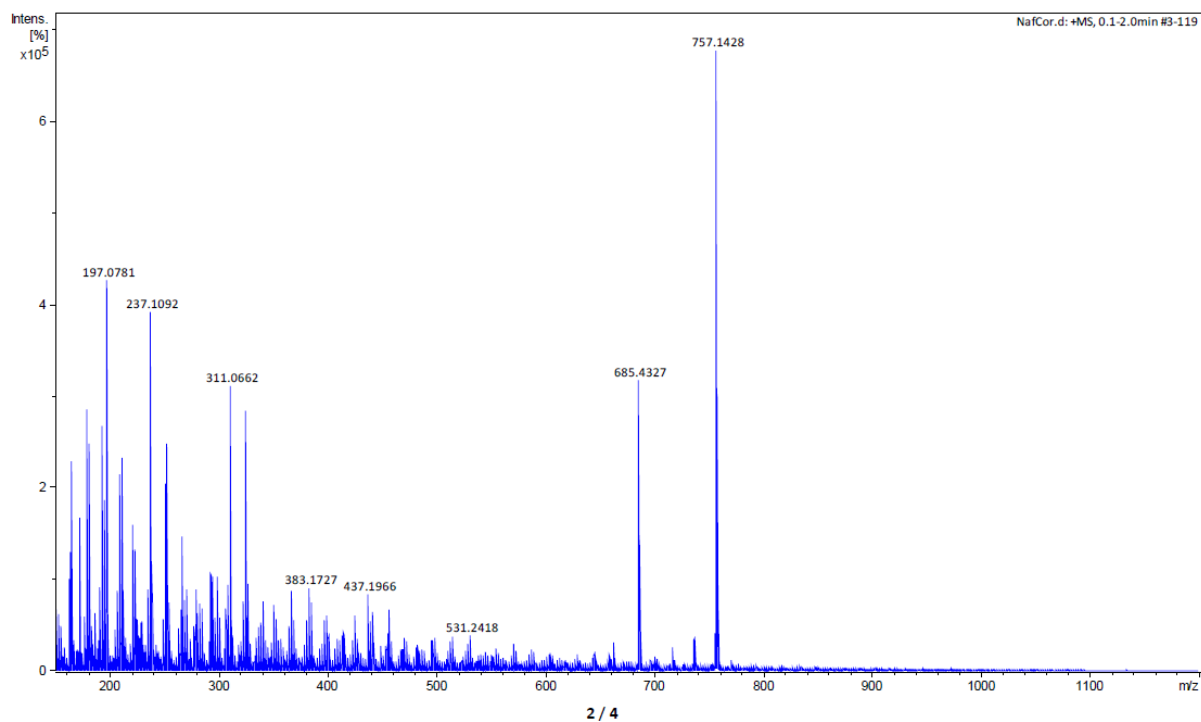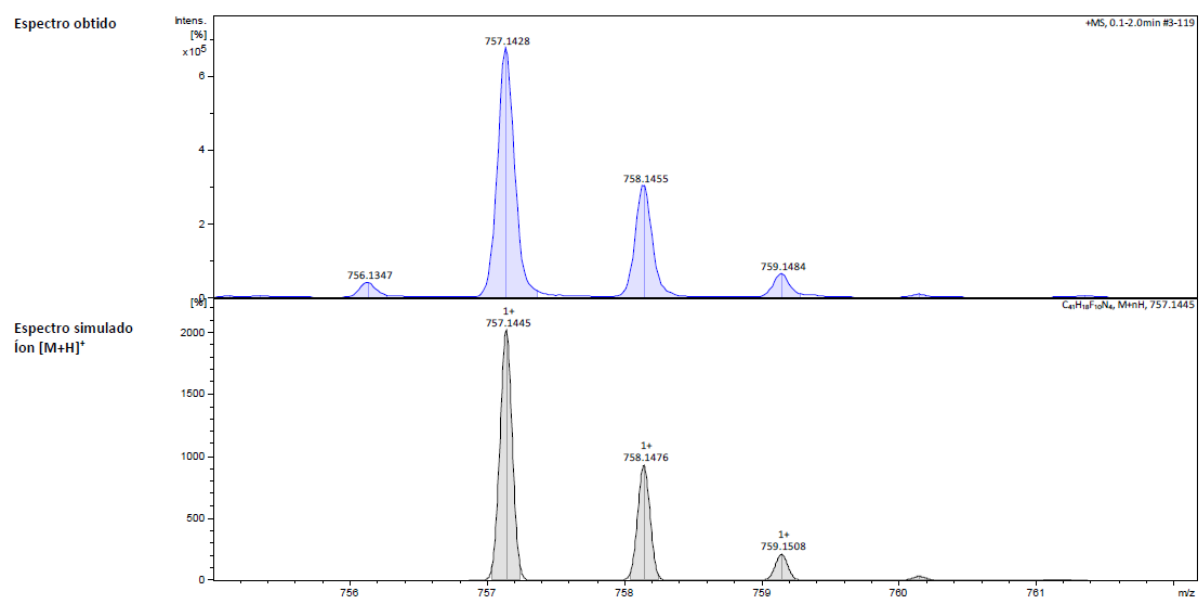

**Figure S2.** HRMS-ESI(+) mass spectrum of corrole **2**.

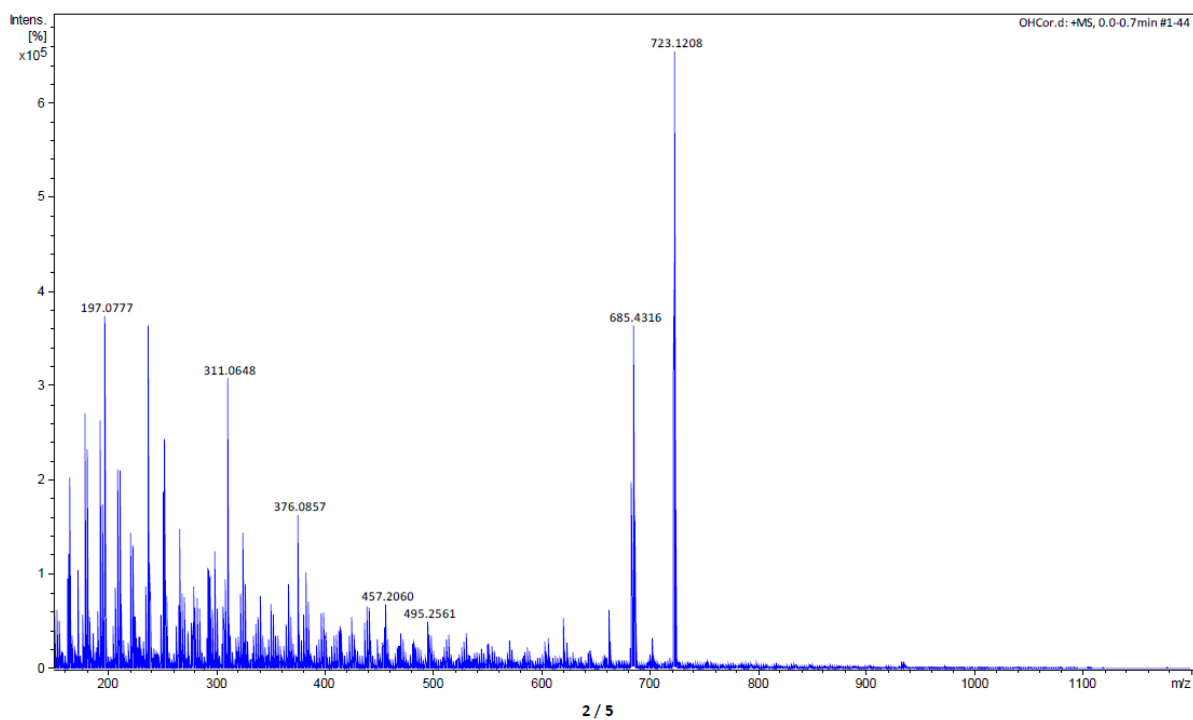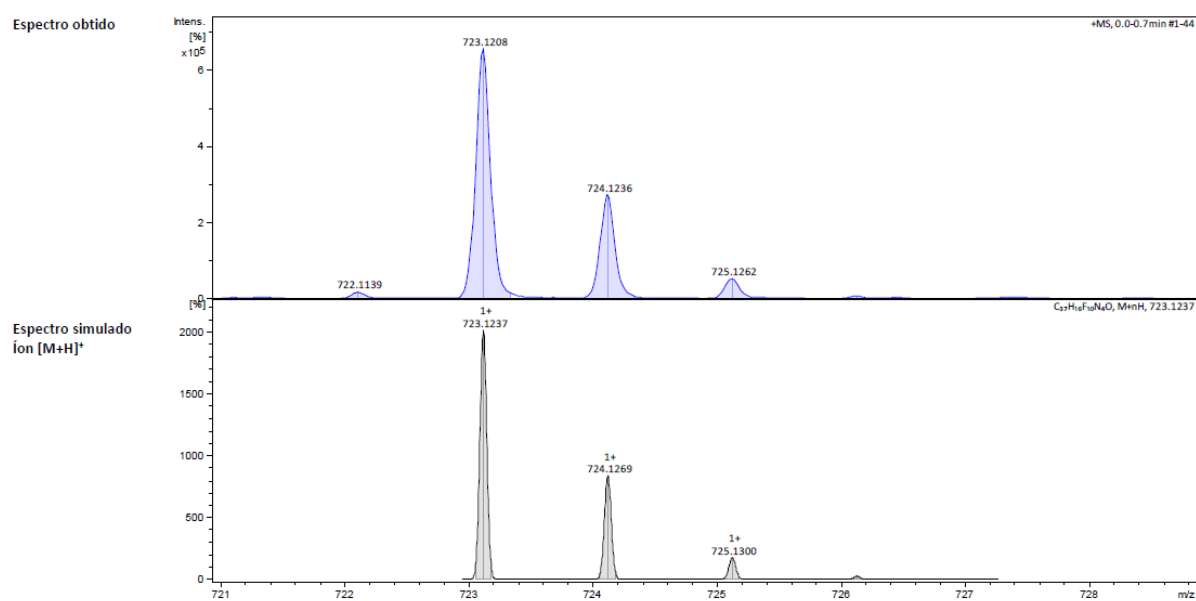

**Figure S3.** HRMS-ESI(+) mass spectrum of corrole 3.

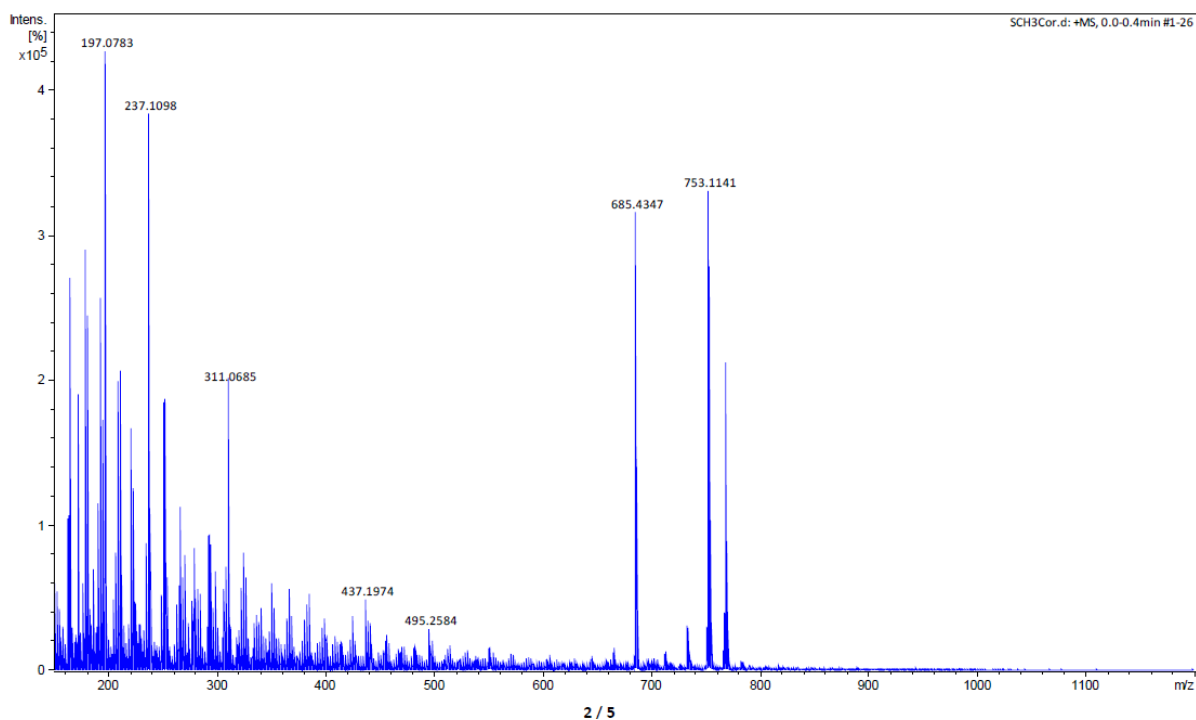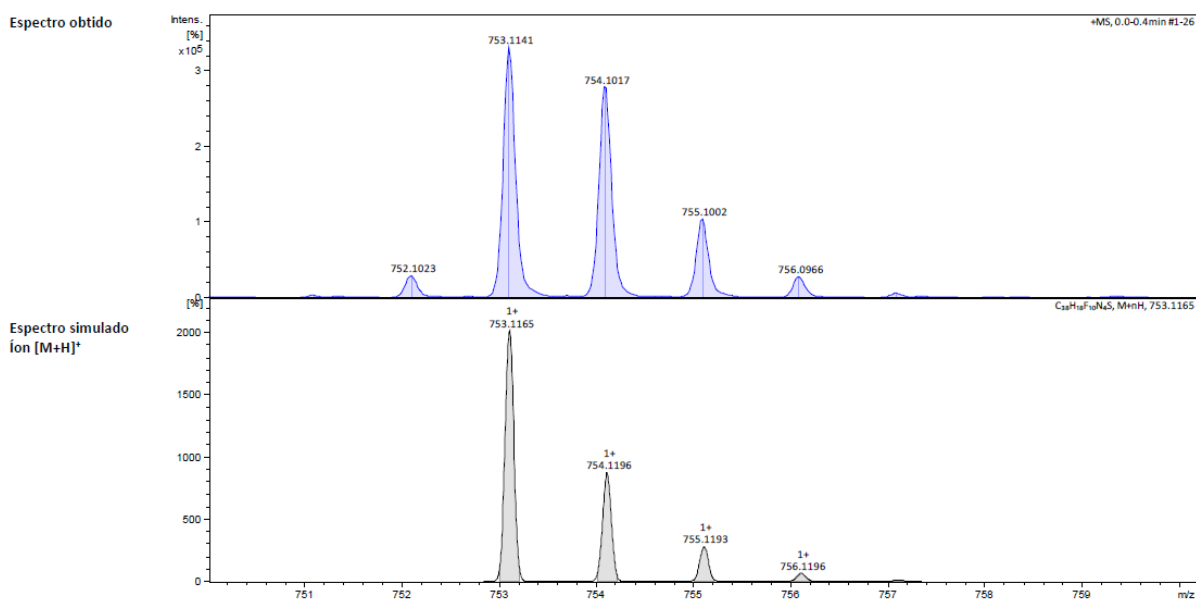

**Figure S4.** HRMS-ESI(+) mass spectrum of corrole **4**.

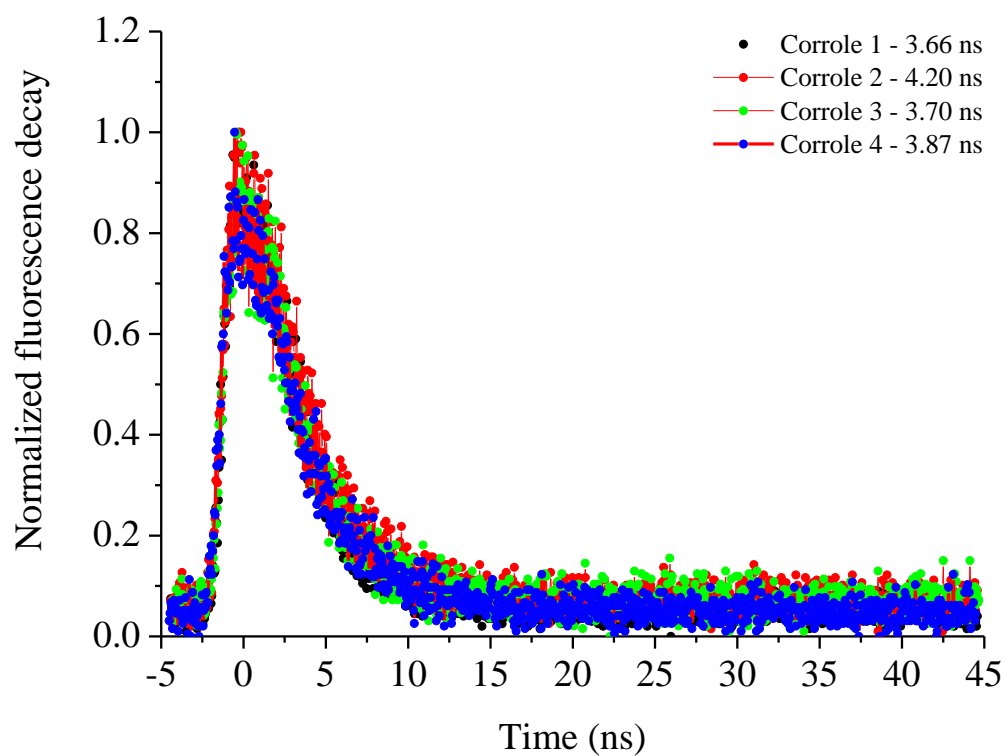

**Figure S5.** Normalized fluorescence decays of corroles **1-4** in DCM solution.

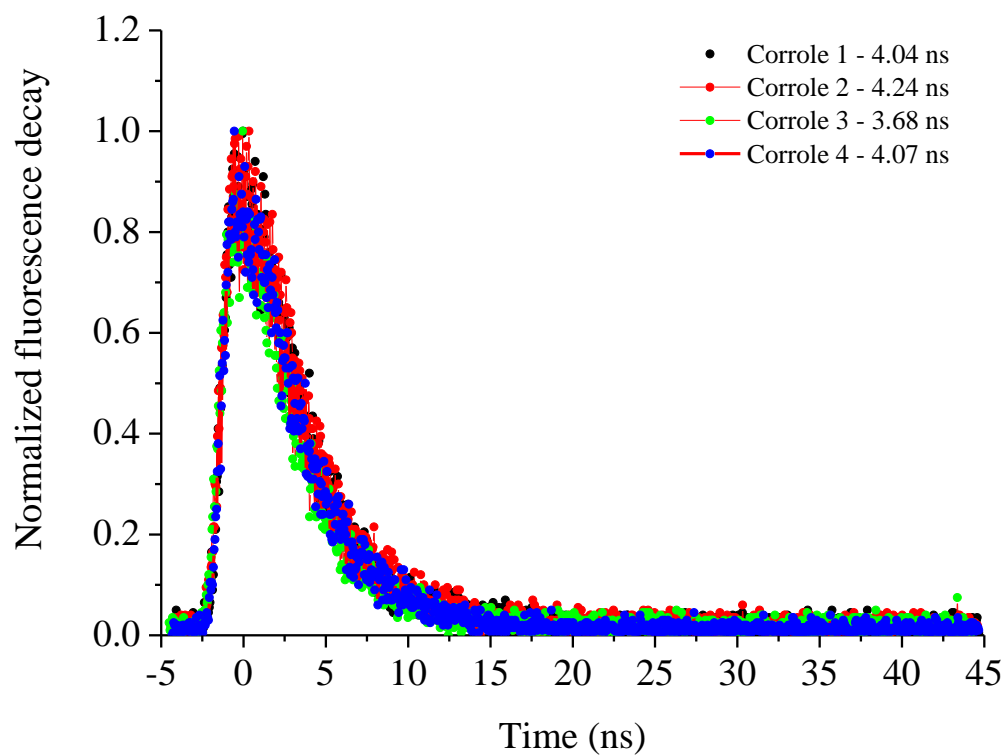

**Figure S6.** Normalized fluorescence decays of corroles **1-4** in ACN solution.

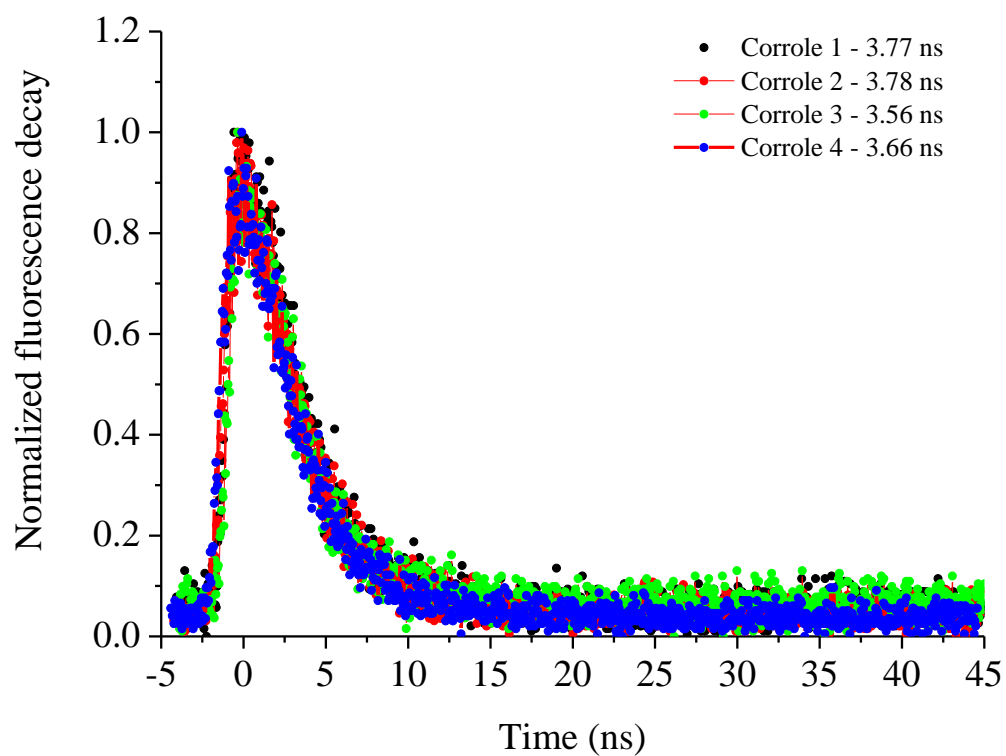

**Figure S7.** Normalized fluorescence decays of corroles **1-4** in MeOH solution.

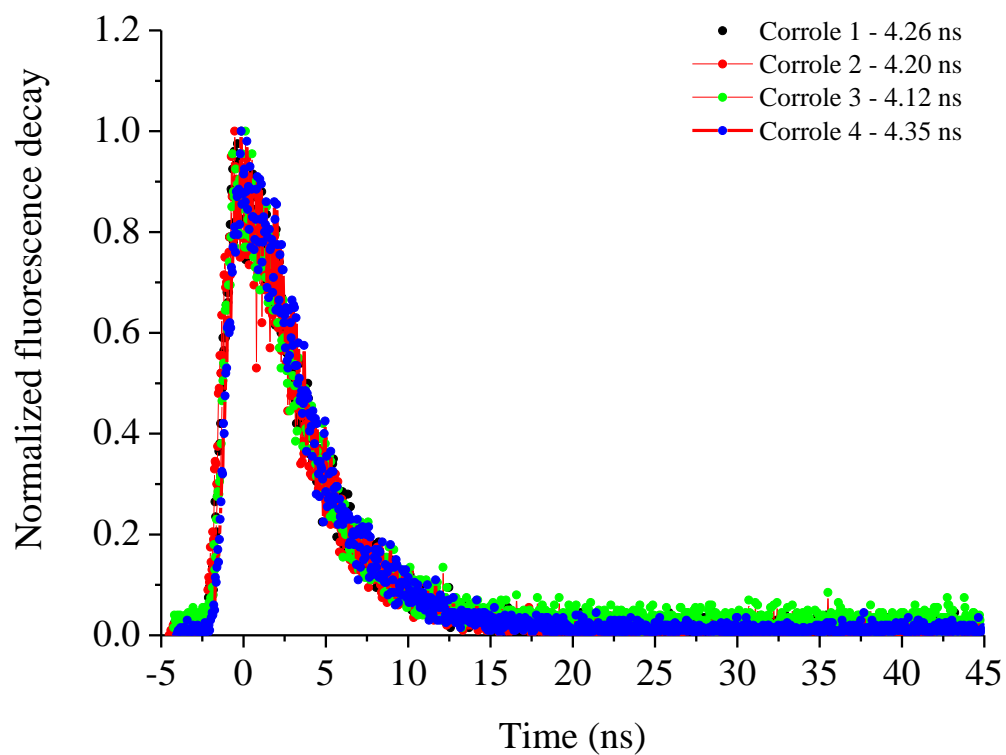

**Figure S8.** Normalized fluorescence decays of corroles **1-4** in DMSO solution.

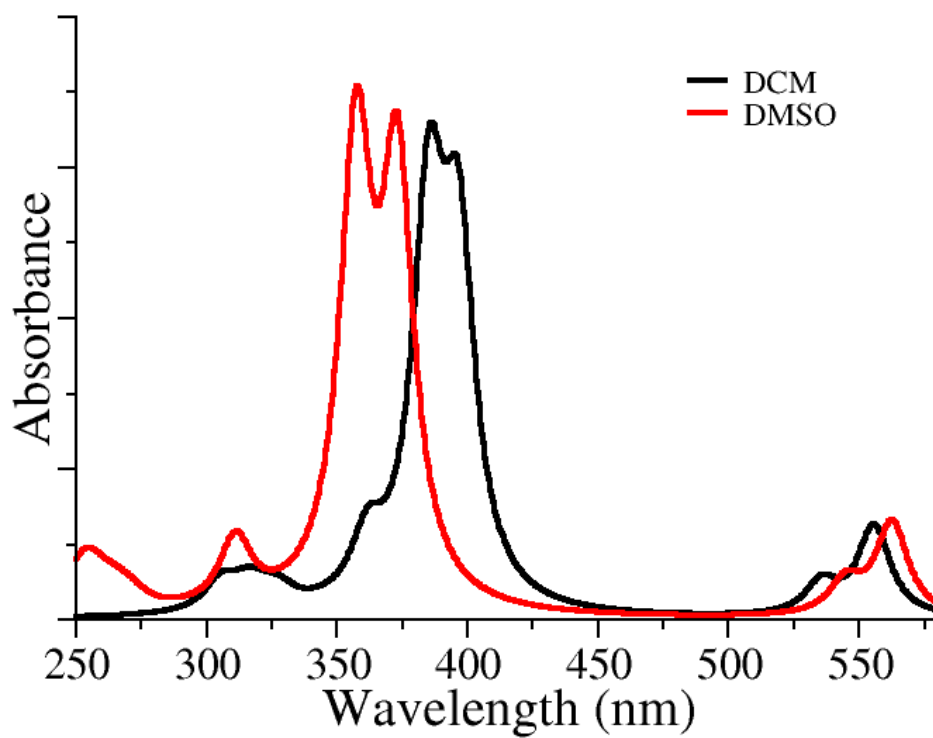

**Figure S9.** Theoretical optical absorption spectra in DCM and DMSO of corrole 1.

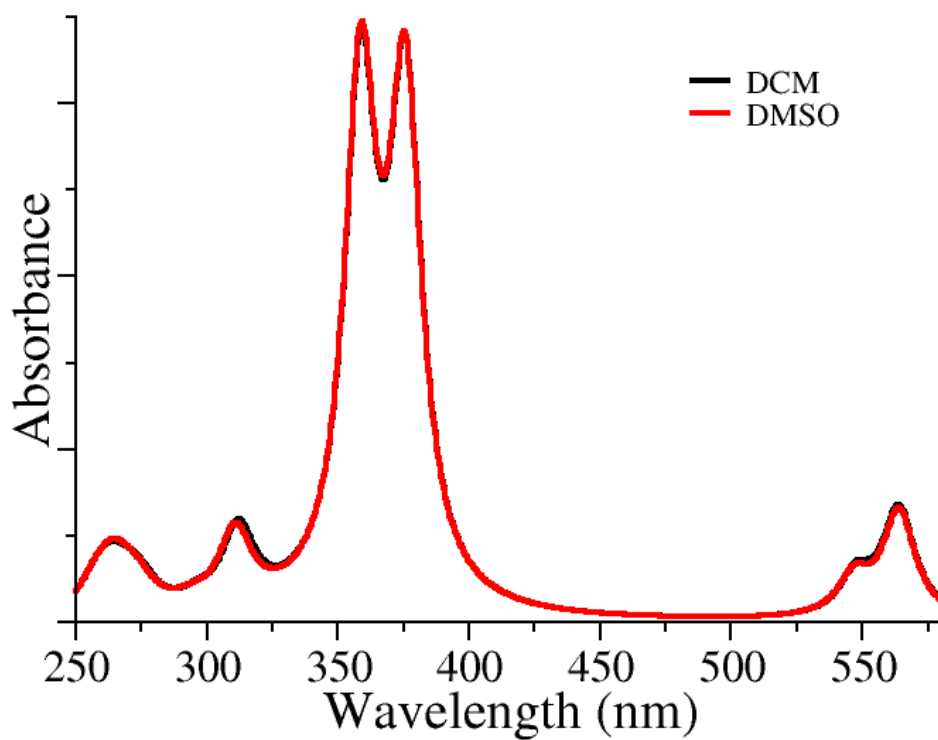

**Figure S10.** Theoretical optical absorption spectra in DCM and DMSO of corrole 2.



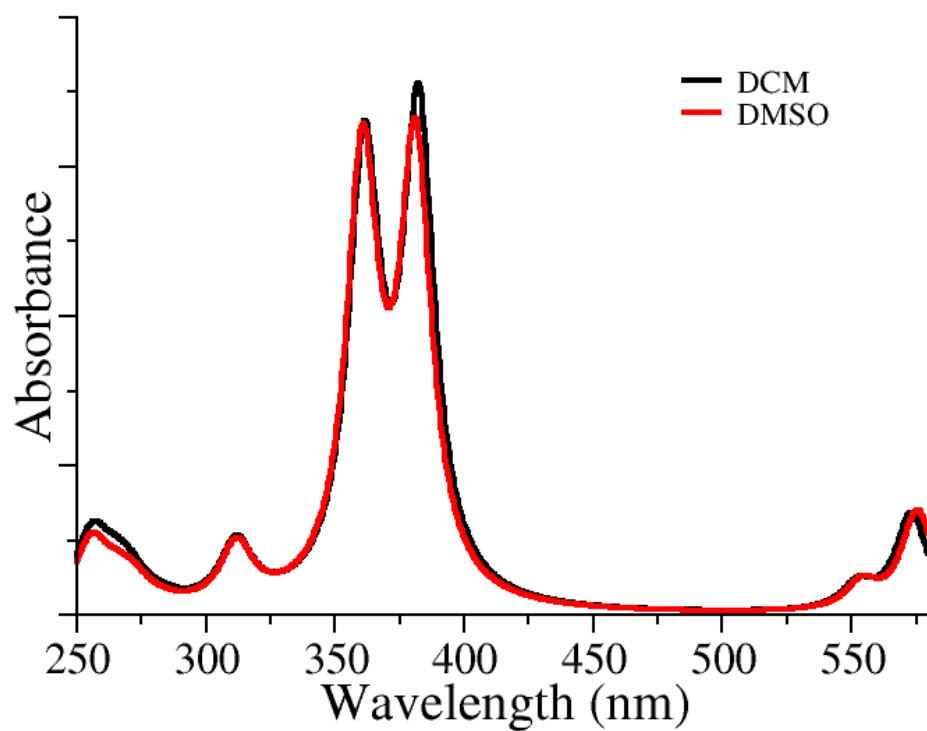

**Figure S11.** Theoretical optical absorption spectra in DCM and DMSO of corrole 3.

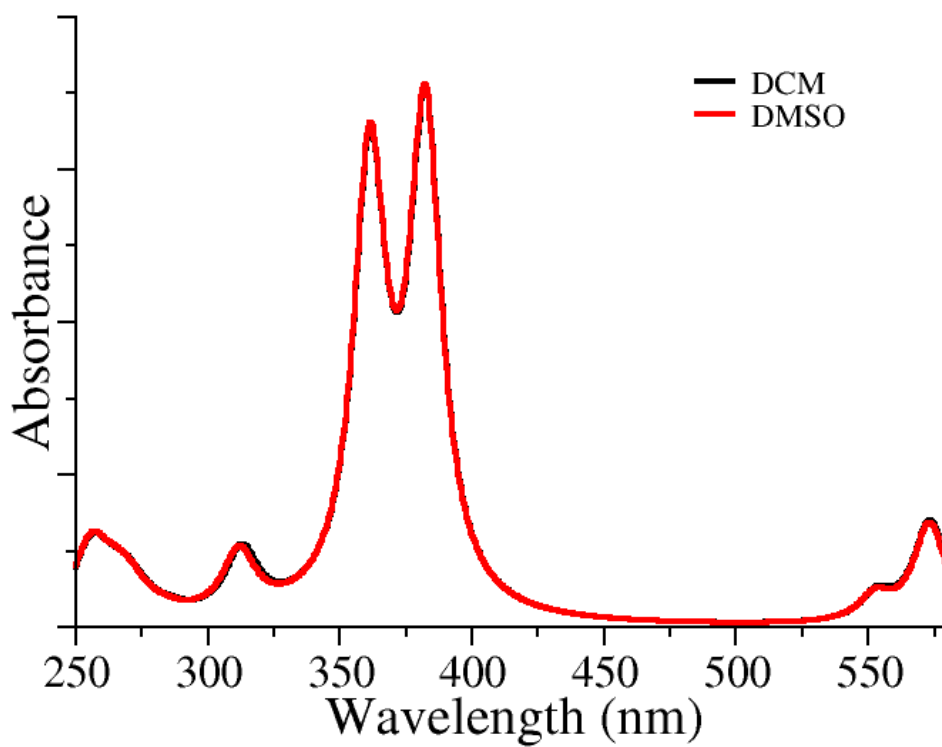

**Figure S12.** Theoretical optical absorption spectra in DCM and DMSO of corrole 4.

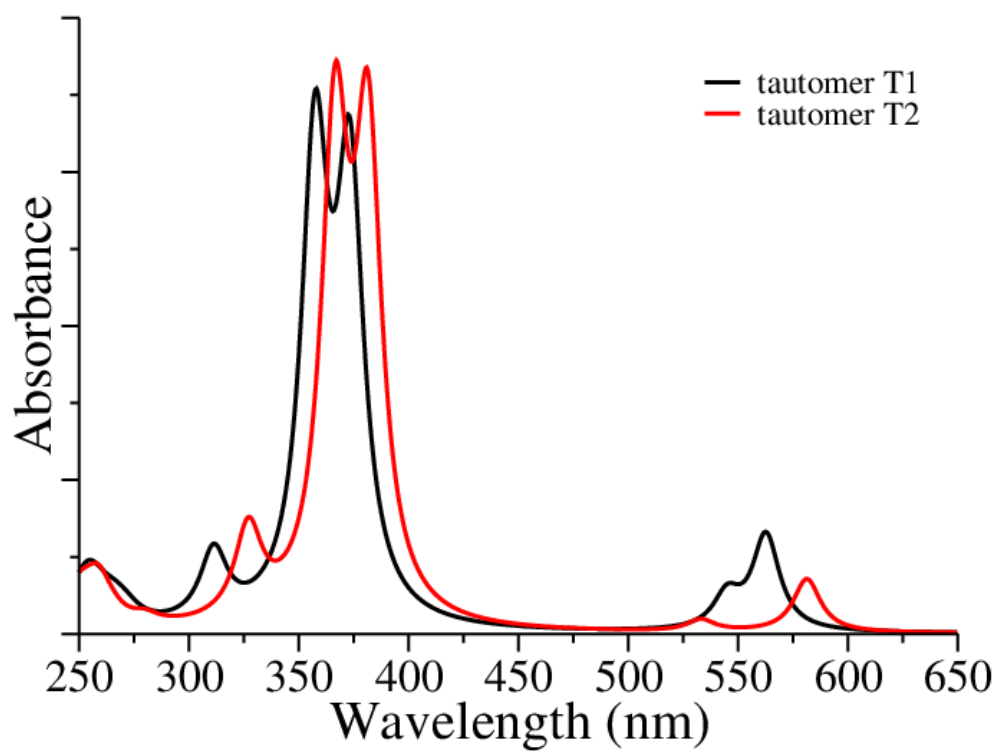

**Figure S13.** Theoretical optical absorption spectra in DMSO of tautomeric states of corrole 1.

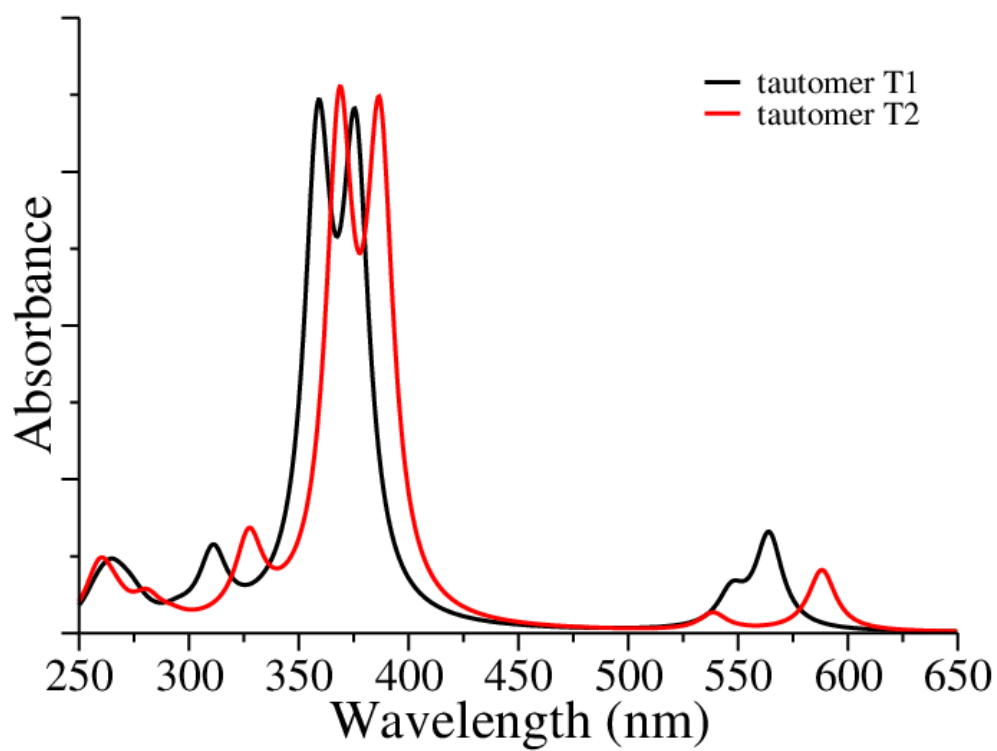

**Figure S14.** Theoretical optical absorption spectra in DMSO of tautomeric states of corrole 2.

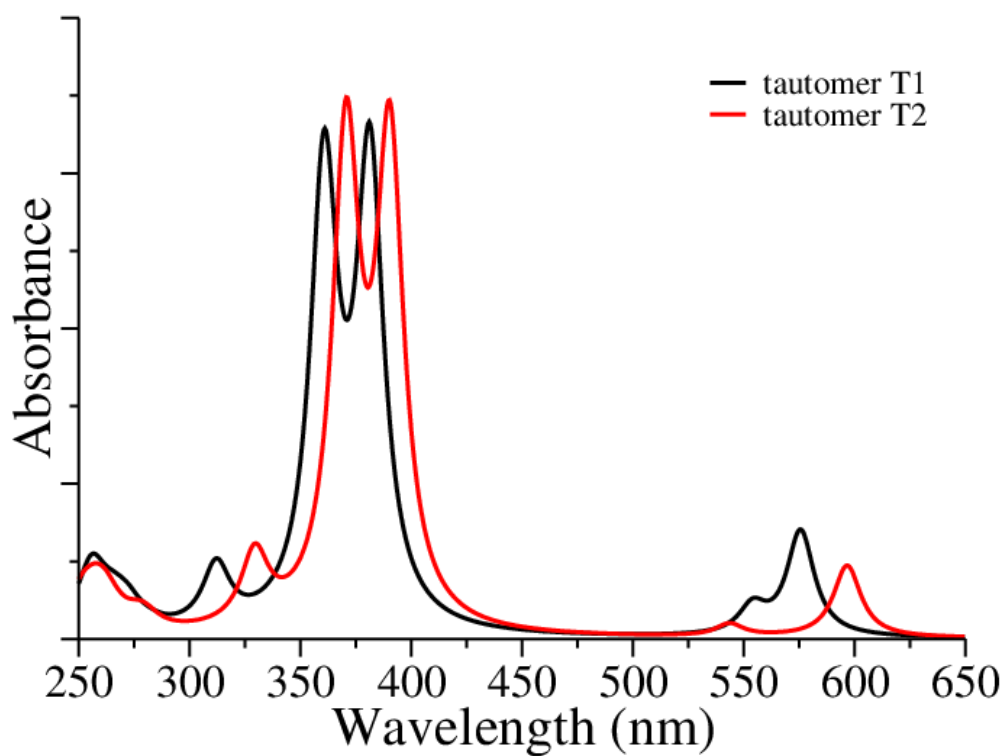

**Figure S15.** Theoretical optical absorption spectra in DMSO of tautomeric states of corrole **3**.

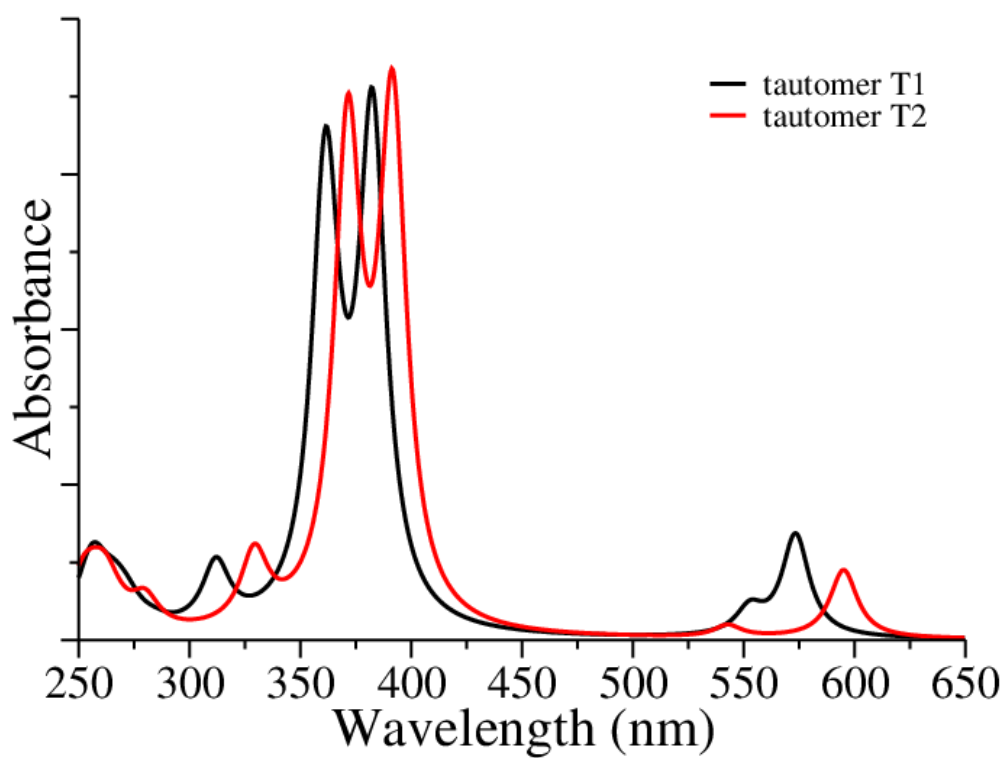

**Figure S16.** Theoretical optical absorption spectra in DMSO of tautomeric states of corrole **4**.

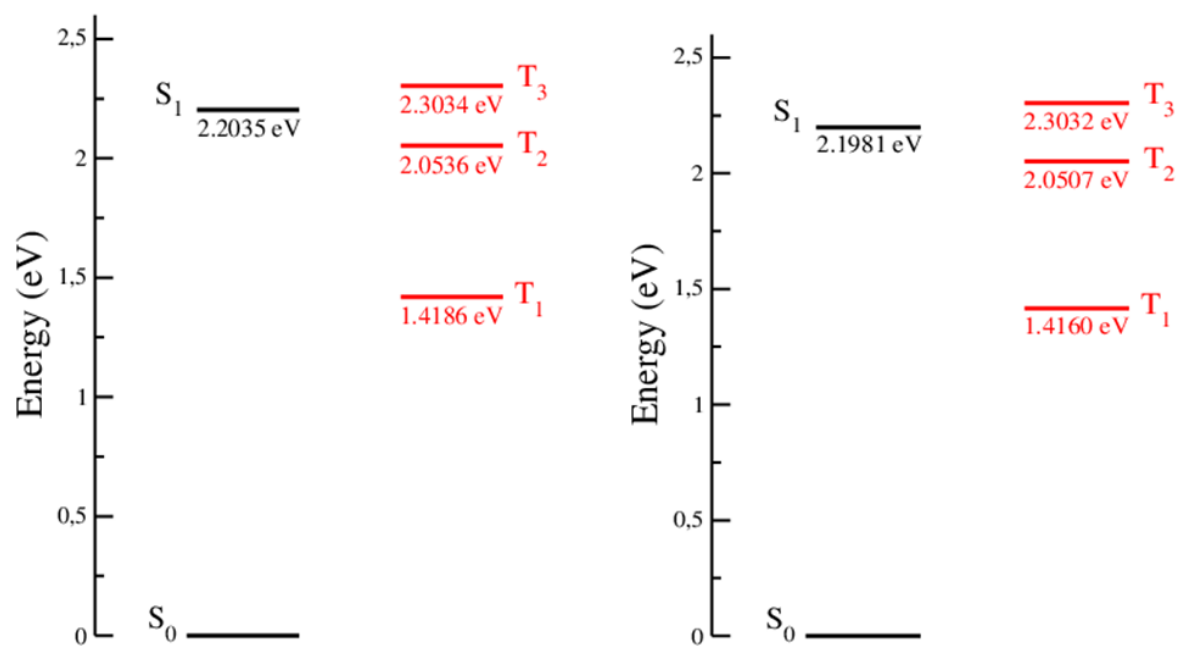

**Figure S17.** Total energies of the  $S_1$  and  $T_1$ ,  $T_2$  and  $T_3$  excited states, relative to the ground state  $S_0$  of corroles **1** (left panel), and **2** (right panel).

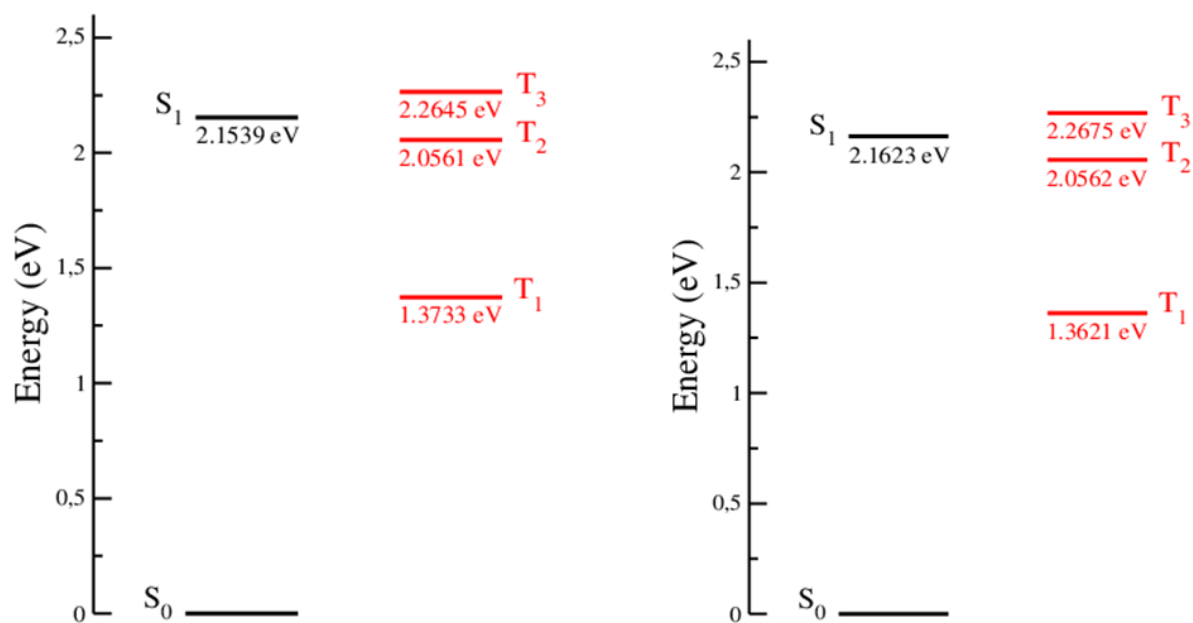

**Figure S18.** Total energies of the  $S_1$  and  $T_1$ ,  $T_2$  and  $T_3$  excited states, relative to the ground state  $S_0$  of corroles **3** (left panel), and **4** (right panel).

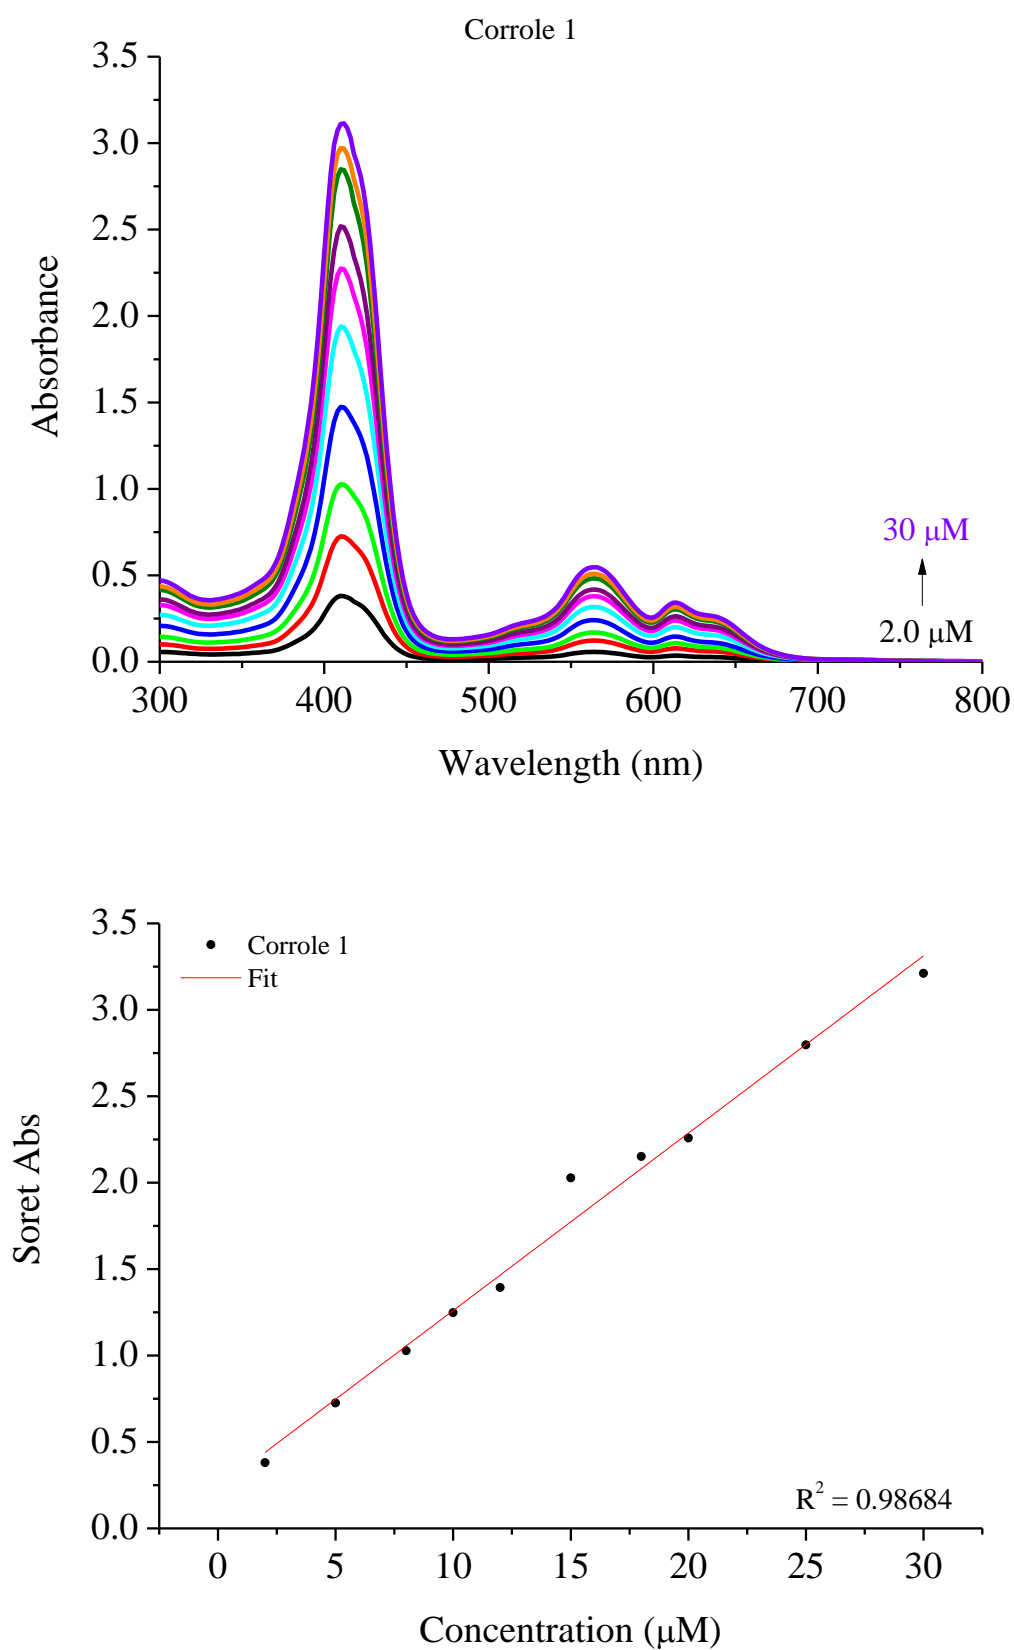

**Figure S19.** (up) Aggregation behavior of corrole 1 in DCM solution and (down)  $\text{Abs}_{\text{Soret}}$  versus concentration plot.

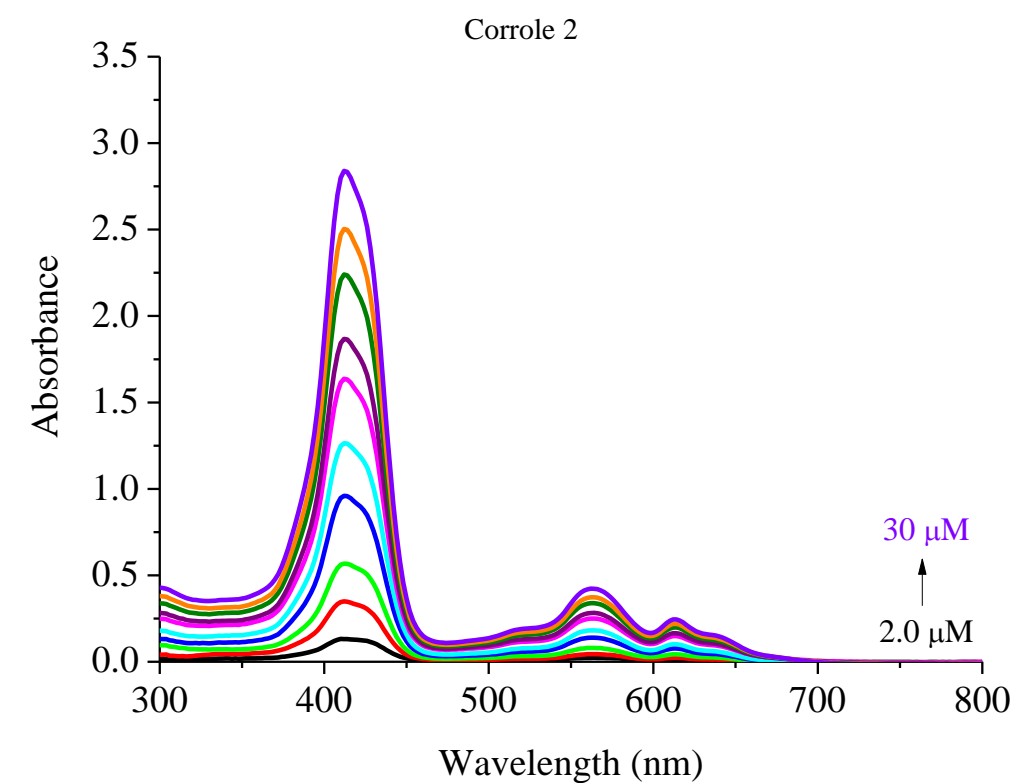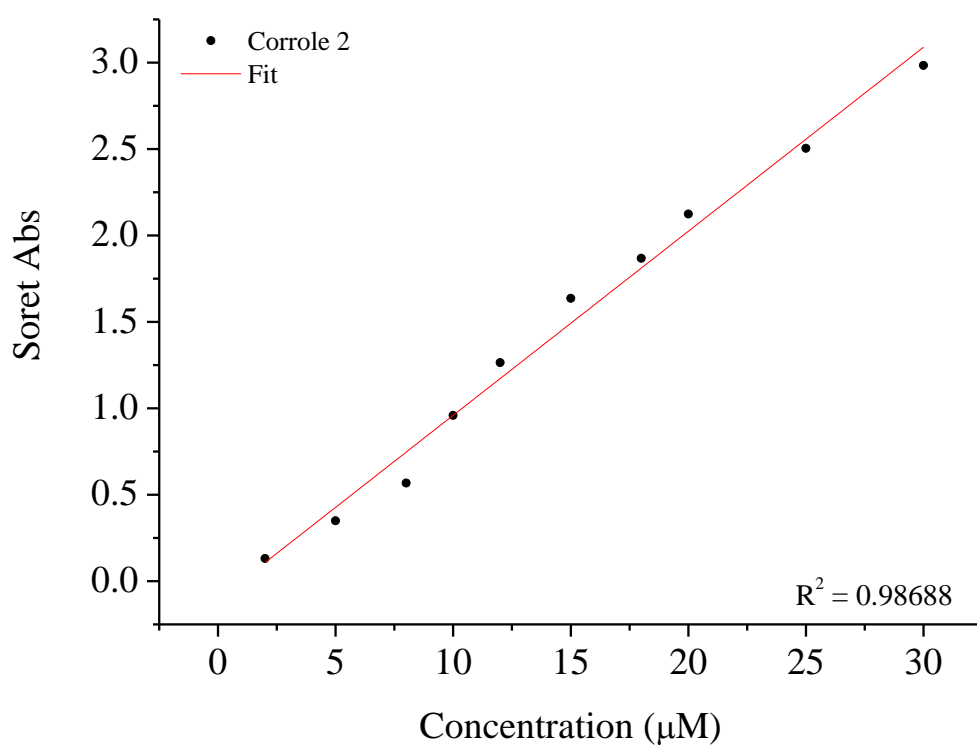

**Figure S20.** (up) Aggregation behavior of corrole 2 in DCM solution and (down)  $\text{Abs}_{\text{Soret}}$  versus concentration plot.

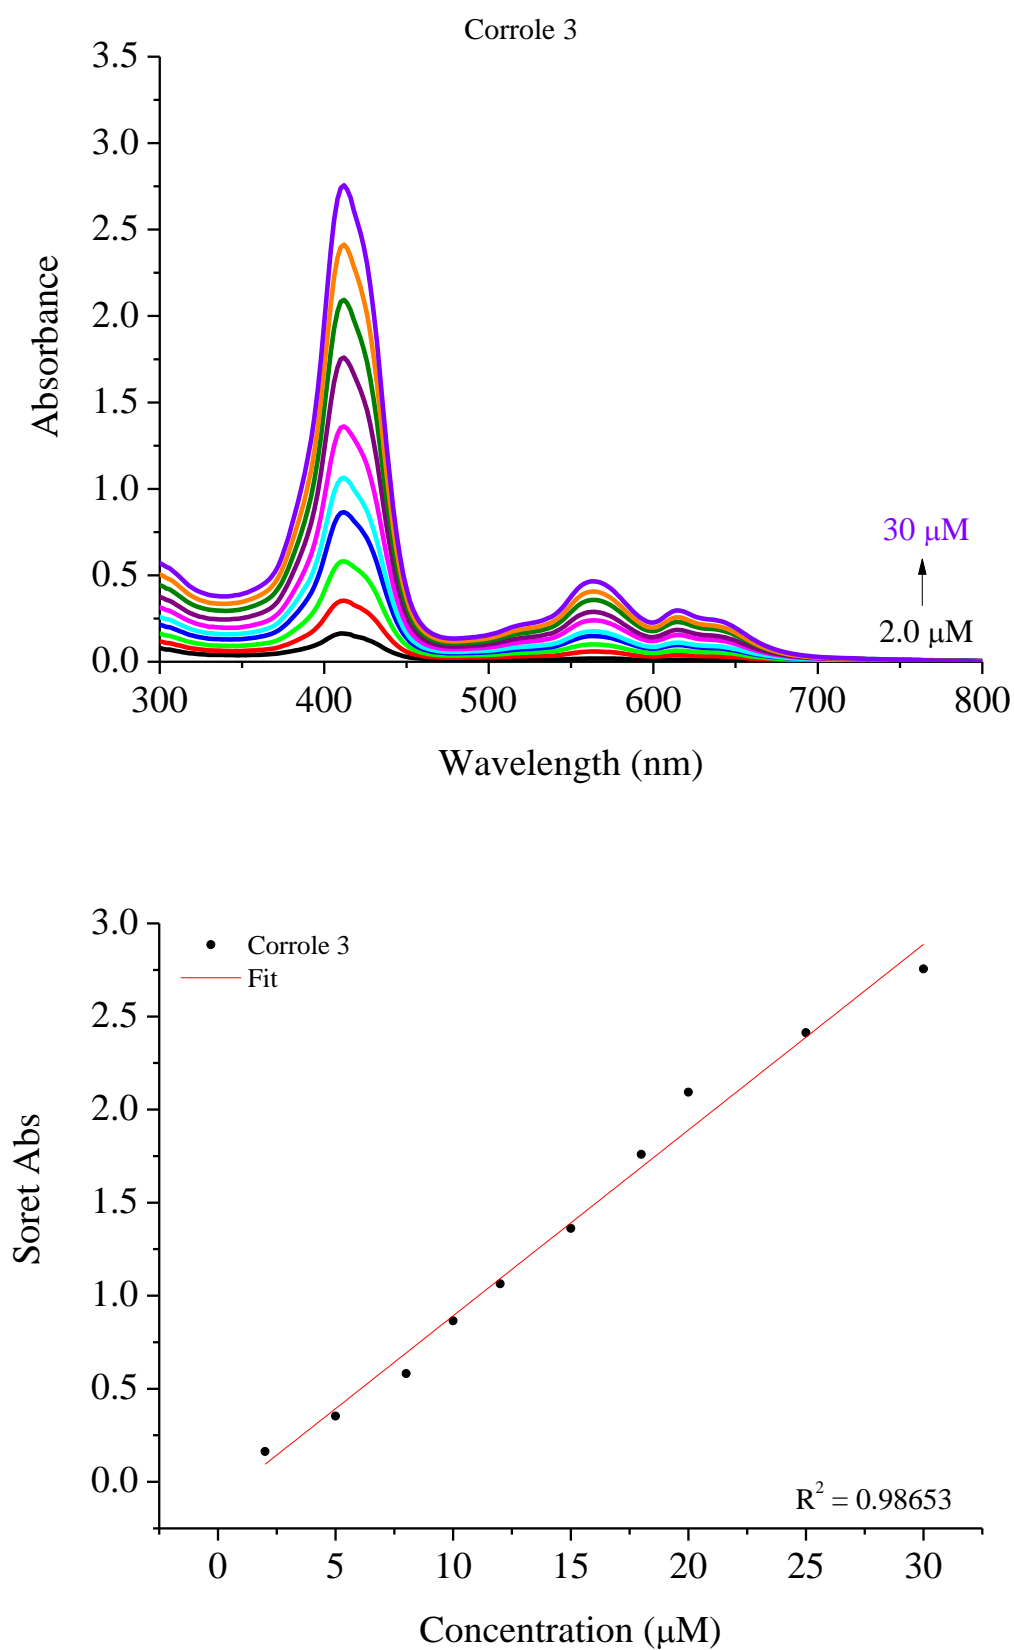

**Figure S21.** (up) Aggregation behavior of corrole **3** in DCM solution and (down)  $\text{Abs}_{\text{Soret}}$  versus concentration plot.

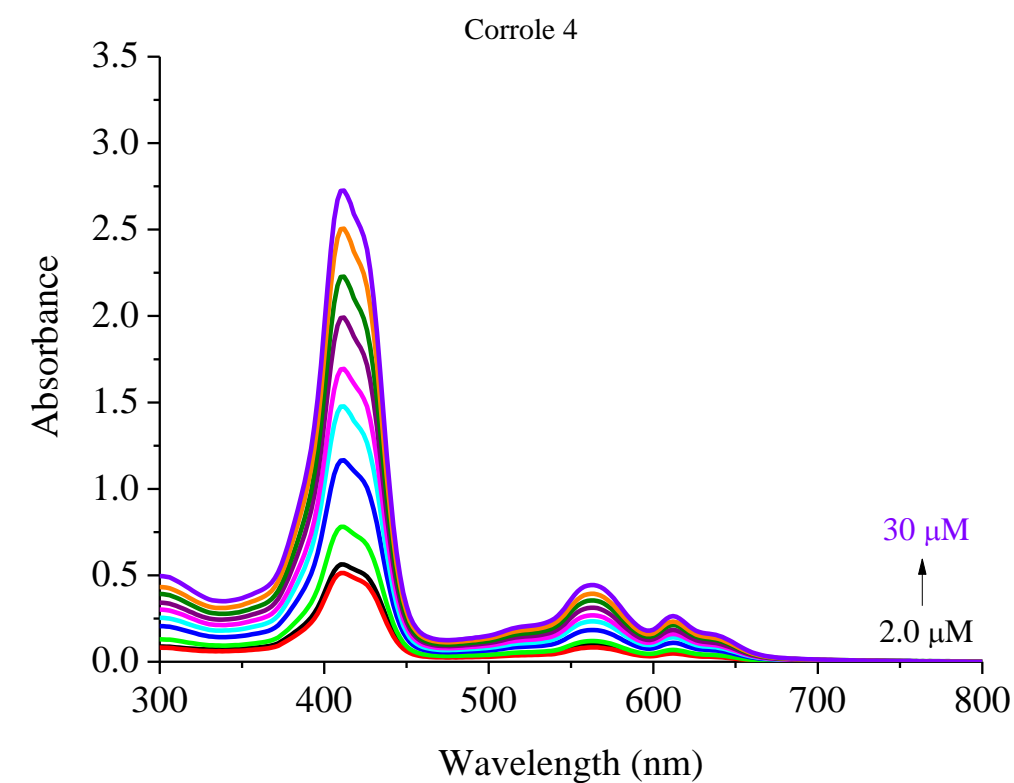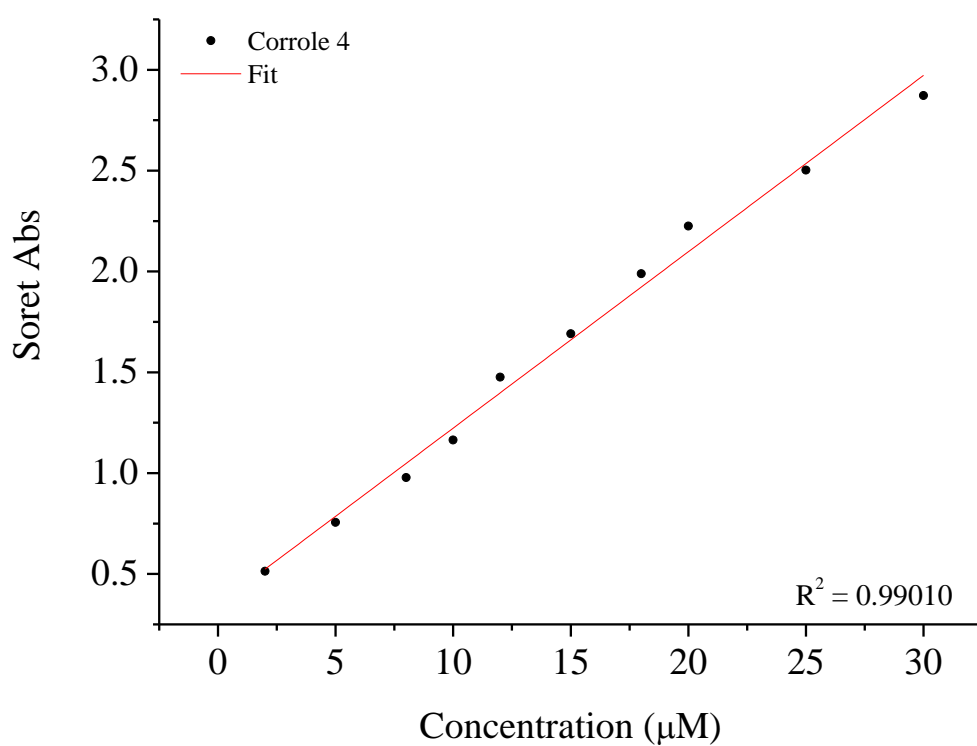

**Figure S22.** (up) Aggregation behavior of corrole **4** in DCM solution and (down)  $\text{Abs}_{\text{Soret}}$  versus concentration plot.



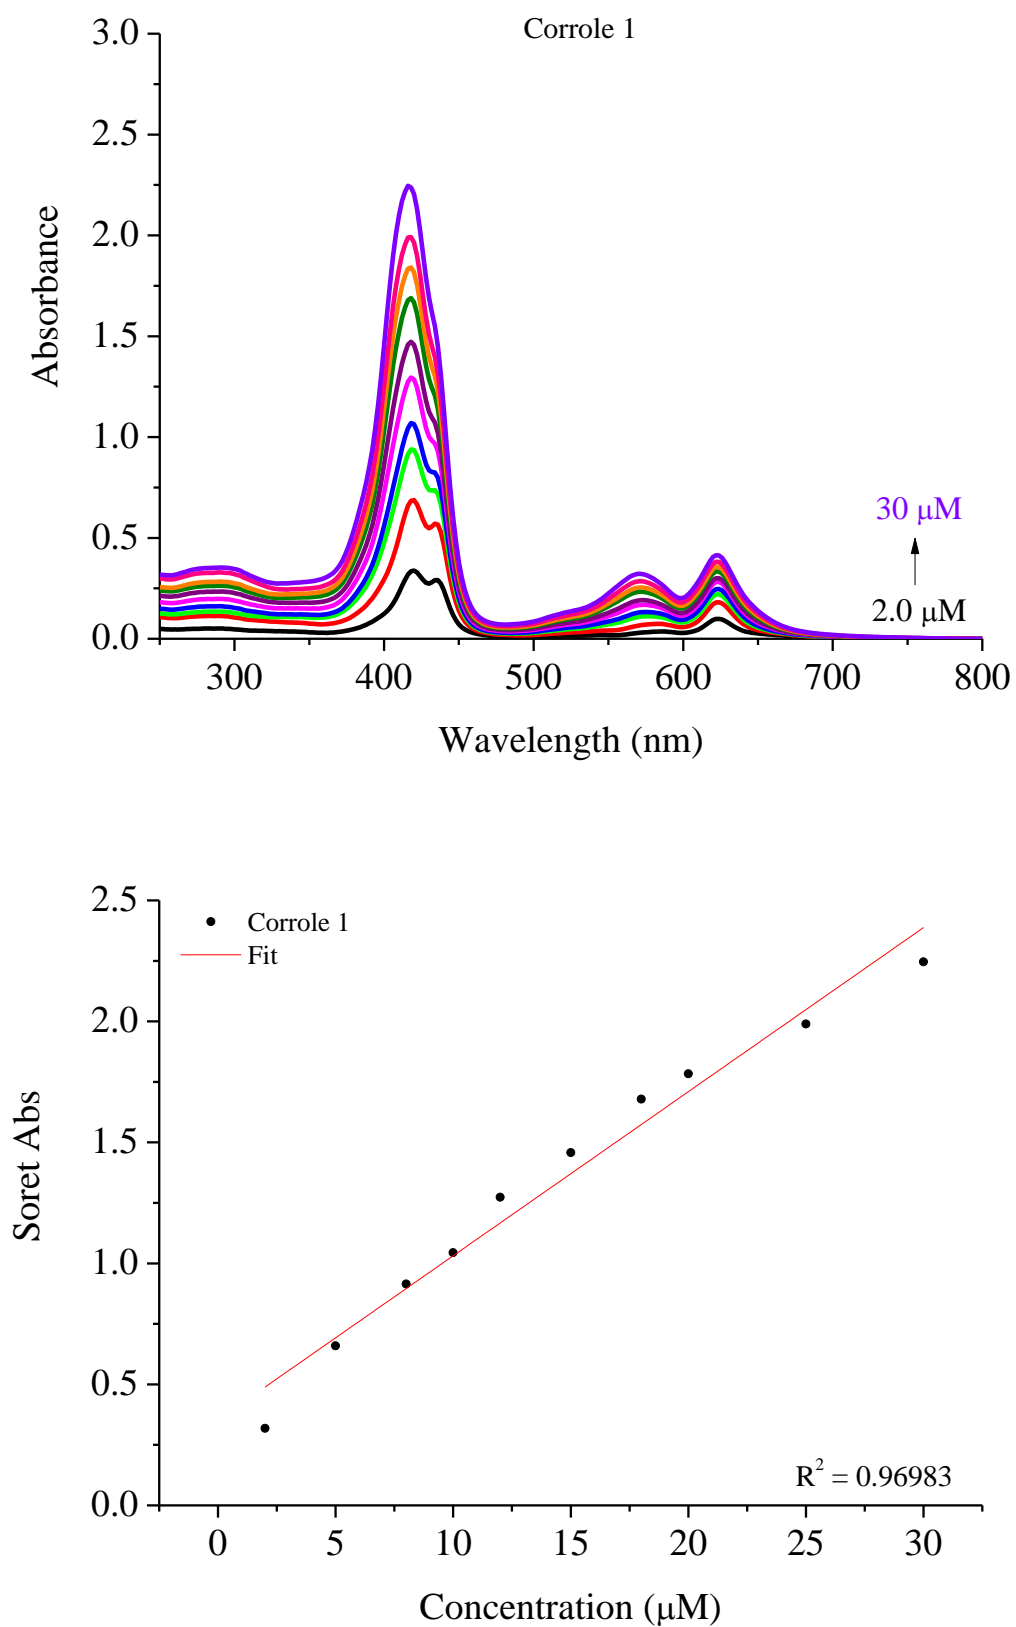

**Figure S23.** (up) Aggregation behavior of corrole 1 in ACN solution and (down)  $\text{Abs}_{\text{Soret}}$  versus concentration plot.

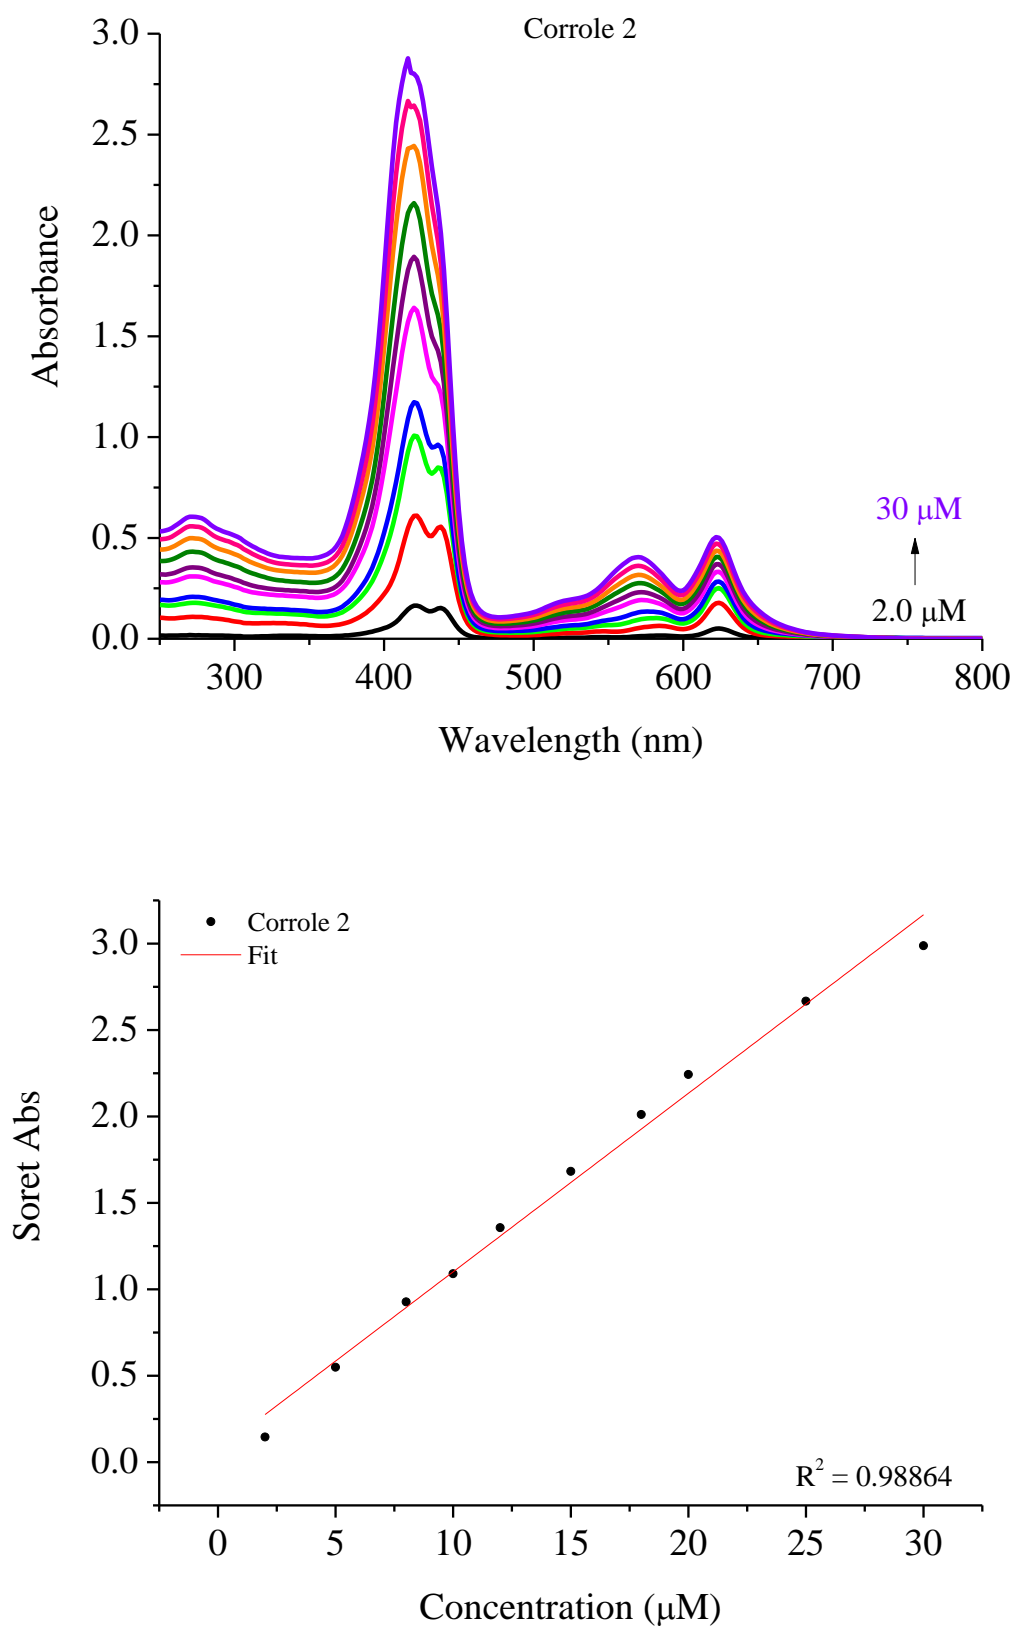

**Figure S24.** (up) Aggregation behavior of corrole **2** in ACN solution and (down)  $\text{Abs}_{\text{Soret}}$  versus concentration plot.

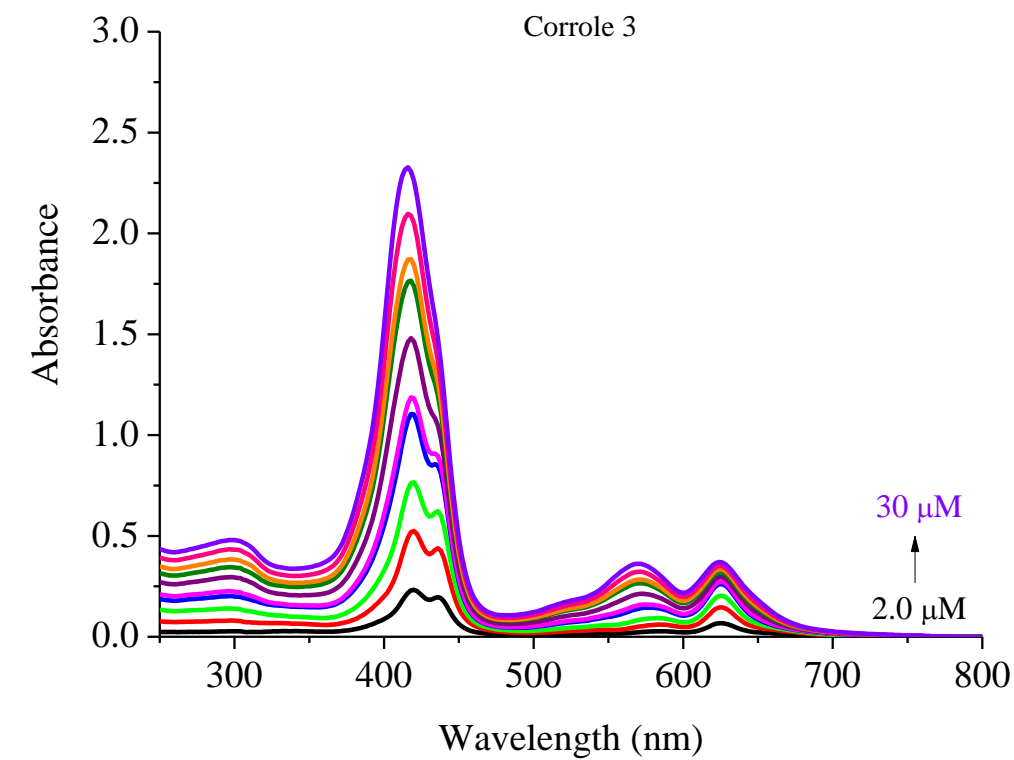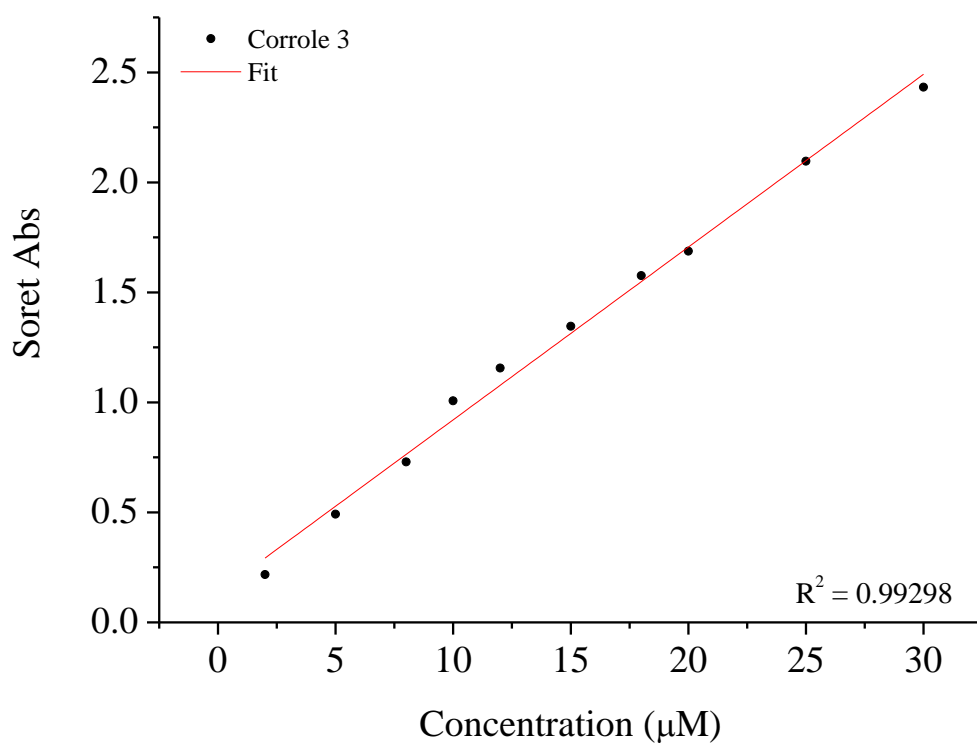

**Figure S25.** (up) Aggregation behavior of corrole **3** in ACN solution and (down)  $\text{Abs}_{\text{Soret}}$  versus concentration plot.

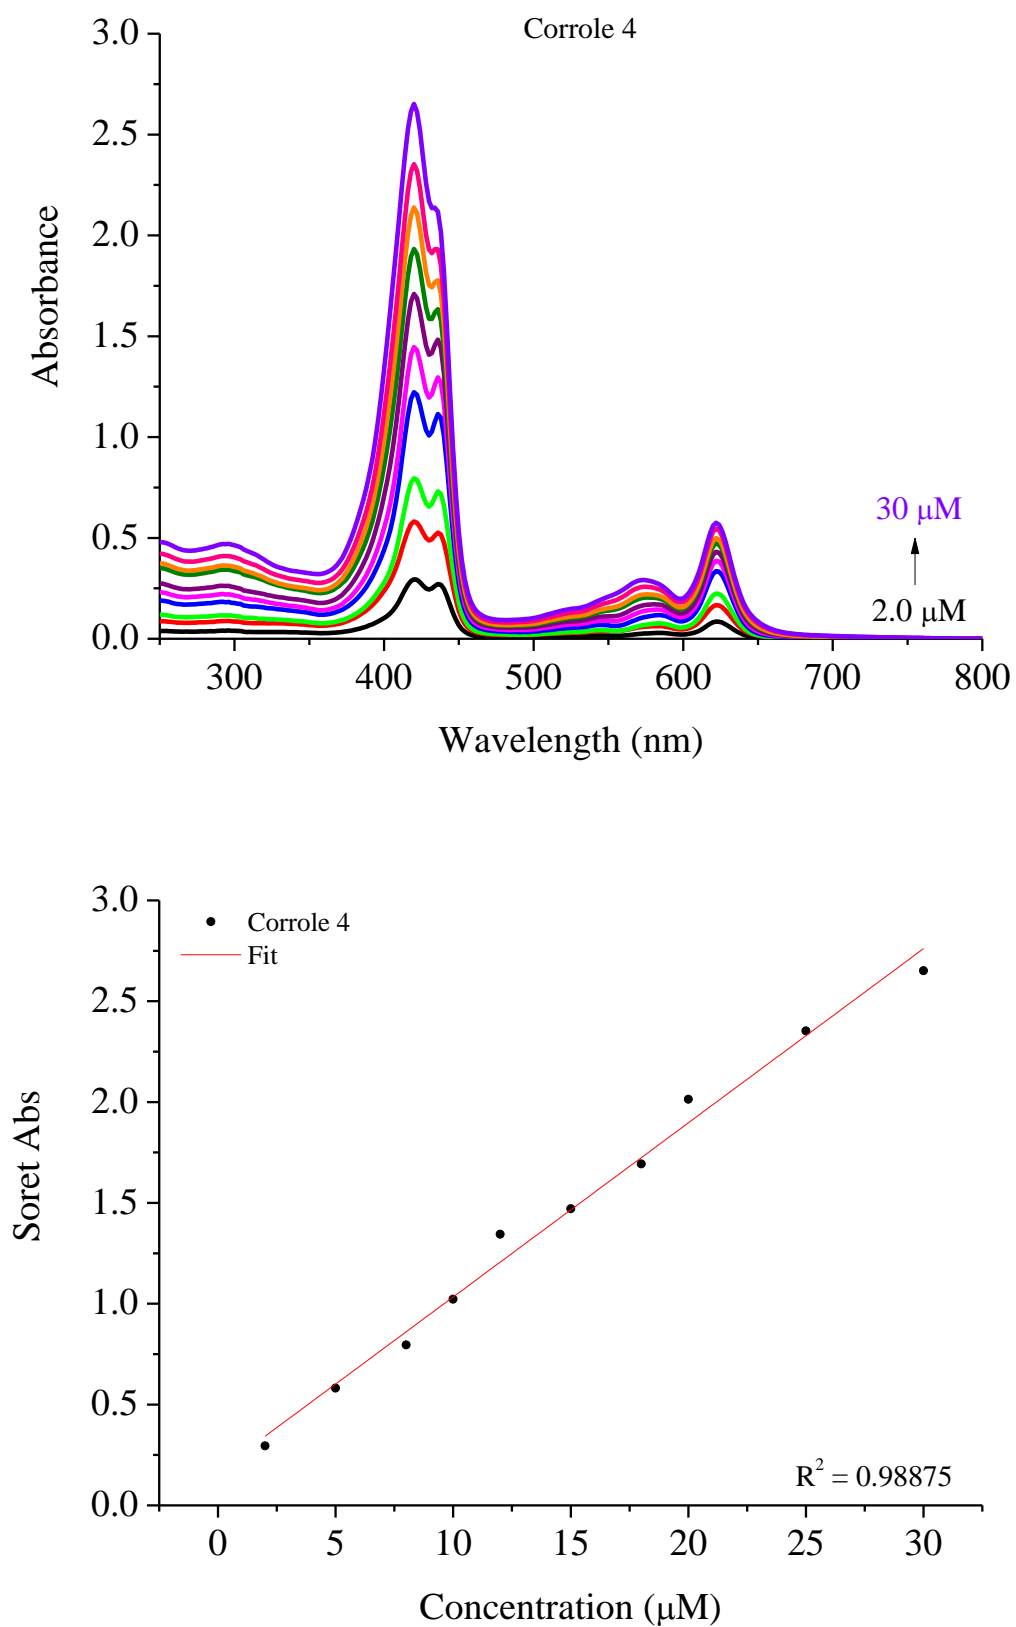

**Figure S26.** (up) Aggregation behavior of corrole 4 in ACN solution and (down)  $\text{Abs}_{\text{Soret}}$  versus concentration plot.

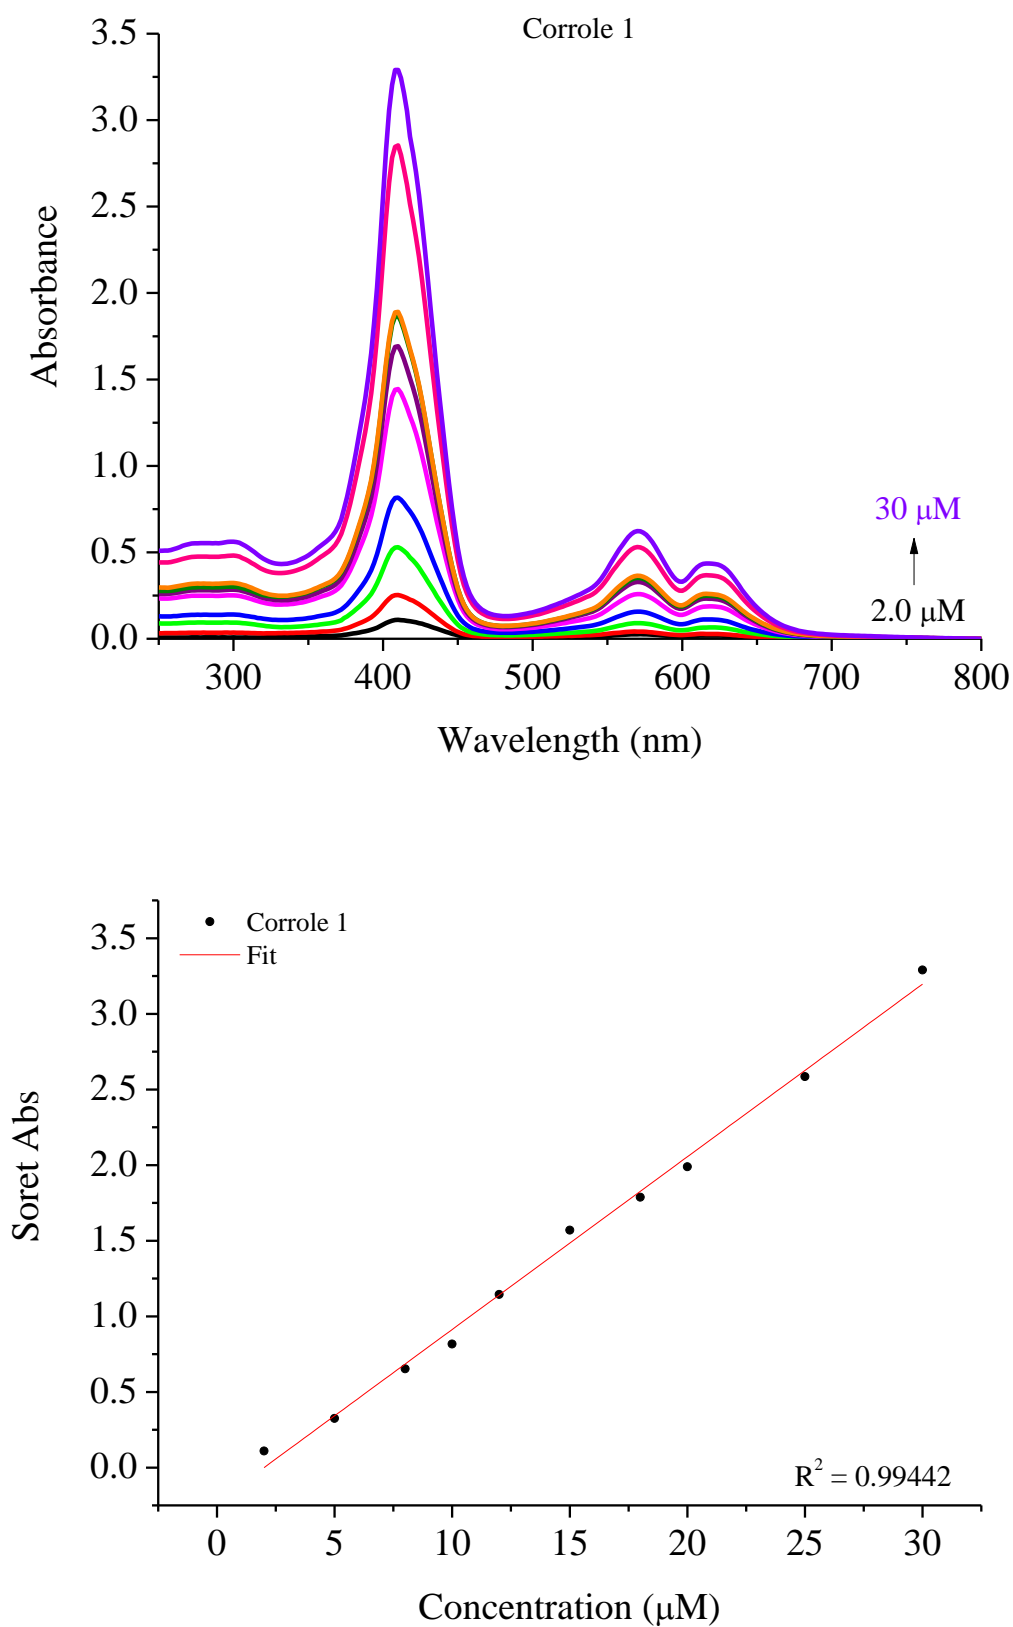

**Figure S27.** (up) Aggregation behavior of corrole 1 in MeOH solution and (down)  $\text{Abs}_{\text{Soret}}$  versus concentration plot.

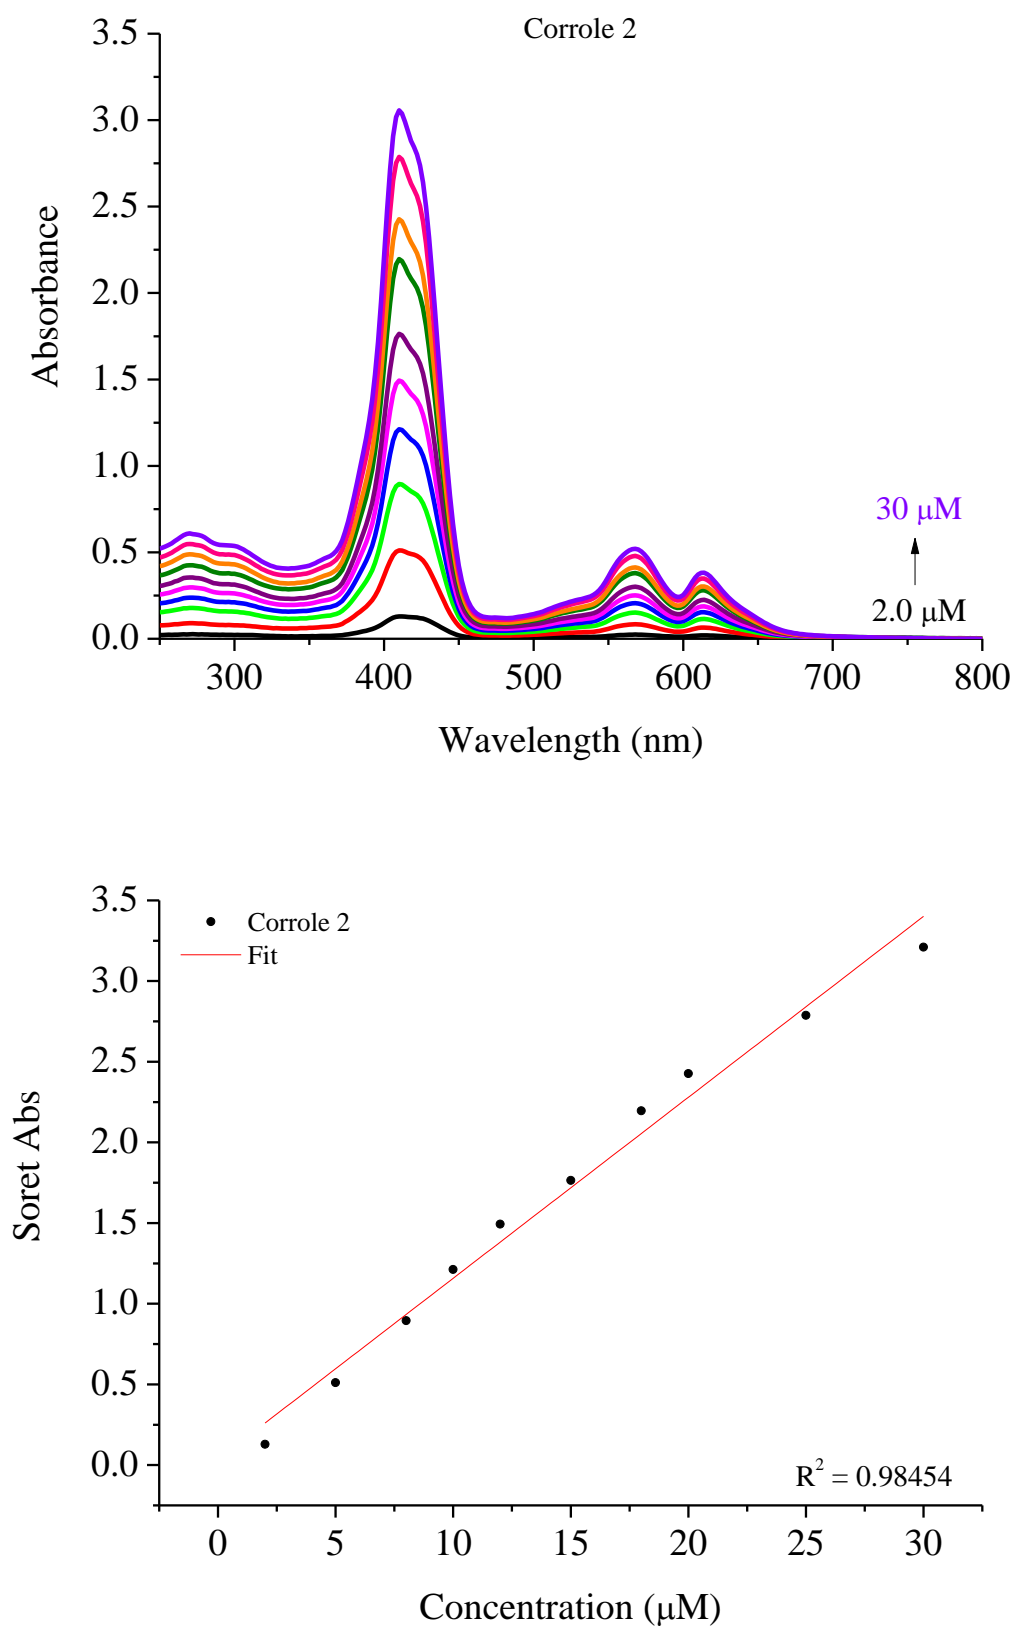

**Figure S28.** (up) Aggregation behavior of corrole **2** in MeOH solution and (down) Abs<sub>Soret</sub> versus concentration plot.

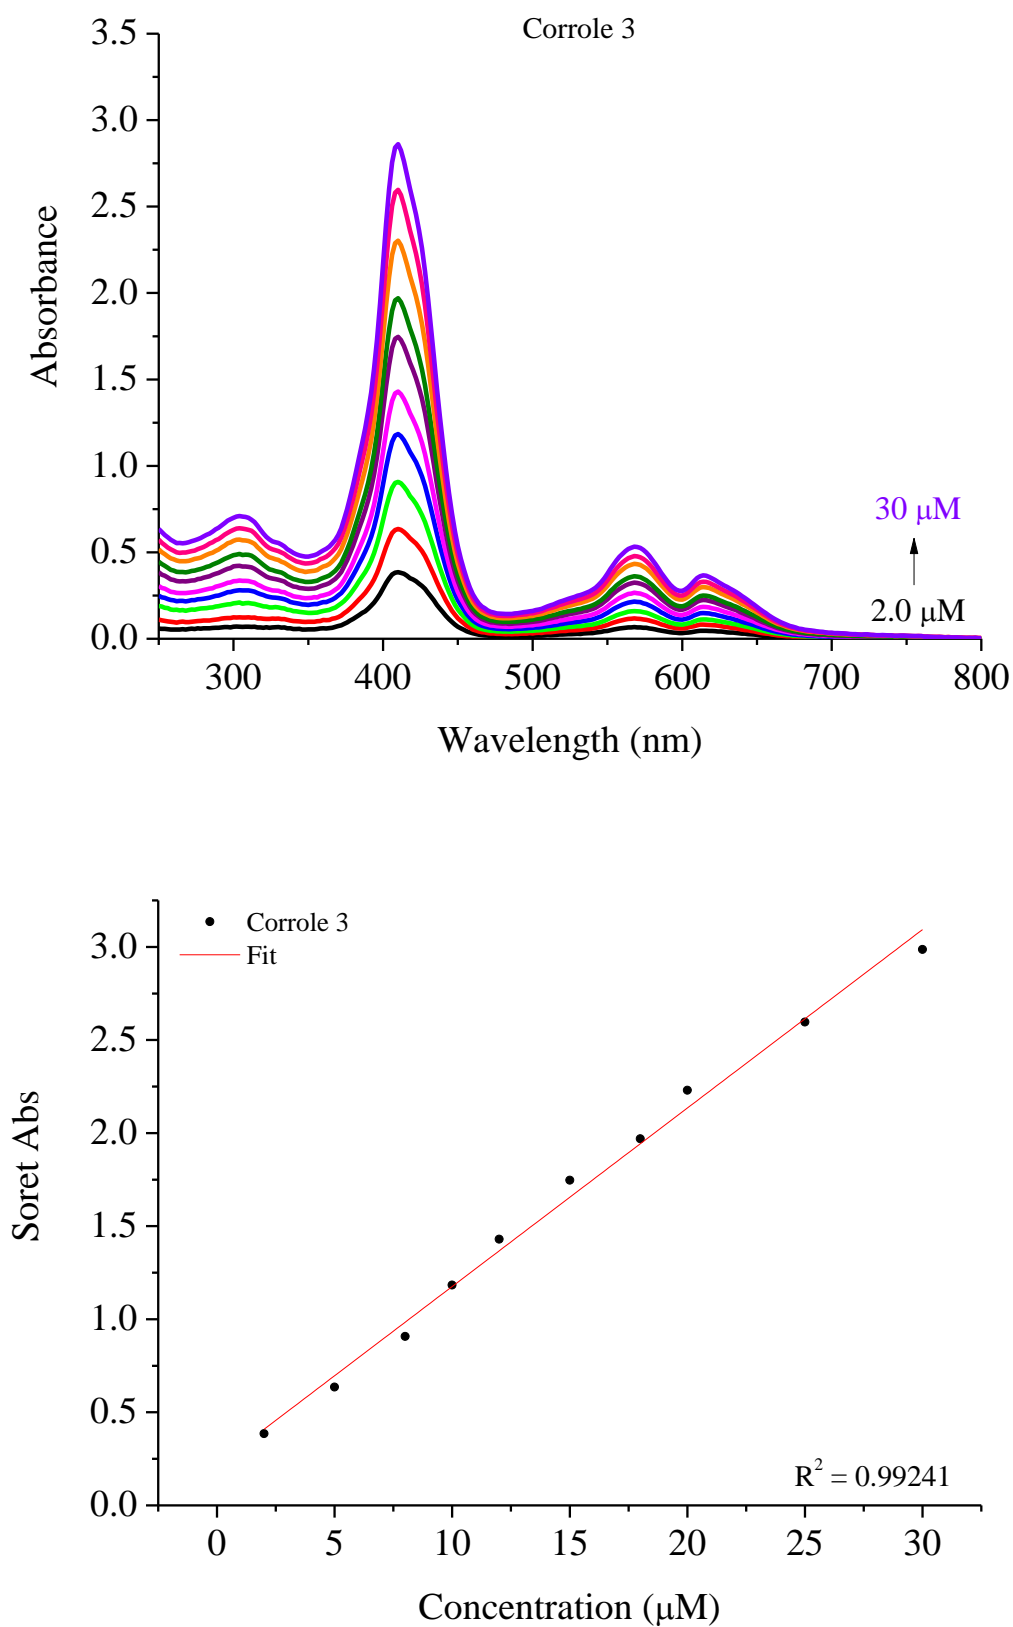

**Figure S29.** (up) Aggregation behavior of corrole 3 in MeOH solution and (down)  $\text{Abs}_{\text{Soret}}$  versus concentration plot.

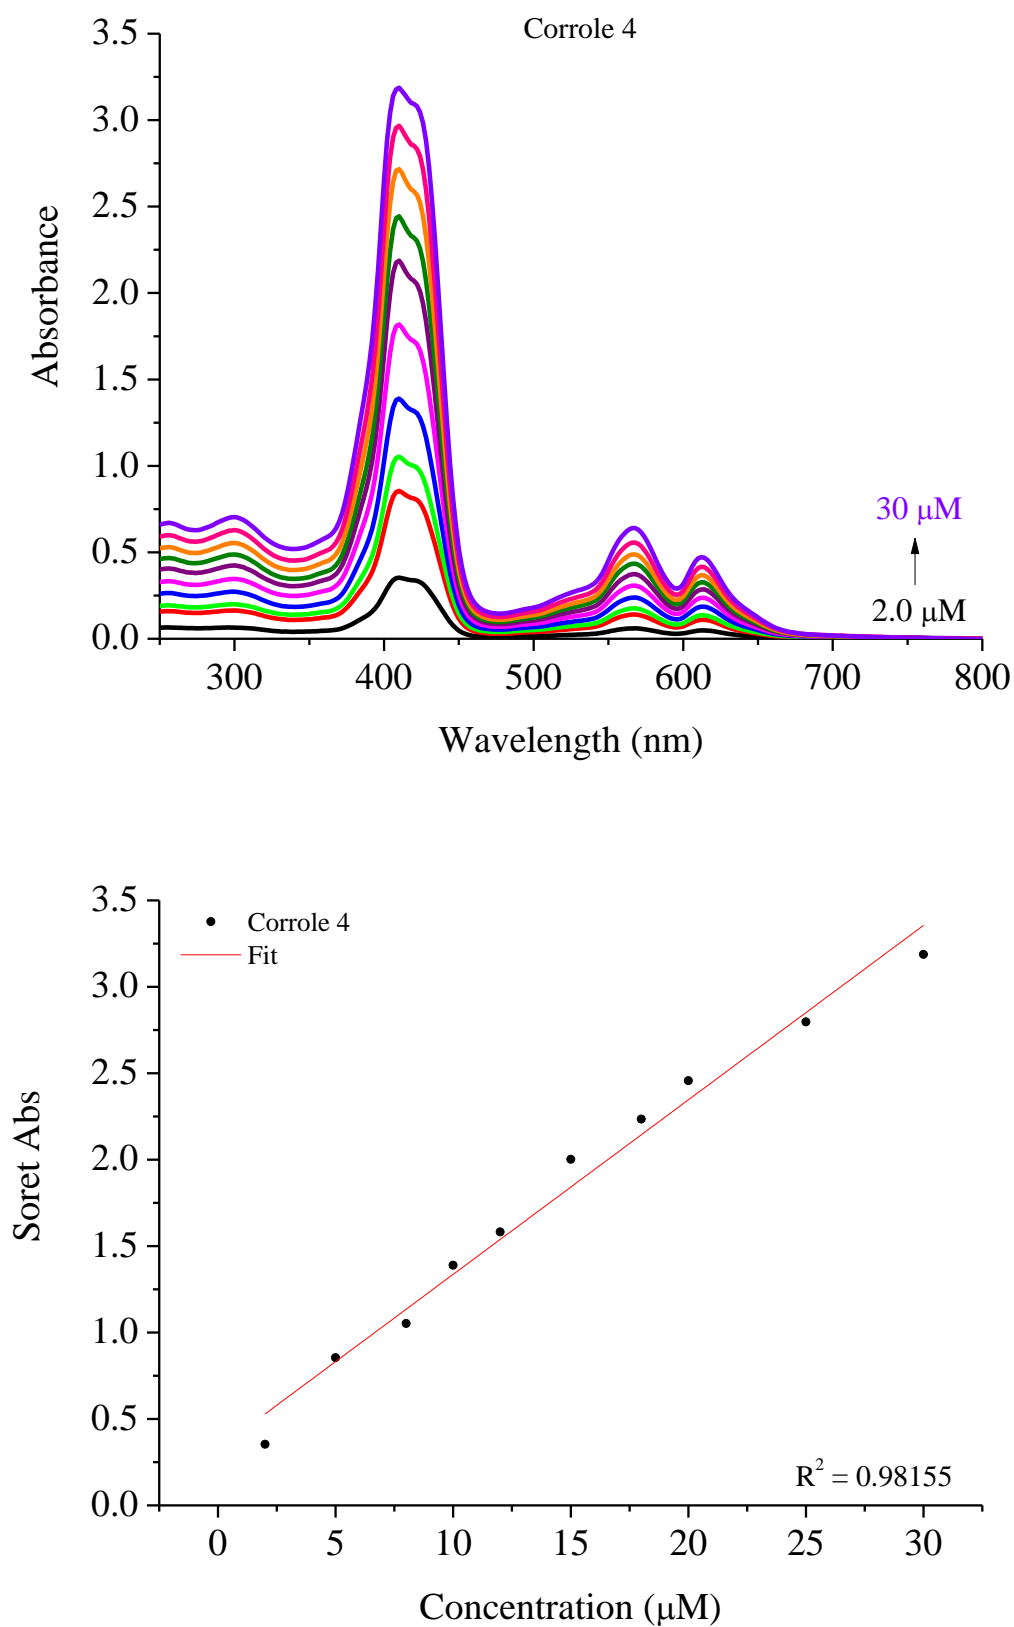

**Figure S30.** (up) Aggregation behavior of corrole **4** in MeOH solution and (down)  $\text{Abs}_{\text{Soret}}$  versus concentration plot.



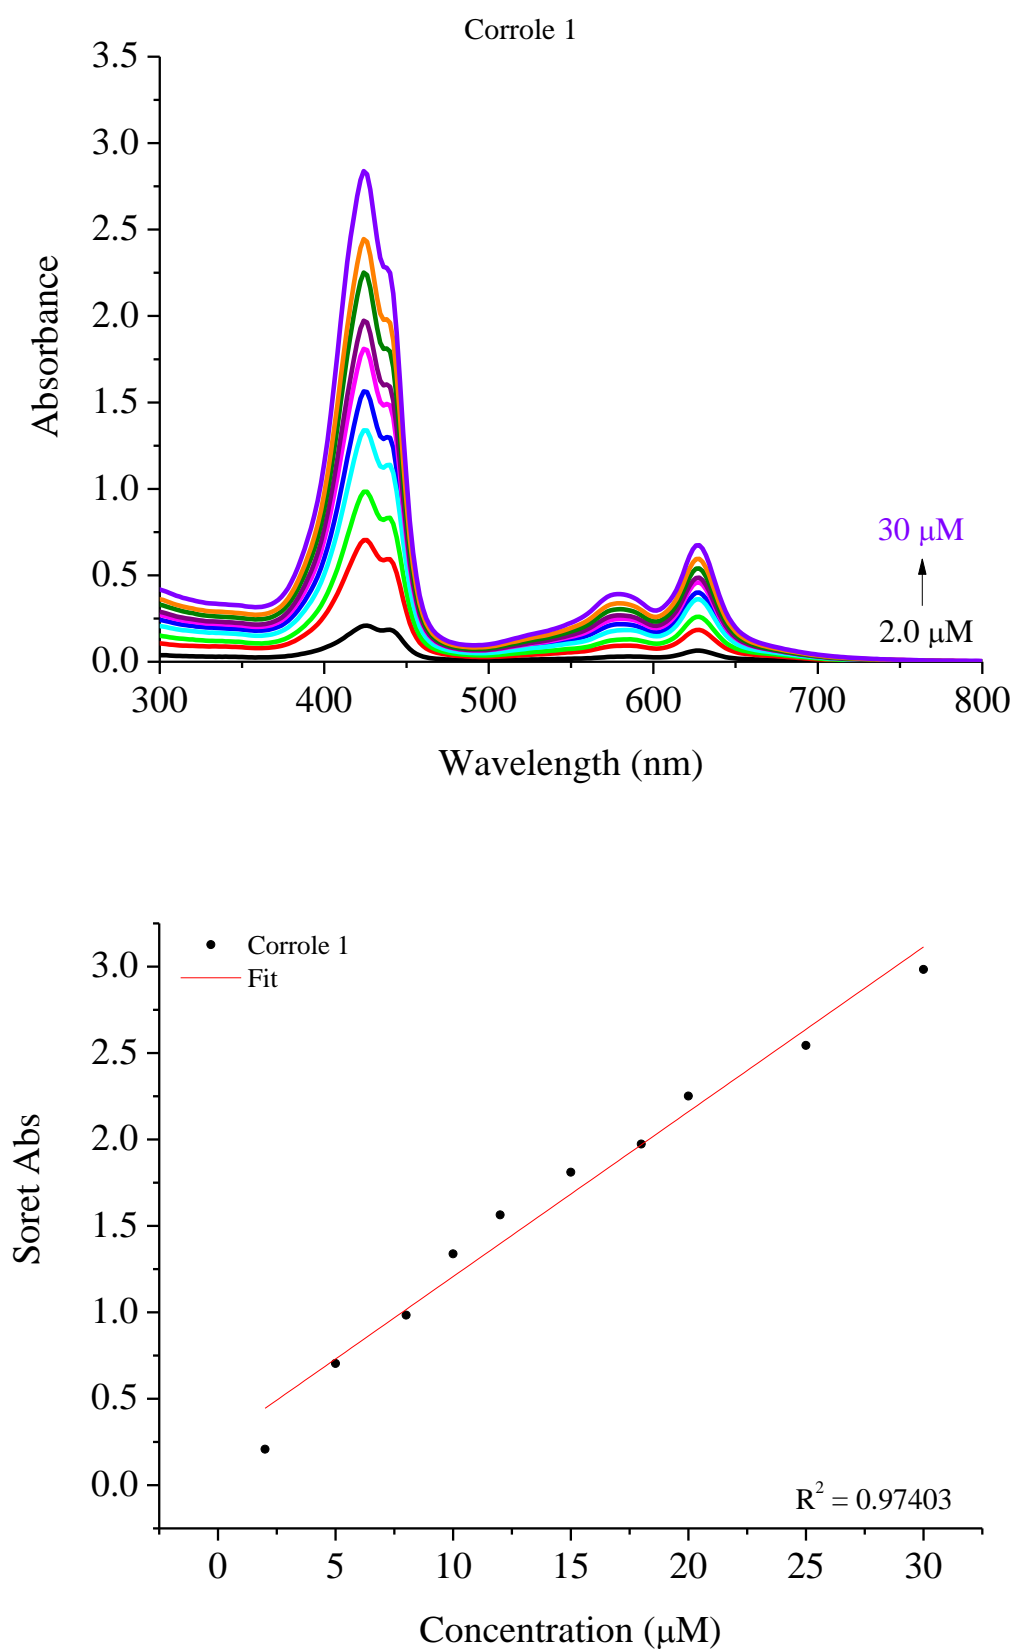

**Figure S31.** (up) Aggregation behavior of corrole 1 in DMSO solution and (down)  $\text{Abs}_{\text{Soret}}$  versus concentration plot.

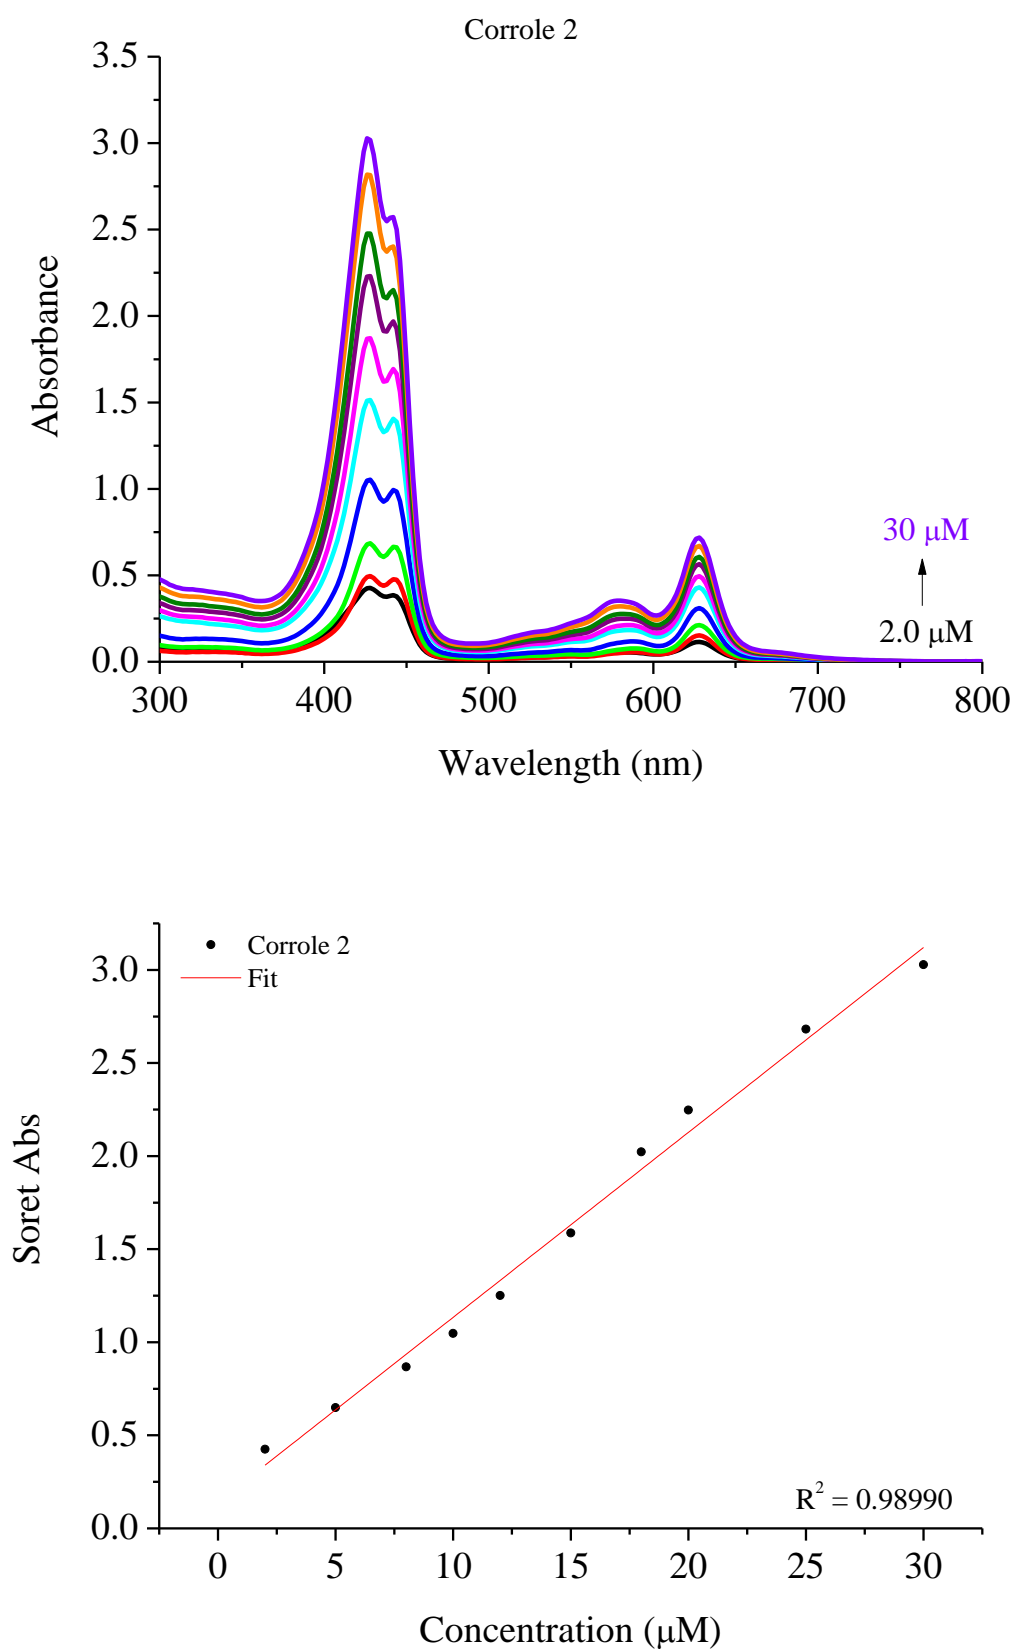

**Figure S32.** (up) Aggregation behavior of corrole **2** in DMSO solution and (down)  $\text{Abs}_{\text{Soret}}$  versus concentration plot.

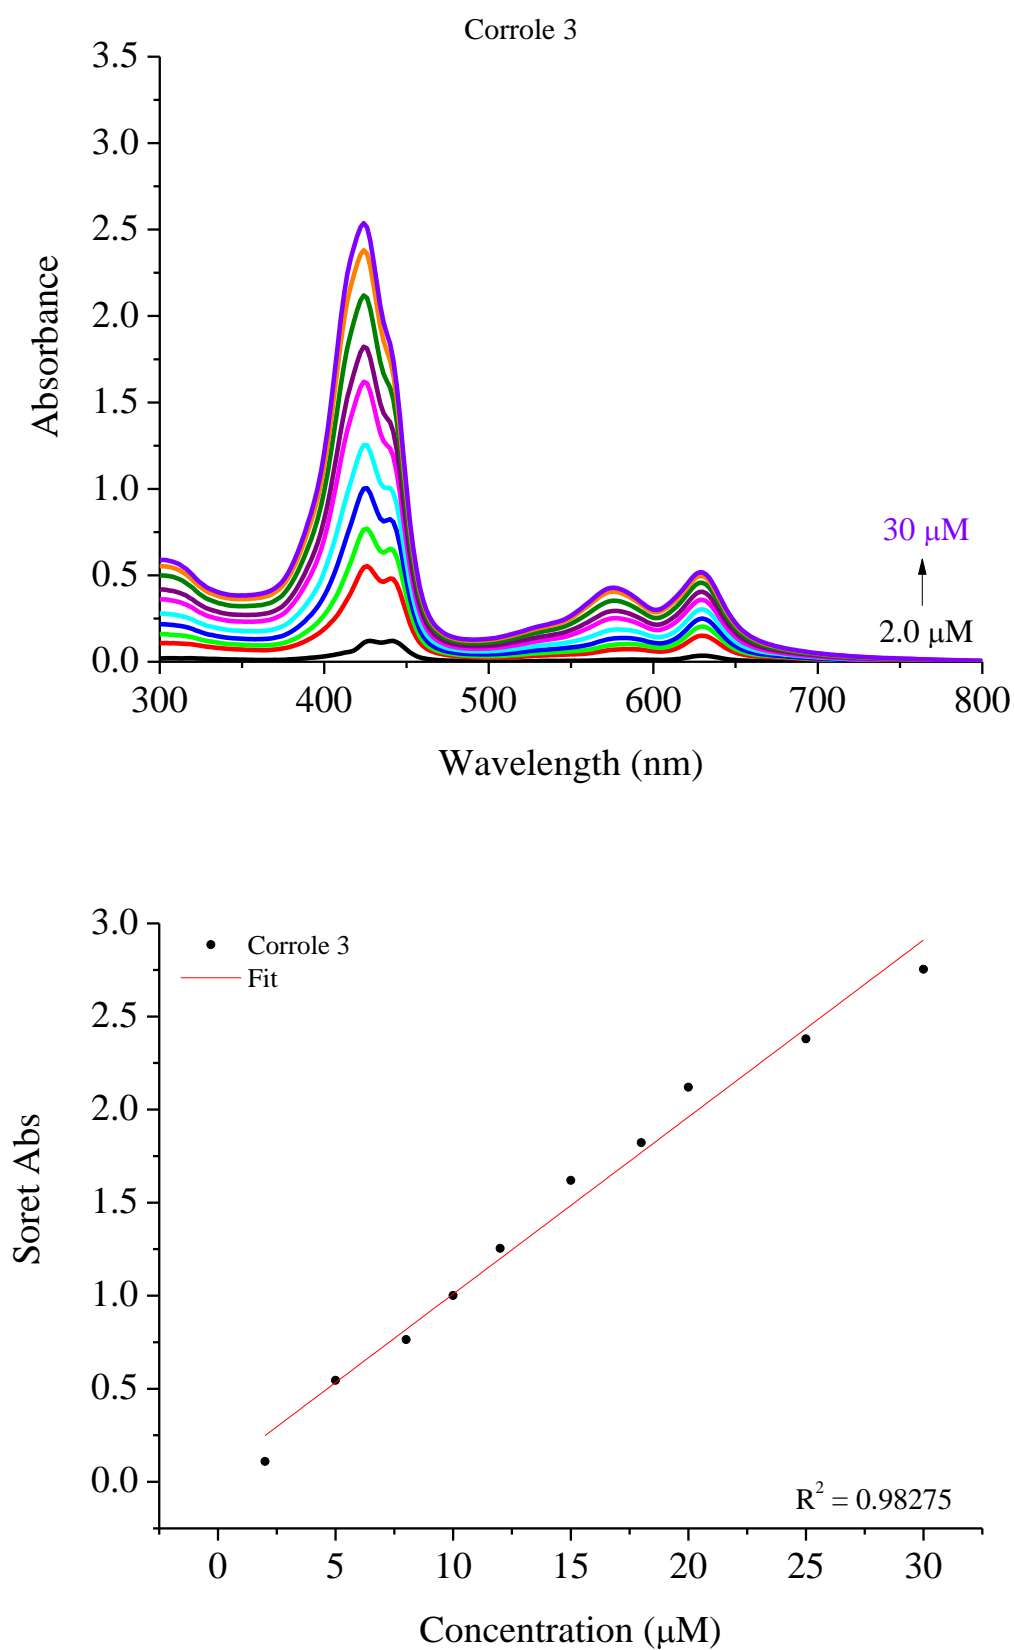

**Figure S33.** (up) Aggregation behavior of corrole **3** in DMSO solution and (down)  $\text{Abs}_{\text{Soret}}$  versus concentration plot.

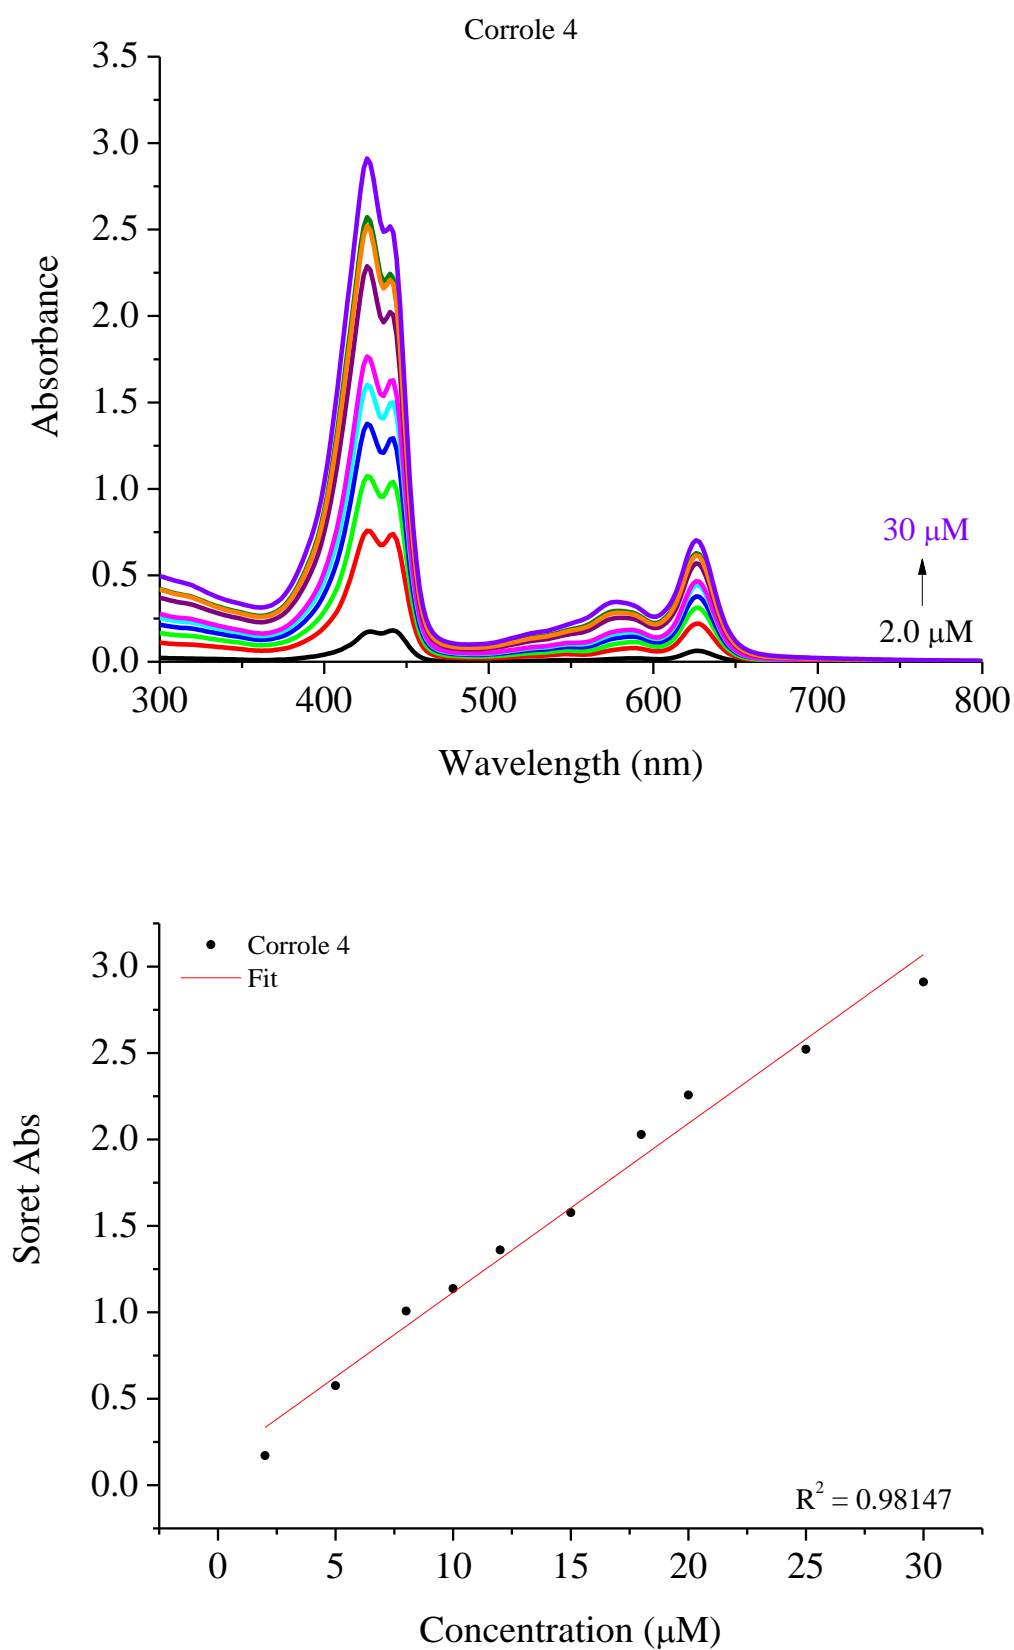

**Figure S34.** (up) Aggregation behavior of corrole 4 in DMSO solution and (down)  $\text{Abs}_{\text{Soret}}$  versus concentration plot.

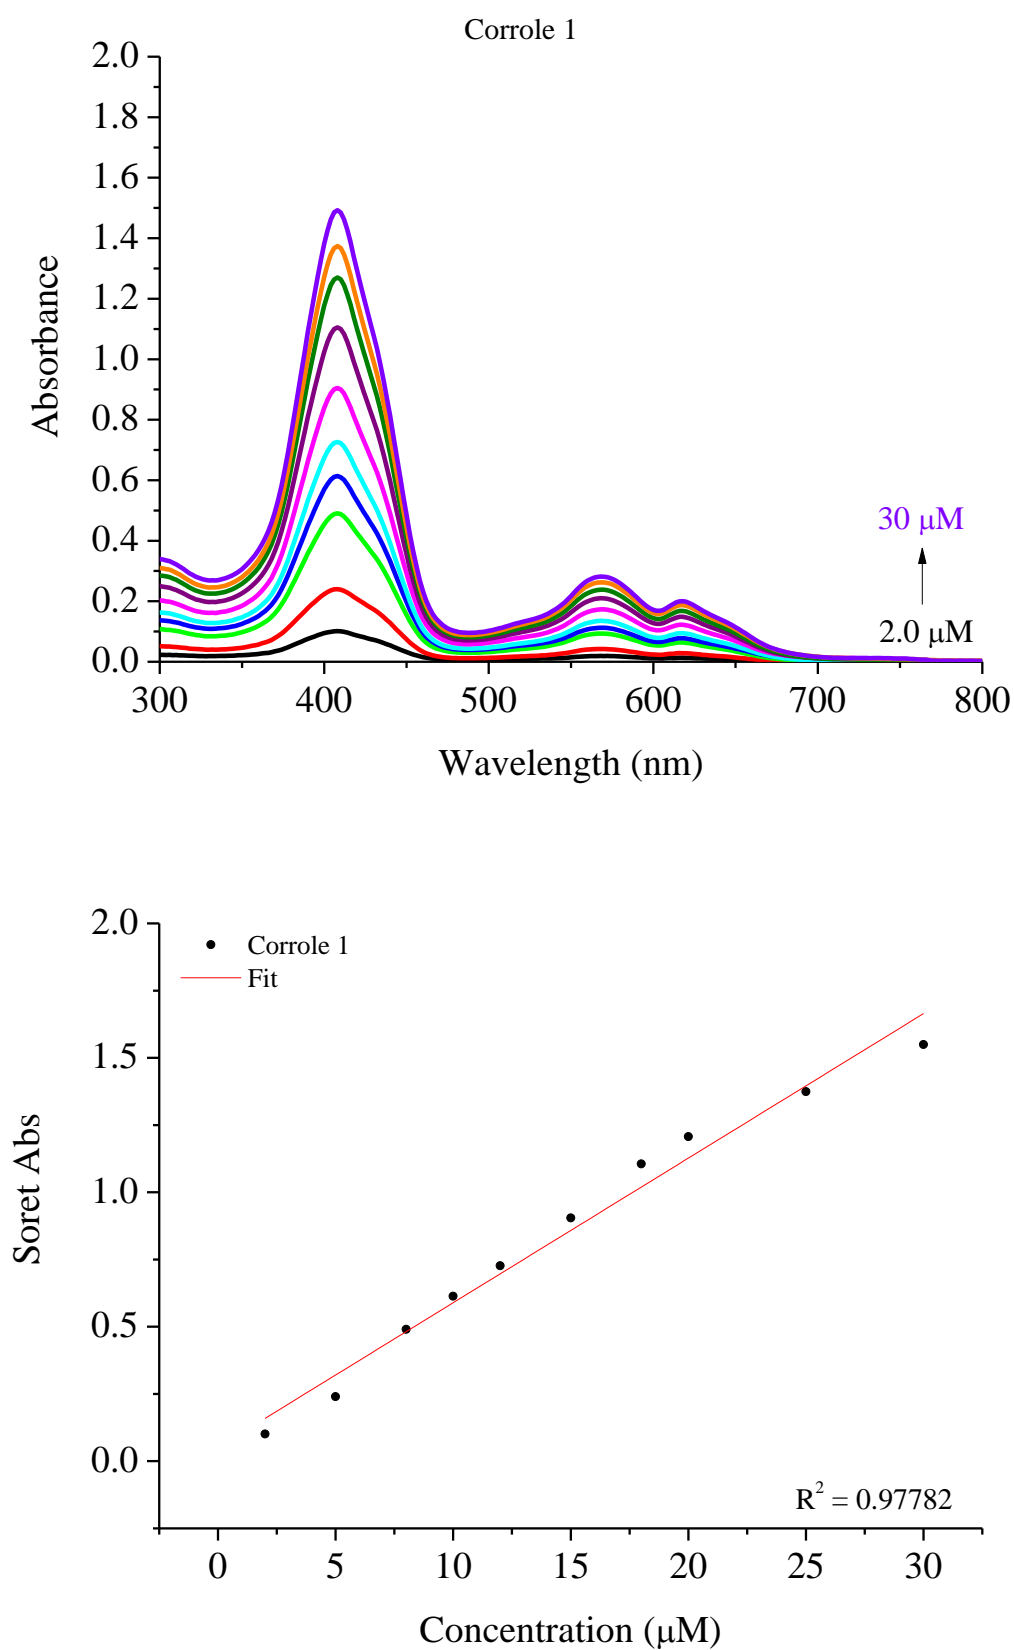

**Figure S35.** (up) Aggregation behavior of corrole 1 in DMSO(5%)/Tris-HCl pH 7.4 buffered mixture solution and (down) Abs<sub>Soret</sub> versus concentration plot.

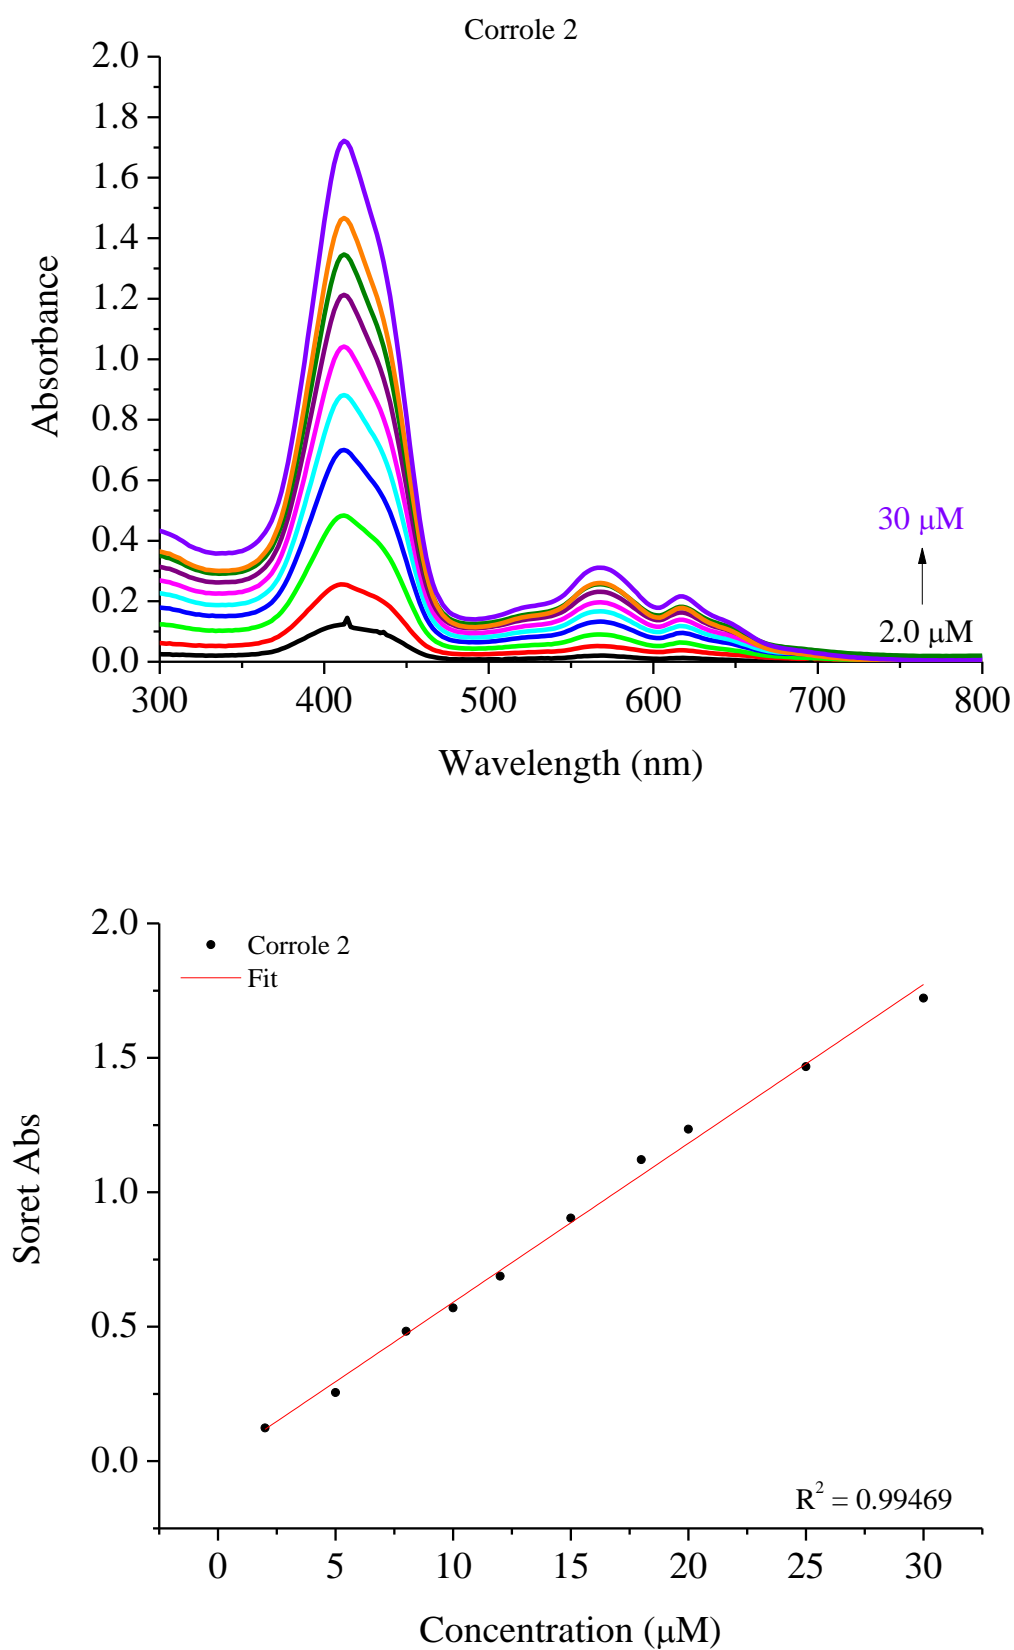

**Figure S36.** (up) Aggregation behavior of corrole 2 in DMSO(5%)/Tris-HCl pH 7.4 buffered mixture solution and (down)  $\text{Abs}_{\text{Soret}}$  versus concentration plot.

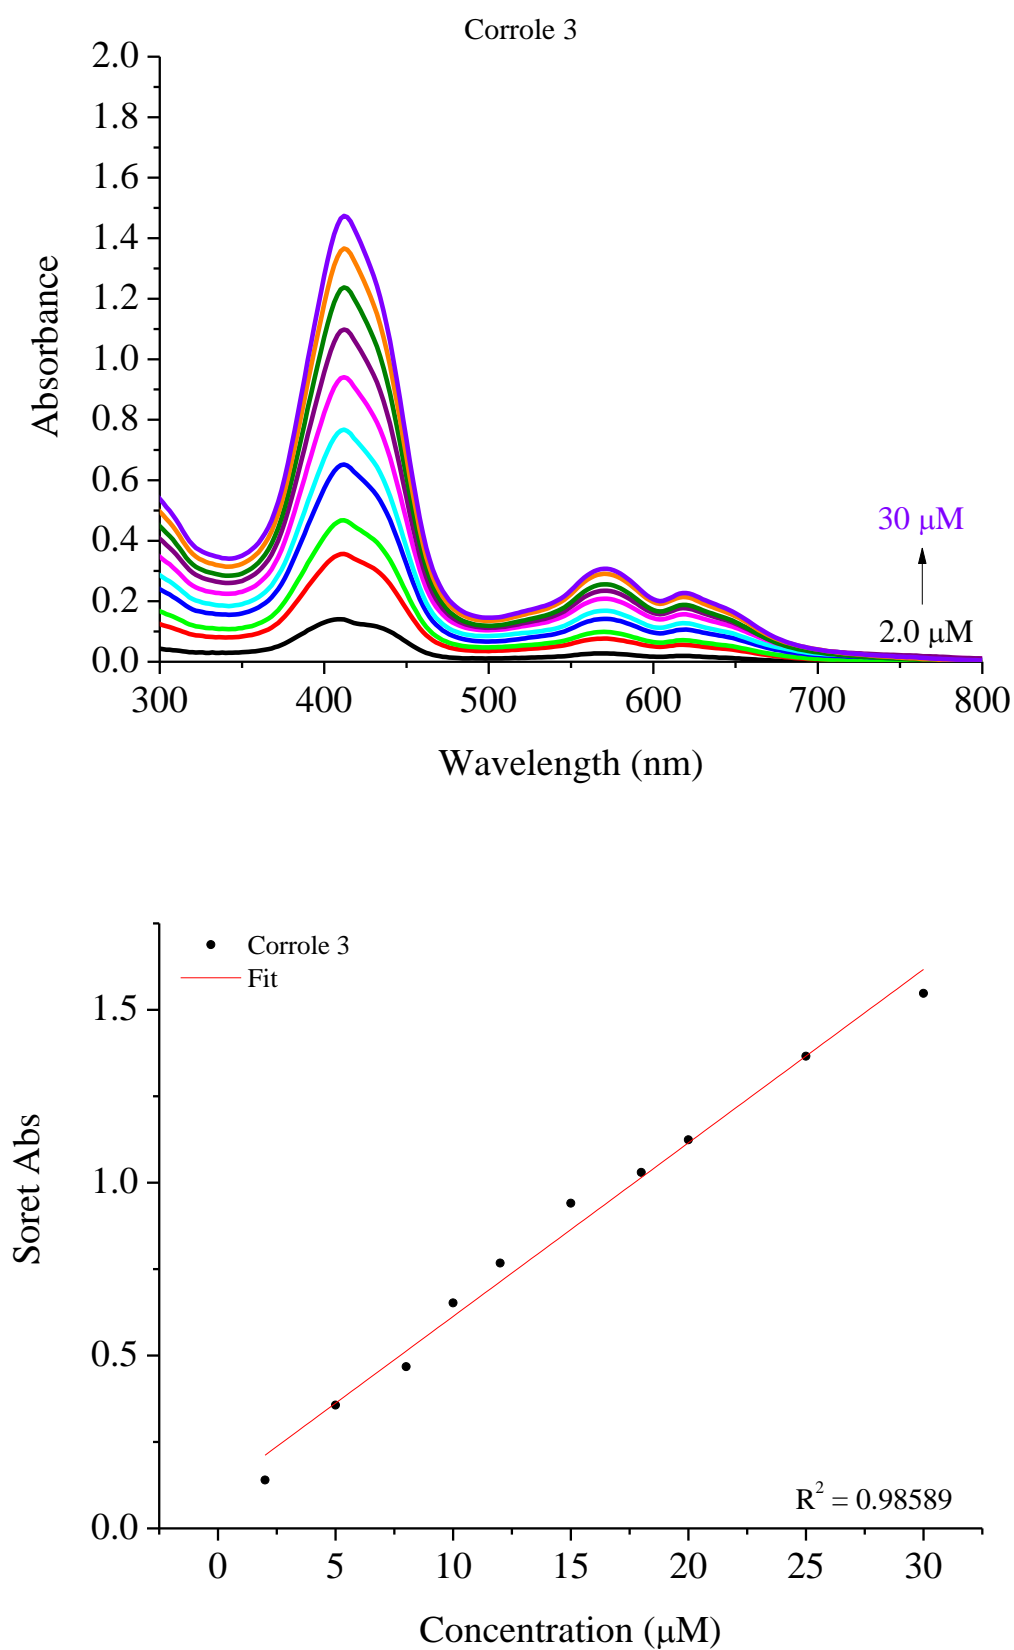

**Figure S37.** (up) Aggregation behavior of corrole 3 in DMSO(5%)/Tris-HCl pH 7.4 buffered mixture solution and (down) Abs<sub>Soret</sub> versus concentration plot.

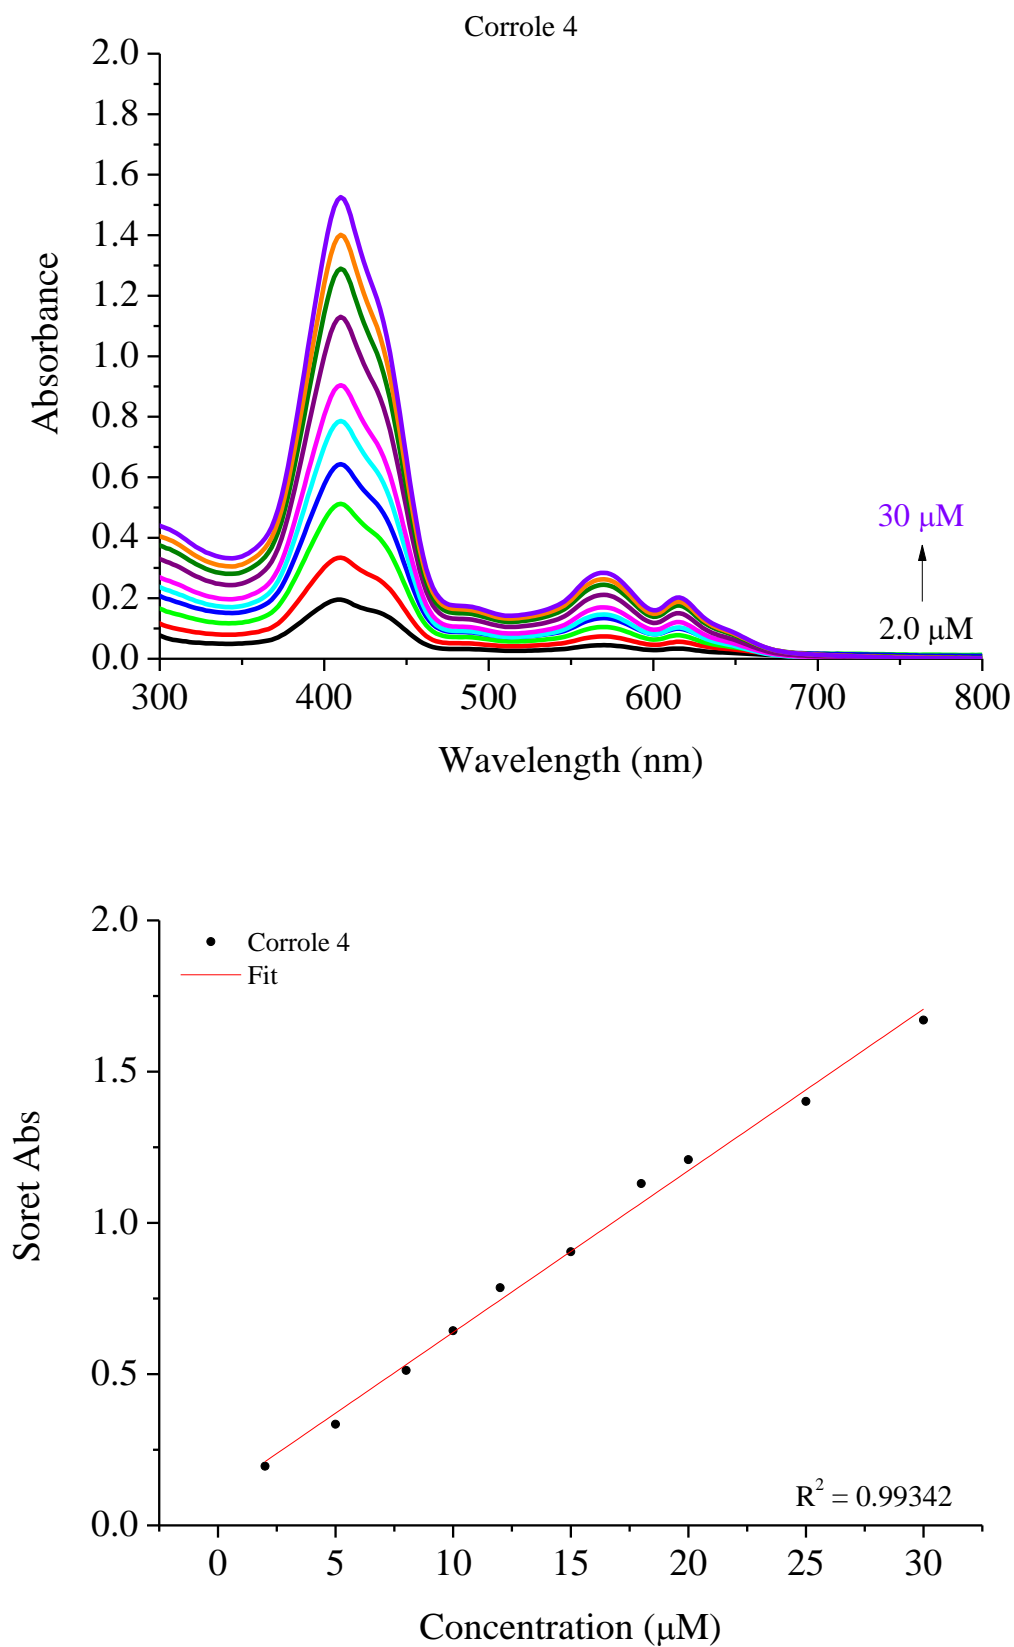

**Figure S38.** (up) Aggregation behavior of corrole 4 in DMSO(5%)/Tris-HCl pH 7.4 buffered mixture solution and (down)  $\text{Abs}_{\text{Soret}}$  versus concentration plot.



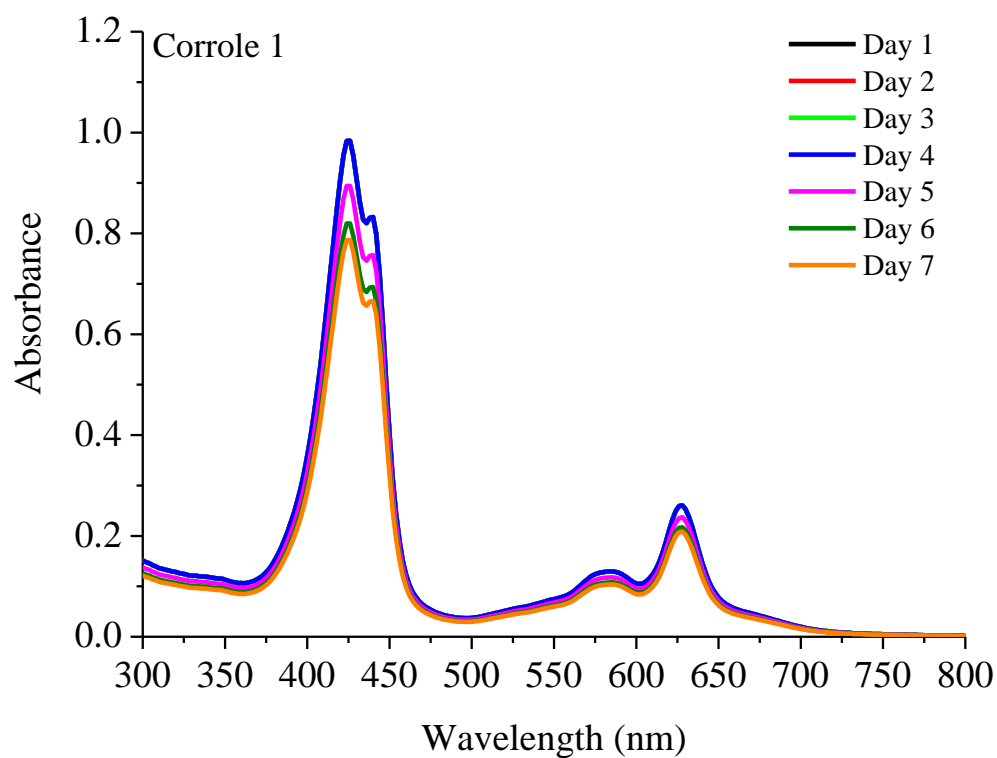

**Figure S39.** Stability assay of corrole 1 in DMSO solution.

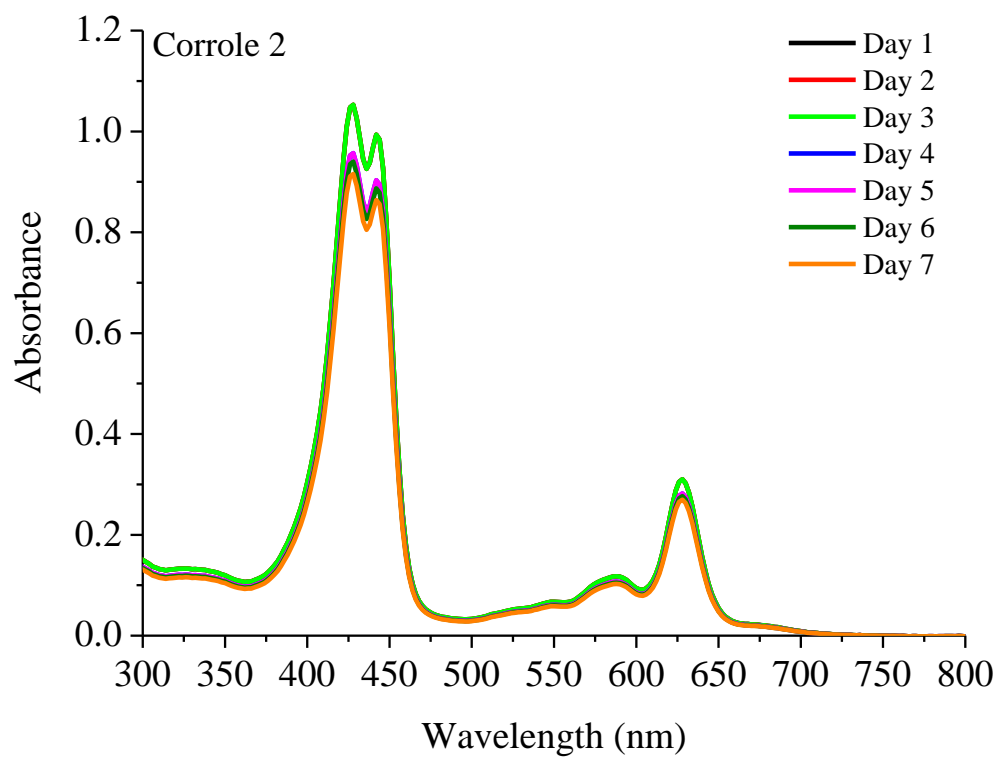

**Figure S40.** Stability assay of corrole 2 in DMSO solution.

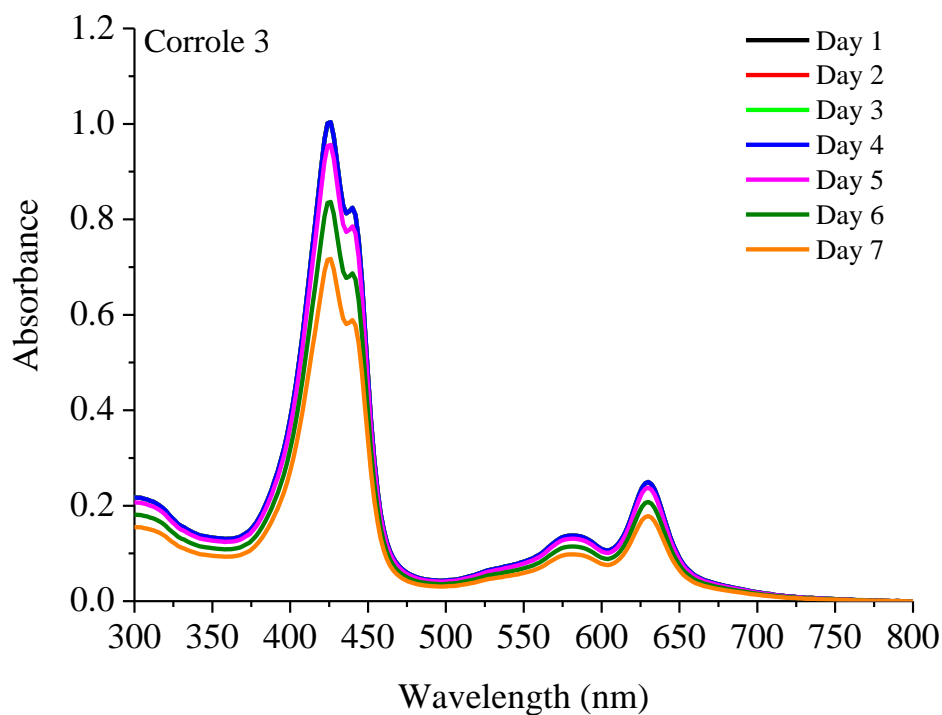

**Figure S41.** Stability assay of corrole **3** in DMSO solution.

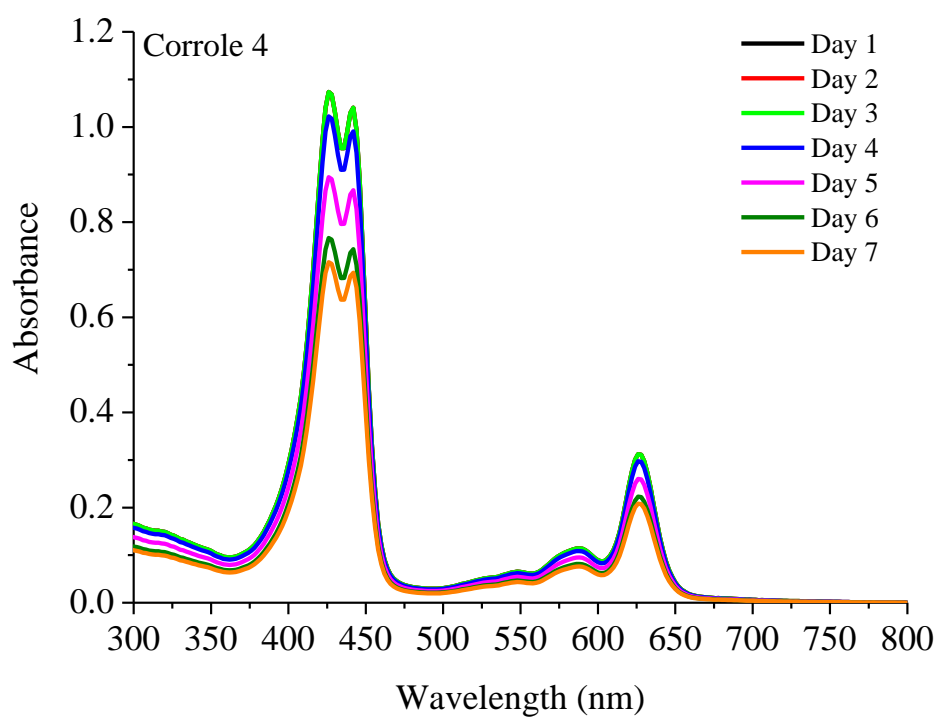

**Figure S42.** Stability assay of corrole **4** in DMSO solution.

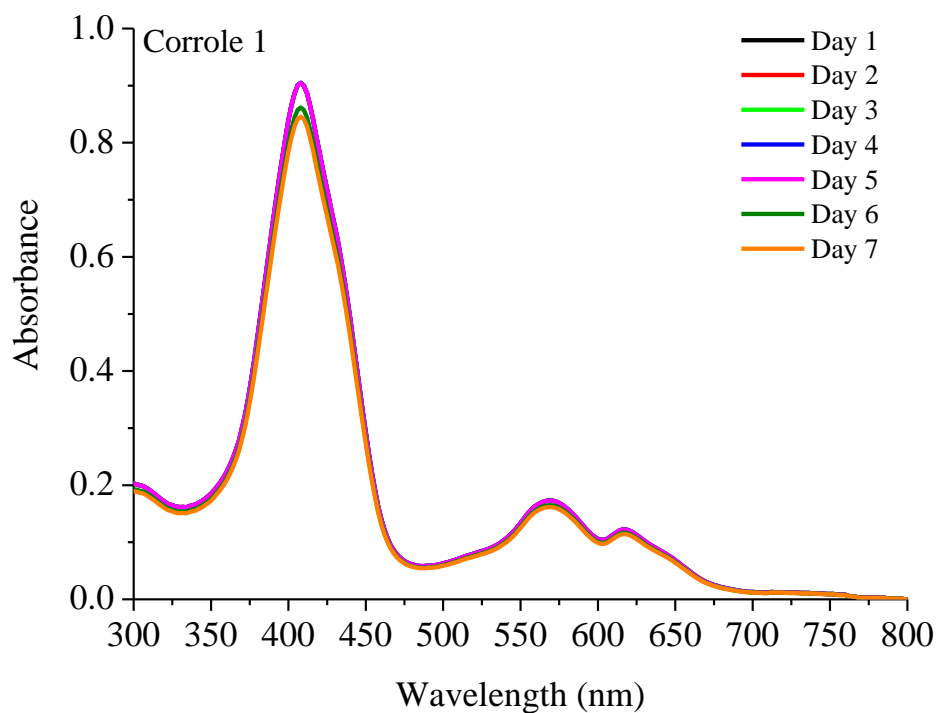

**Figure S43.** Stability assay of corrole 1 in DMSO(5%)/Tris-HCl pH 7.4 buffered mixture solution.

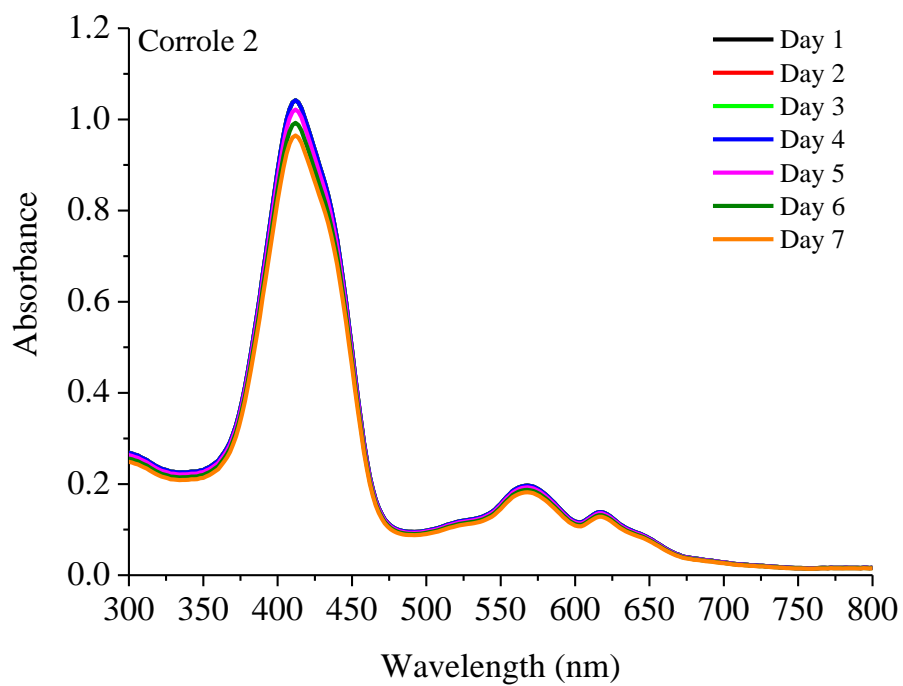

**Figure S44.** Stability assay of corrole 2 in DMSO(5%)/Tris-HCl pH 7.4 buffered mixture solution.

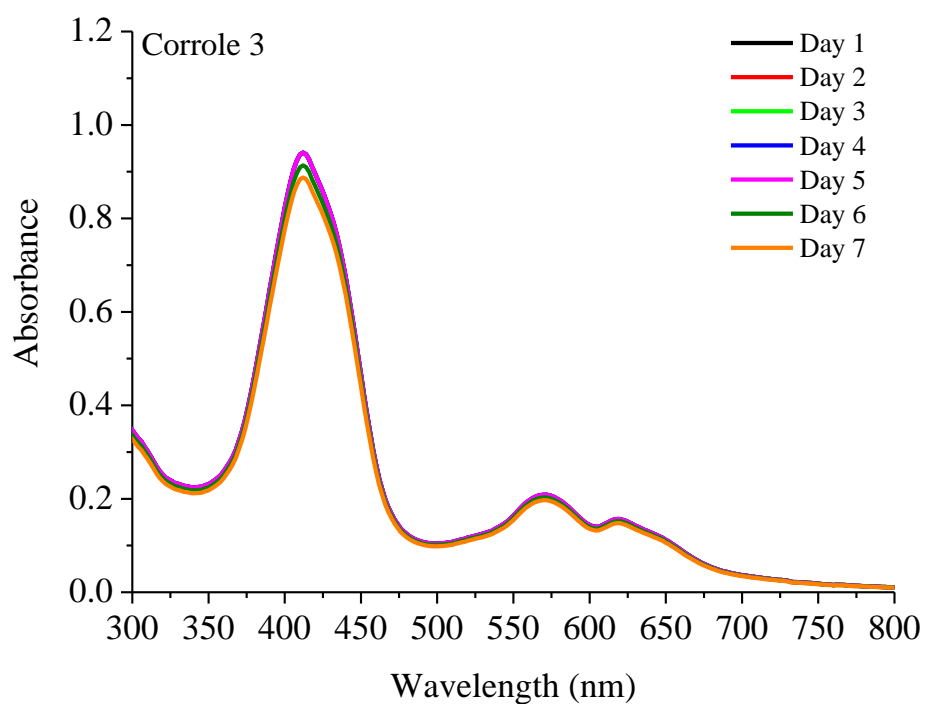

**Figure S45.** Stability assay of corrole 3 in DMSO(5%)/Tris-HCl pH 7.4 buffered mixture solution.

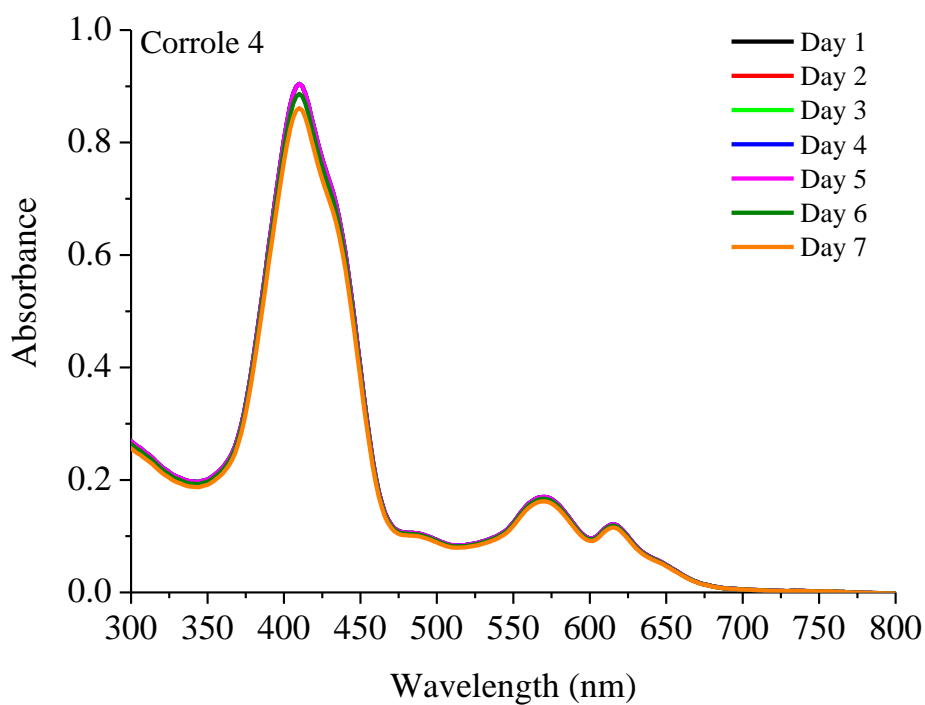

**Figure S46.** Stability assay of corrole 4 in DMSO(5%)/Tris-HCl pH 7.4 buffered mixture solution.

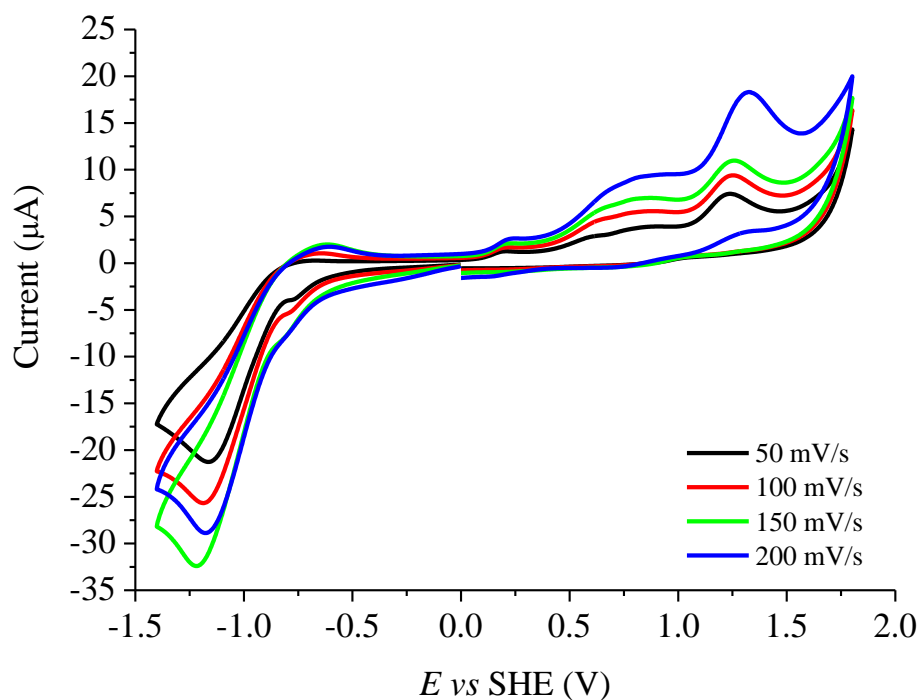

**Figure S47.** Cyclic voltammetry analysis of corrole **1** in dry DCM solution, using 0.1 M TBAPF<sub>6</sub> as support electrolyte.

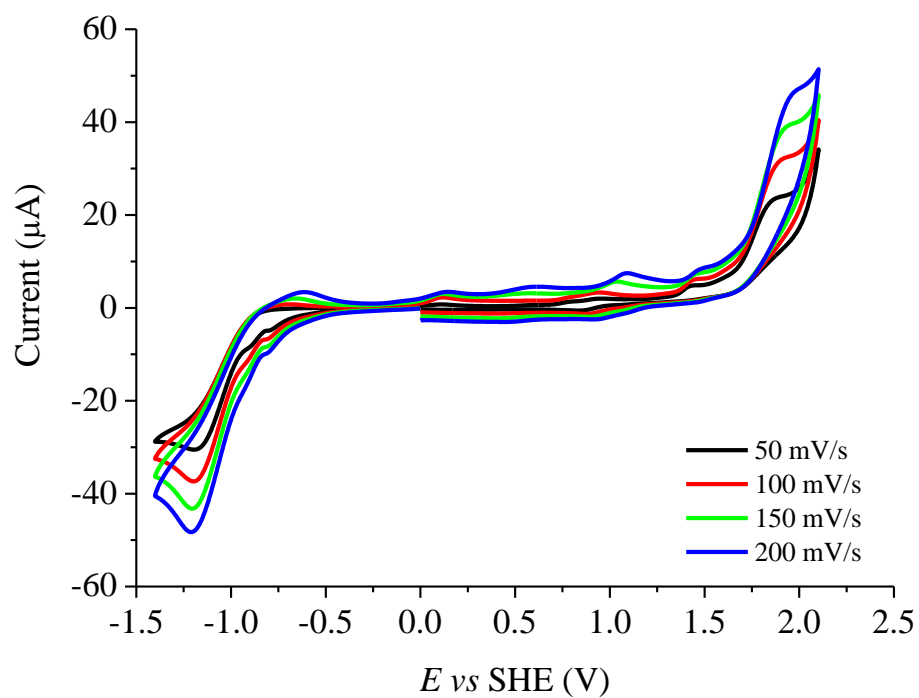

**Figure S48.** Cyclic voltammetry analysis of corrole **2** in dry DCM solution, using 0.1 M TBAPF<sub>6</sub> as support electrolyte.

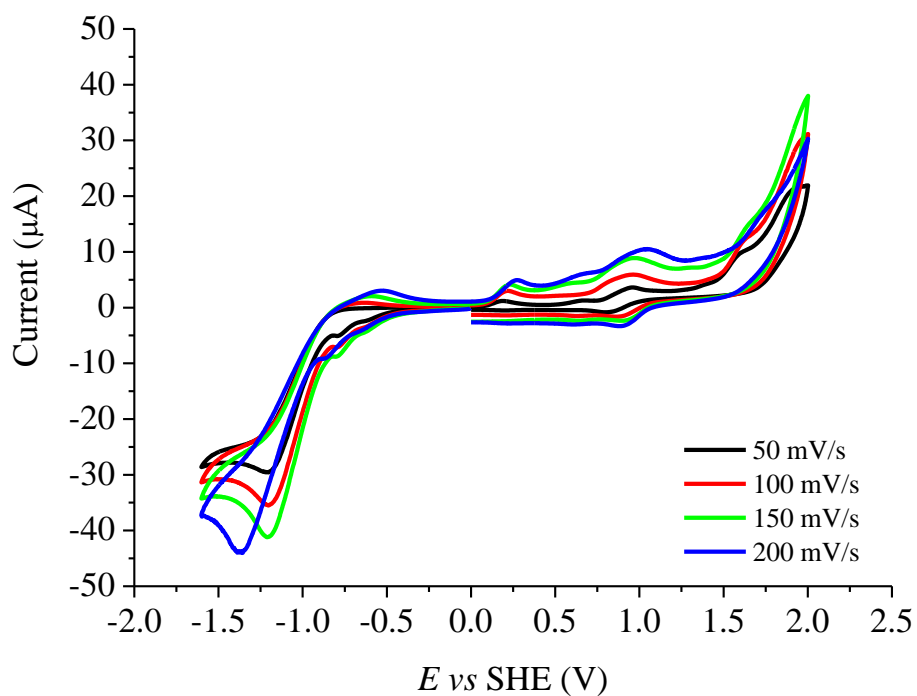

**Figure S49.** Cyclic voltammetry analysis of corrole **3** in dry DCM solution, using 0.1 M TBAPF<sub>6</sub> as support electrolyte.

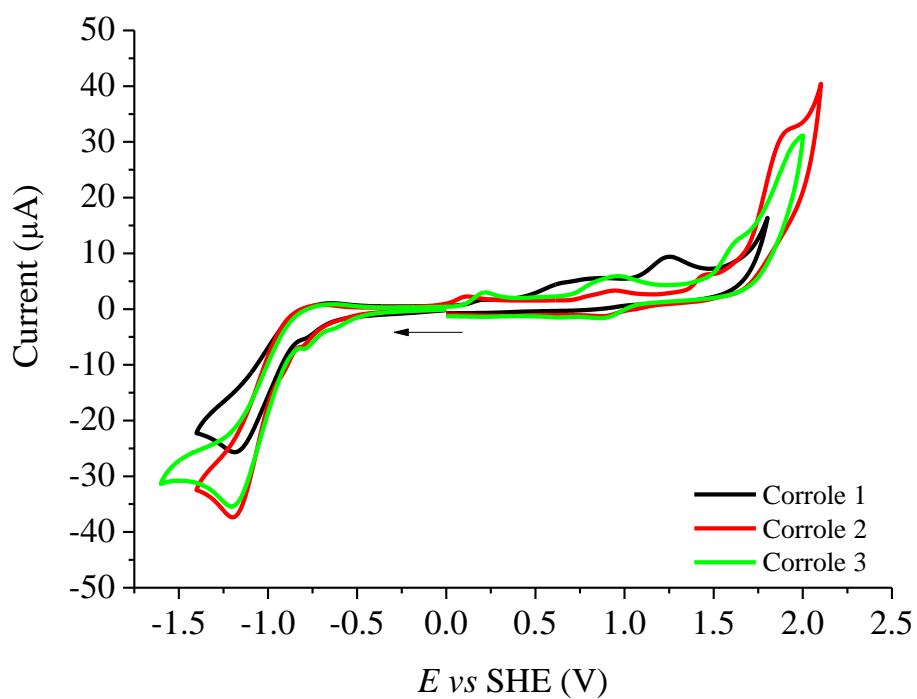

**Figure S50.** Cyclic voltammetry analysis of corrole **4** in dry DCM solution, using 0.1 M TBAPF<sub>6</sub> as support electrolyte.

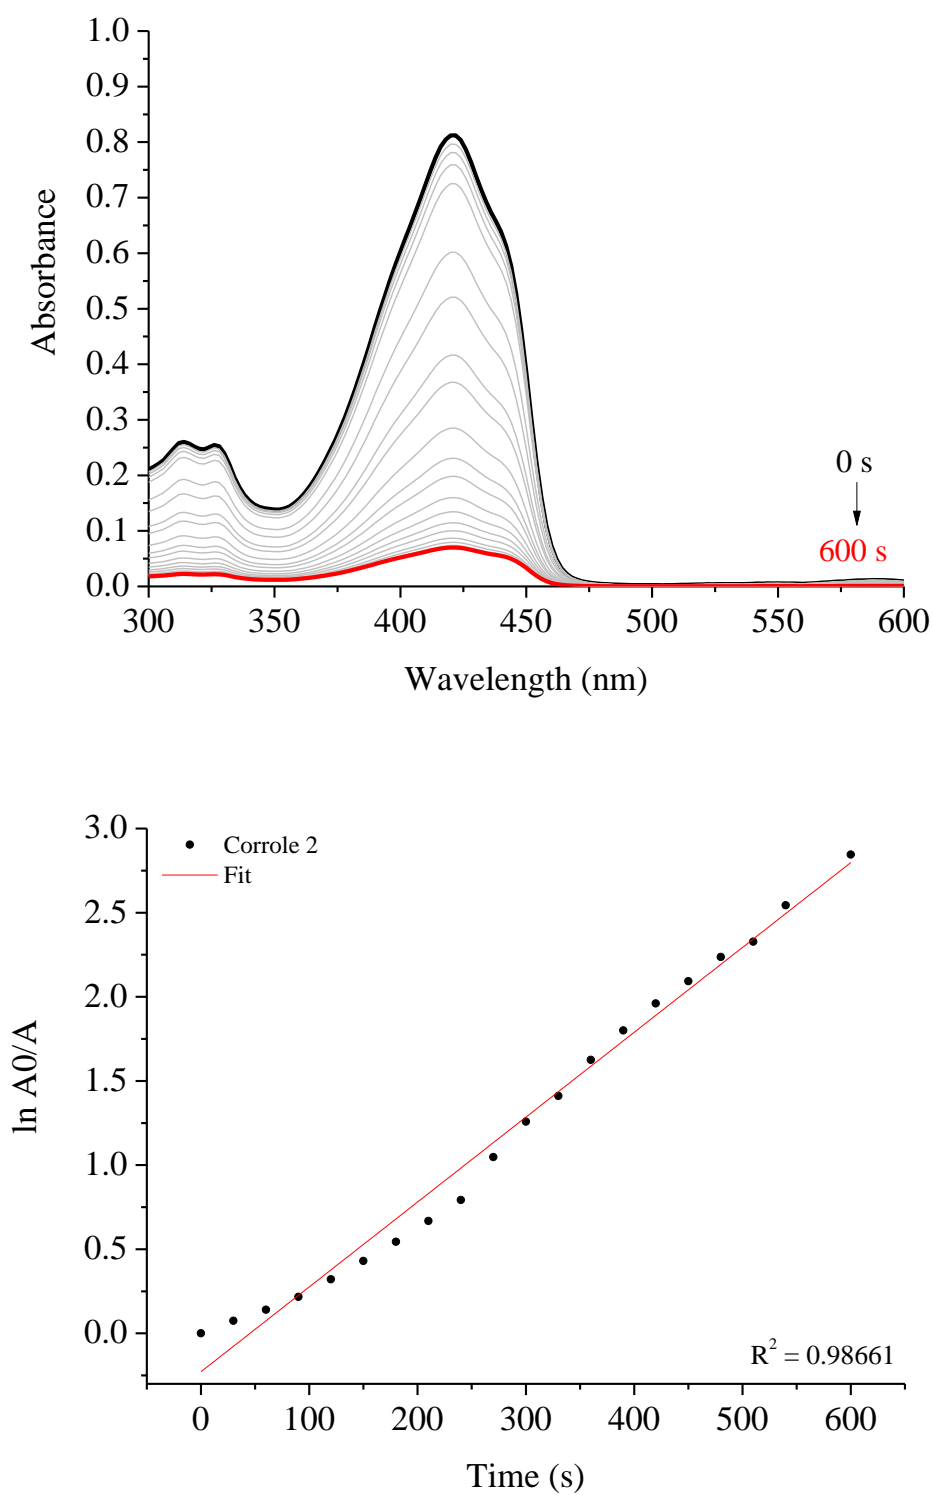

**Figure S51.** (up) DPBF photo-oxidation assay of corrole **2** in DMSO solution, by red-light irradiation source at 600 s and (down)  $\ln A_0/A$  versus time plot.

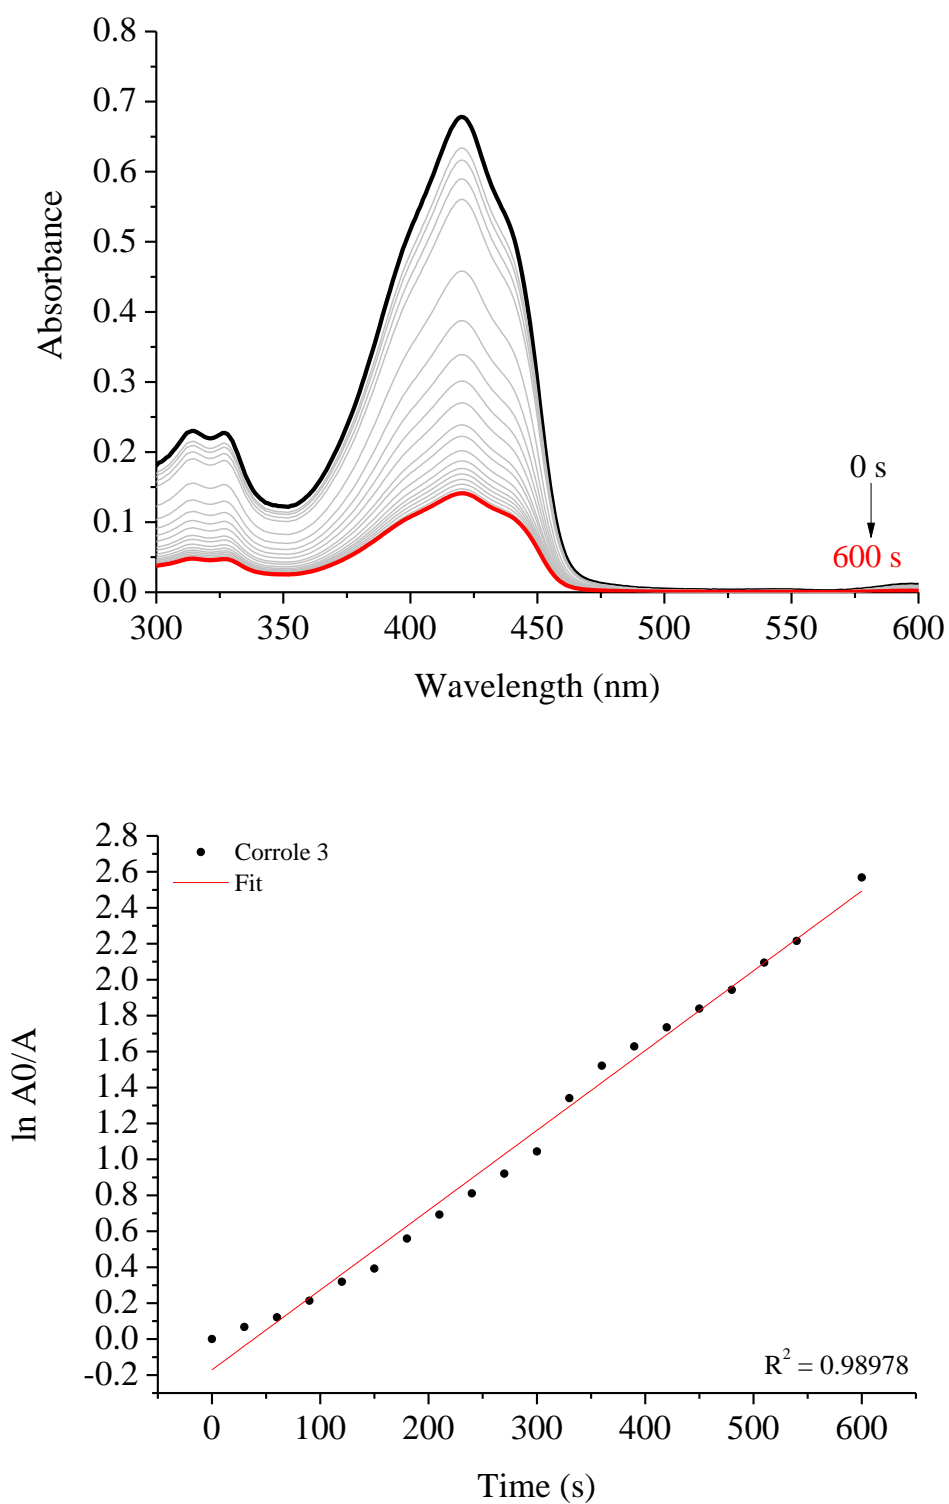

**Figure S52.** (up) DPBF photo-oxidation assay of corrole **3** in DMSO solution, by red-light irradiation source at 600 s and (down)  $\ln A_0/A$  versus time plot.



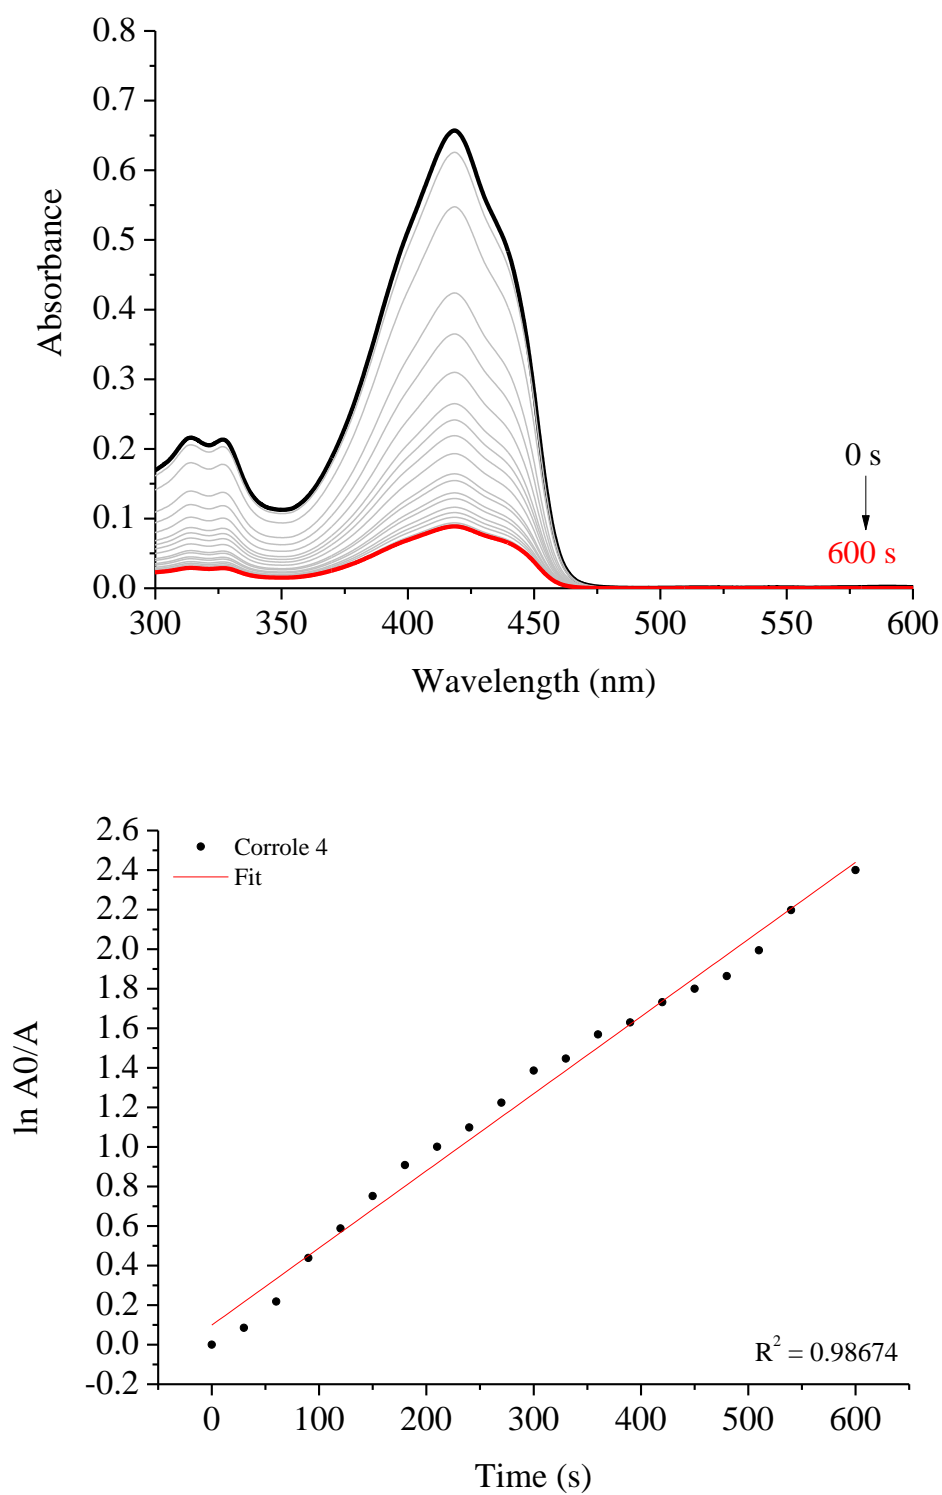

**Figure S53.** (up) DPBF photo-oxidation assay of corrole 4 in DMSO solution, by red-light irradiation source at 600 s and (down)  $\ln A_0/A$  versus time plot.

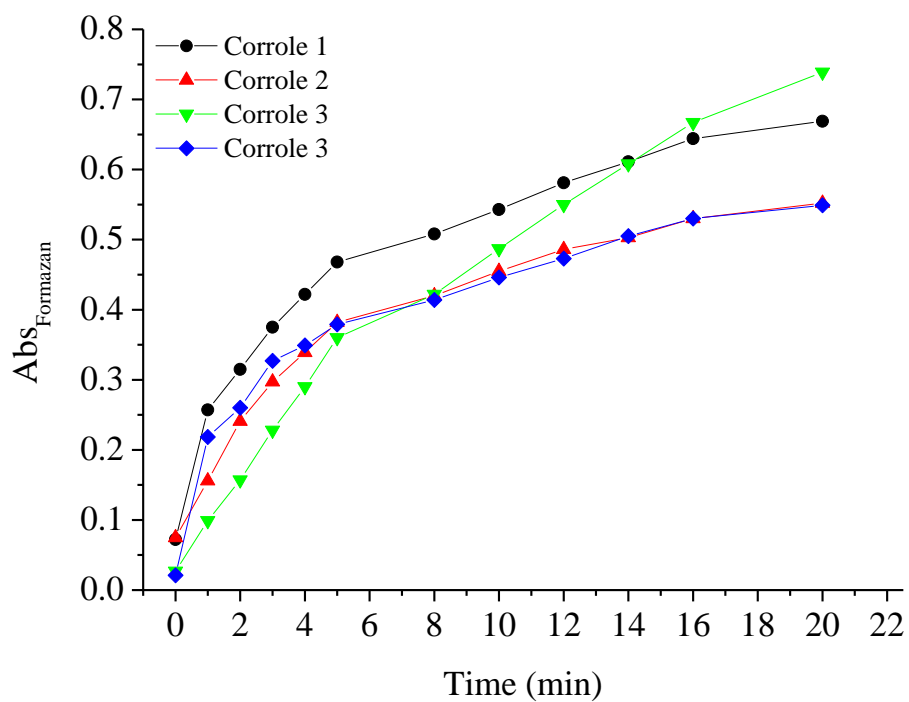

**Figure S54.** NBT reduction assay of corroles **1-4** in DMSO solution, by white-light irradiation source at 20 min.

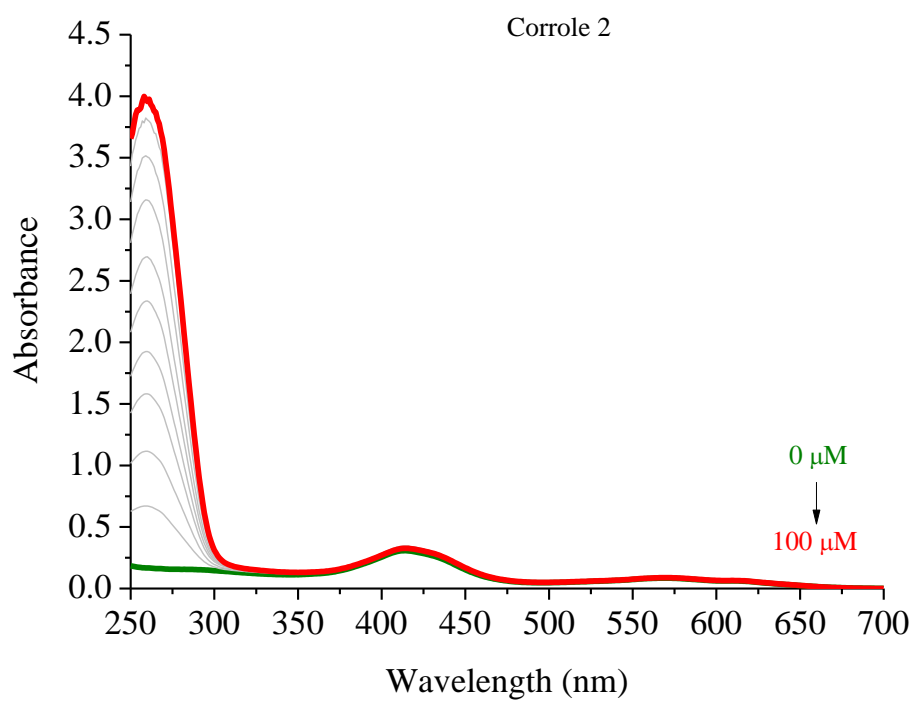

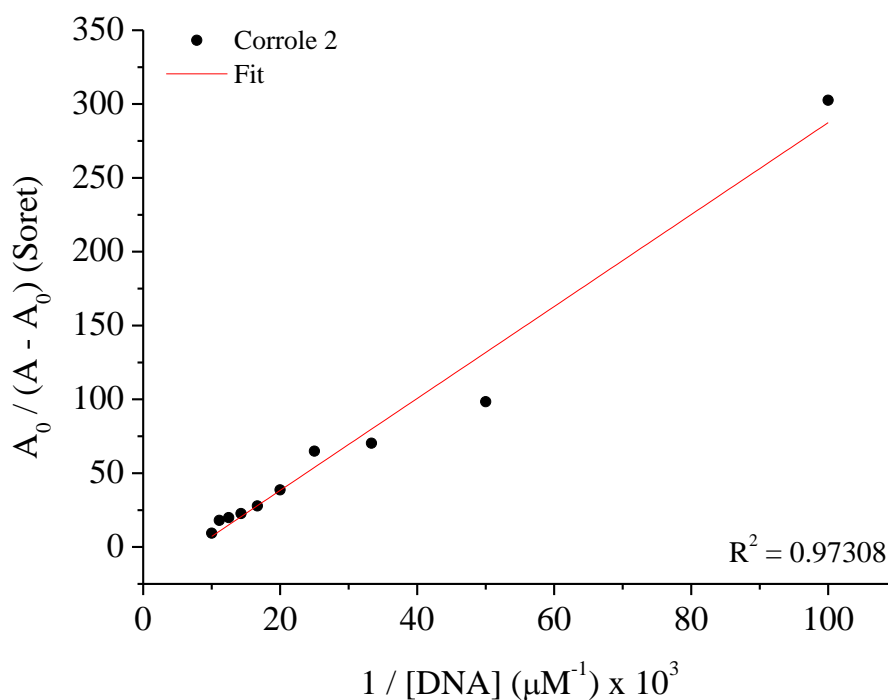

**Figure S55.** (up) UV-Vis spectra of the corrole **2** upon successive additions of CT-DNA concentrations (0 to 100  $\mu\text{M}$ ) in DMSO(5%)/Tris-HCl pH 7.4 mixture buffered solution. (down) Benesi-Hildebrandt plots of  $A_0 / (A - A_0)$  versus  $1 / [\text{CT-DNA}]$ .

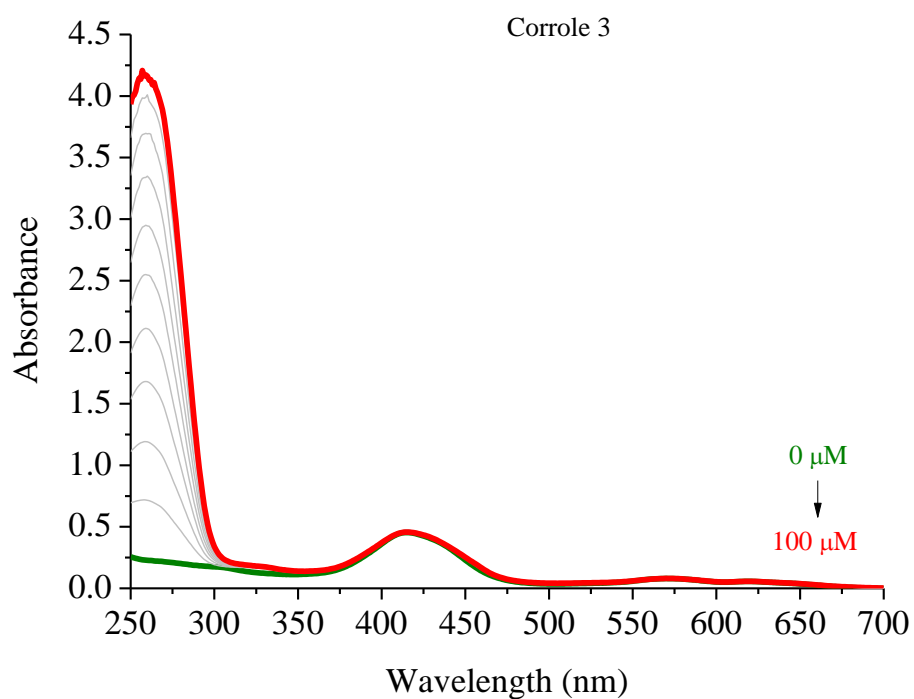

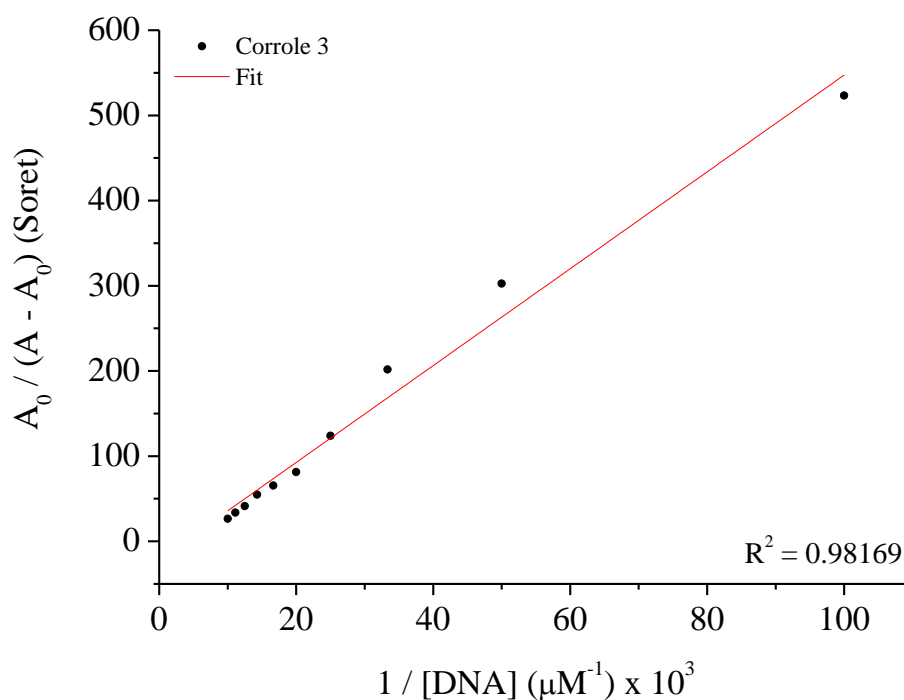

**Figure S56.** (up) UV-Vis spectra of the corrole **3** upon successive additions of CT-DNA concentrations (0 to 100  $\mu\text{M}$ ) in DMSO(5%)/Tris-HCl pH 7.4 mixture buffered solution. (down) Benesi-Hildebrandt plots of  $A_0 / (A - A_0)$  versus  $1 / [\text{CT-DNA}]$ .

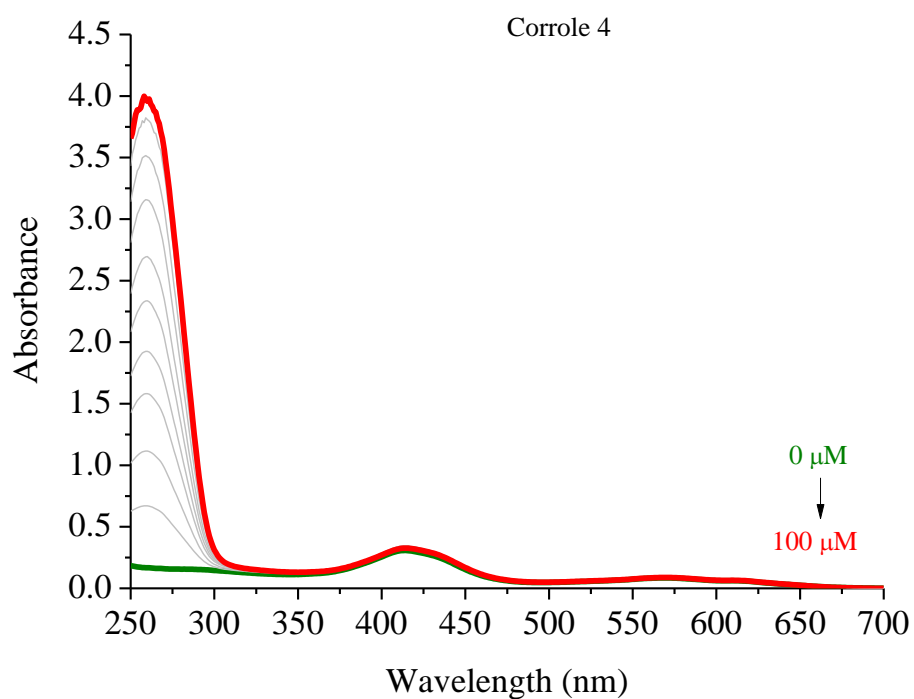

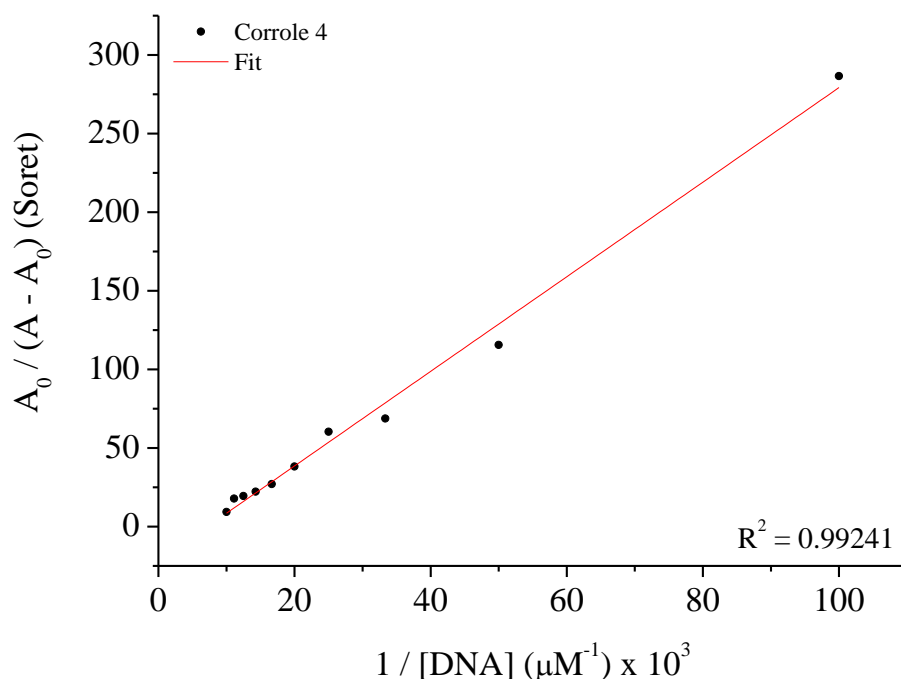

**Figure S57.** (up) UV-Vis spectra of the corrole **4** upon successive additions of CT-DNA concentrations (0 to 100  $\mu\text{M}$ ) in DMSO(5%)/Tris-HCl pH 7.4 mixture buffered solution. (down) Benesi-Hildebrandt plots of  $A_0 / (A - A_0)$  versus  $1 / [\text{CT-DNA}]$ .

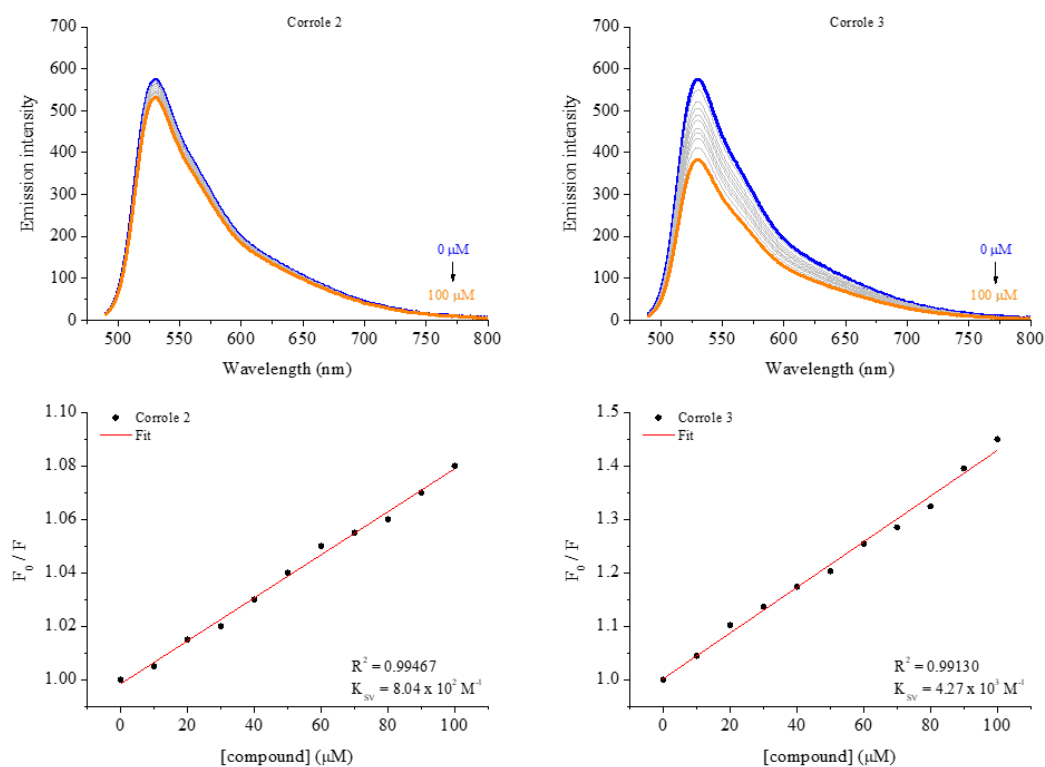

**Figure S58.** Steady-state fluorescence emission spectra for AO:DNA without and in the presence of corroles **2** and **3**, in DMSO(5%)/Tris-HCl pH 7.4 mixture buffered solution. Graphs shows the plot  $F_0 / F$  versus [corrole]. [corrole] = 0–100  $\mu\text{M}$ .

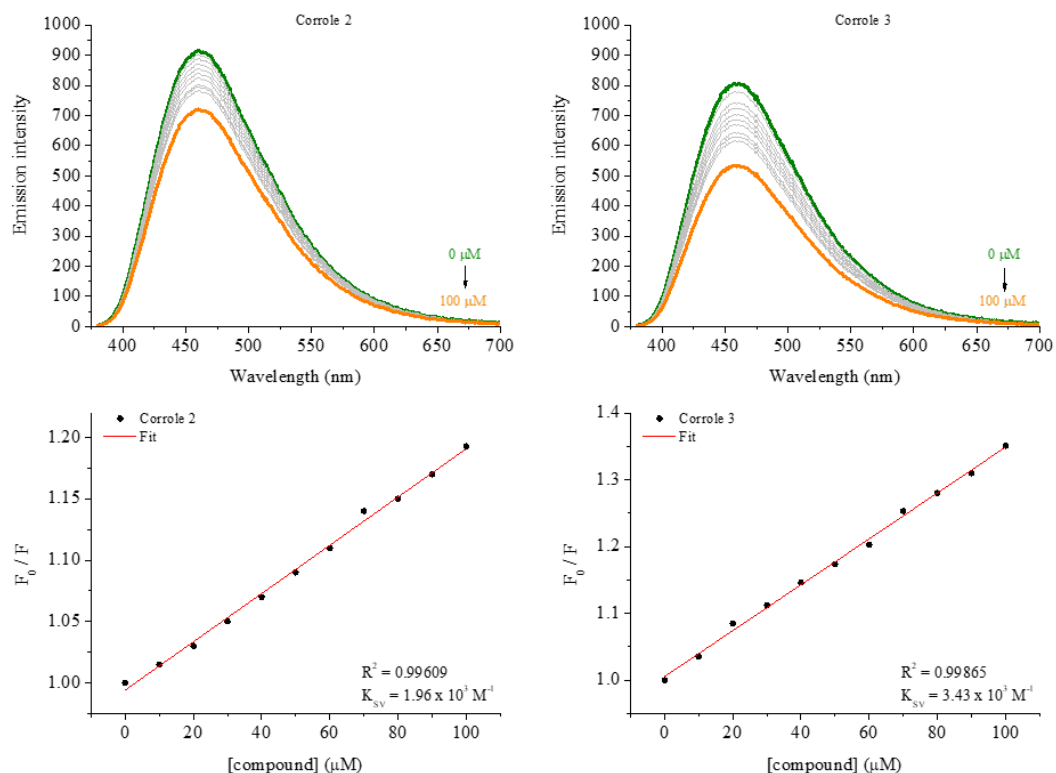

**Figure S59.** Steady-state fluorescence emission spectra for DAPI:DNA without and in the presence of corroles **2** and **3**, in DMSO(5%)/Tris-HCl pH 7.4 mixture buffered solution. Graphs shows the plot  $F_0/F$  versus [corrole]. [corrole] = 0–100  $\mu\text{M}$ .

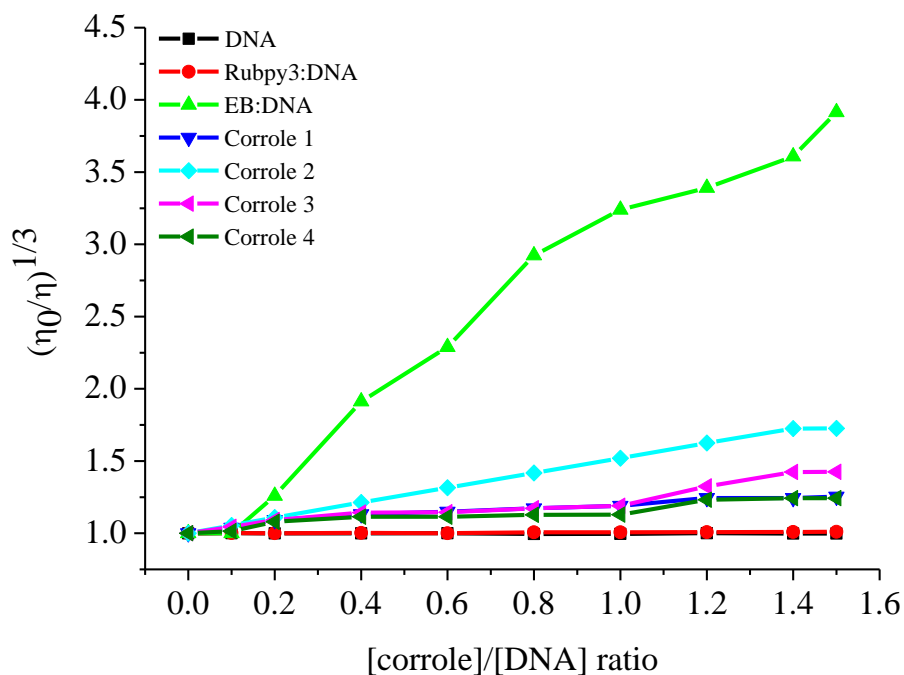

**Figure S60.** Viscosimetry assay of CT-DNA without and in the presence of corroles **1-4**, in DMSO(5%)/Tris-HCl pH 7.4 mixture buffered solution.

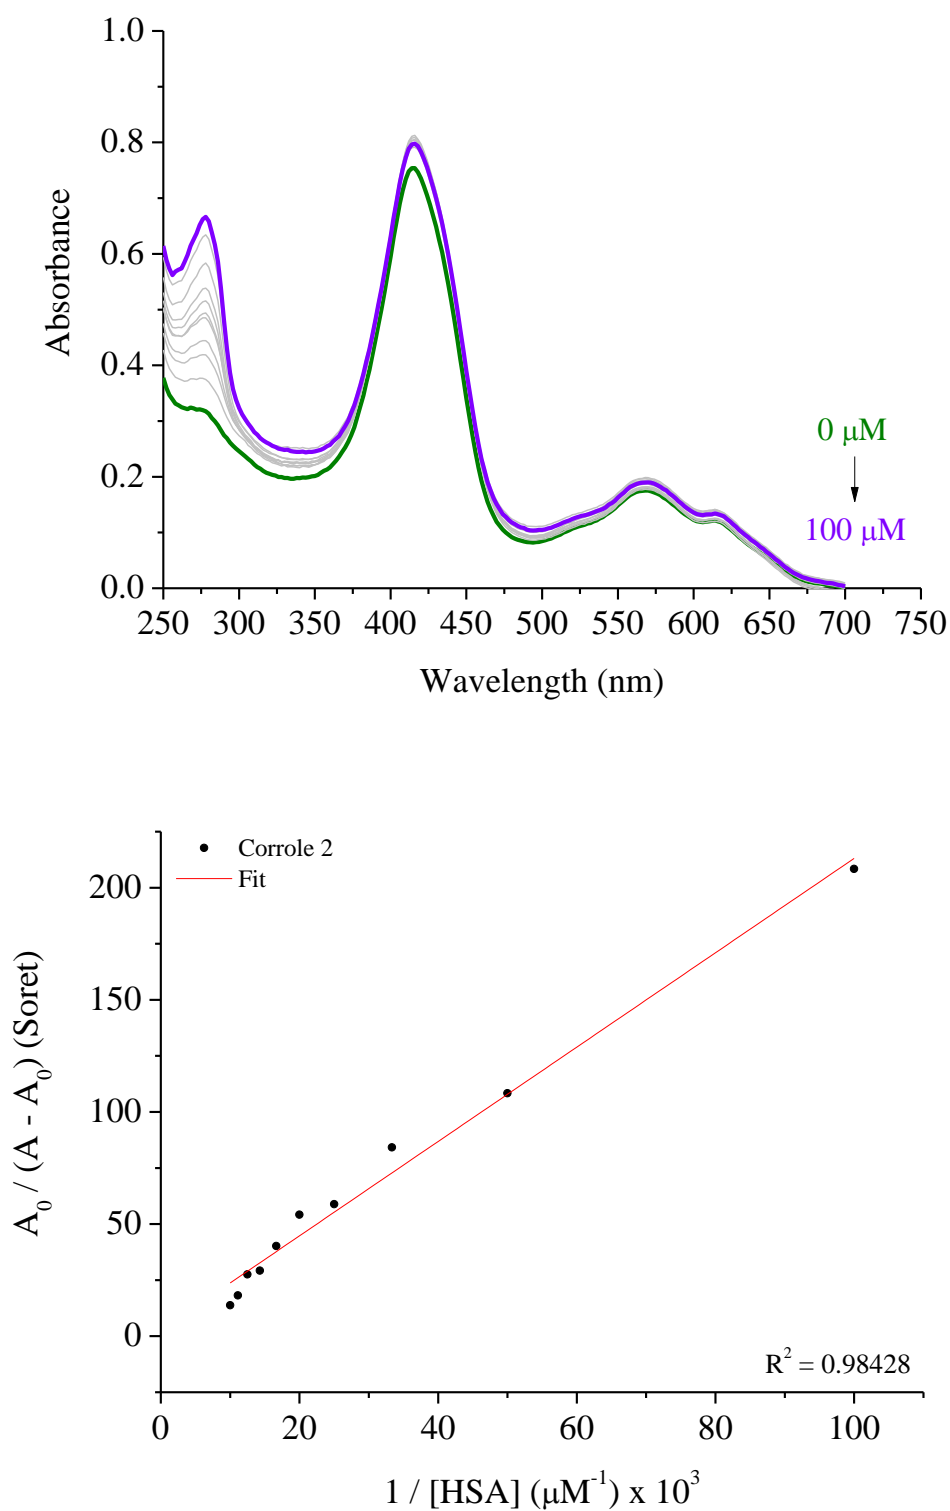

**Figure S61.** (up) UV-Vis spectra of the corrole 2 upon successive additions of HSA concentrations (0 to 100  $\mu\text{M}$ ) in DMSO(5%)/Tris-HCl pH 7.4 mixture buffered solution. (down) Benesi-Hildebrandt plots of  $A_0 / (A - A_0)$  versus  $1 / [\text{HSA}]$ .

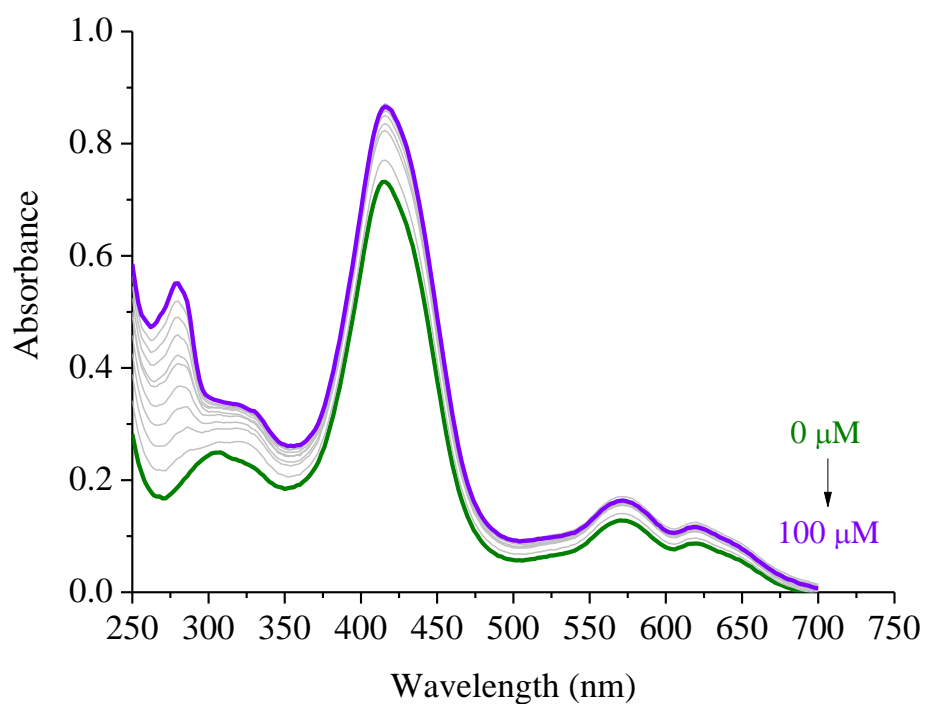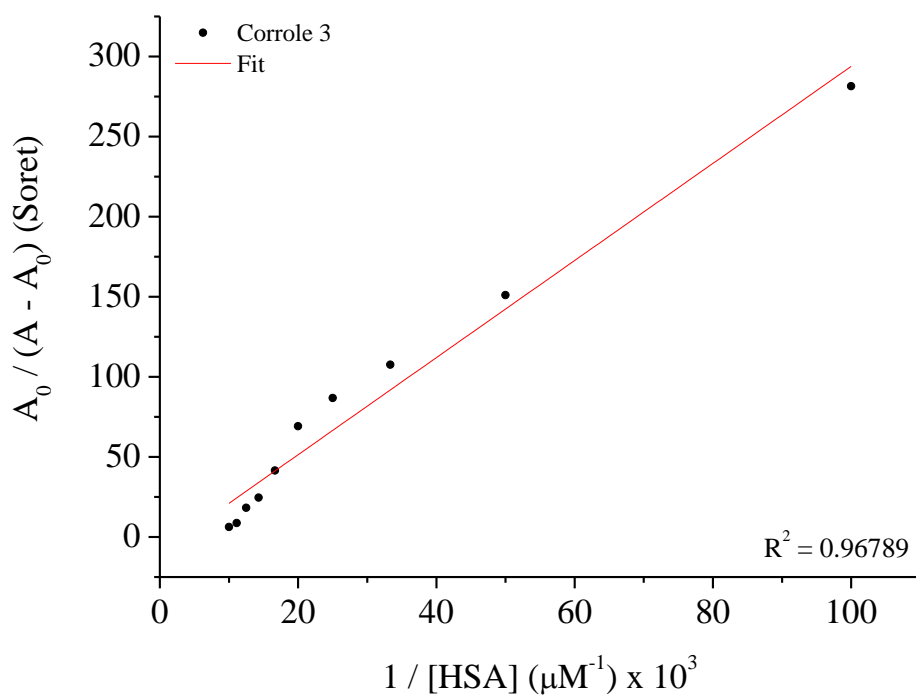

**Figure S62.** (up) UV-Vis spectra of the corrole **3** upon successive additions of HSA concentrations (0 to 100  $\mu\text{M}$ ) in DMSO(5%)/Tris-HCl pH 7.4 mixture buffered solution. (down) Benesi-Hidelbrandt plots of  $A_0 / (A - A_0)$  versus  $1 / [\text{HSA}]$ .



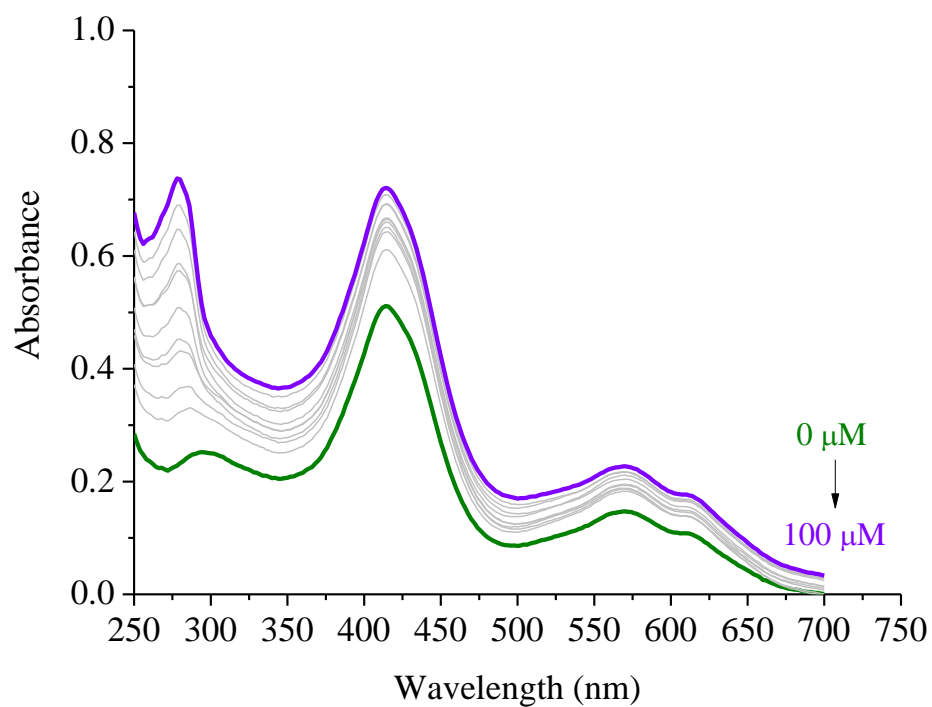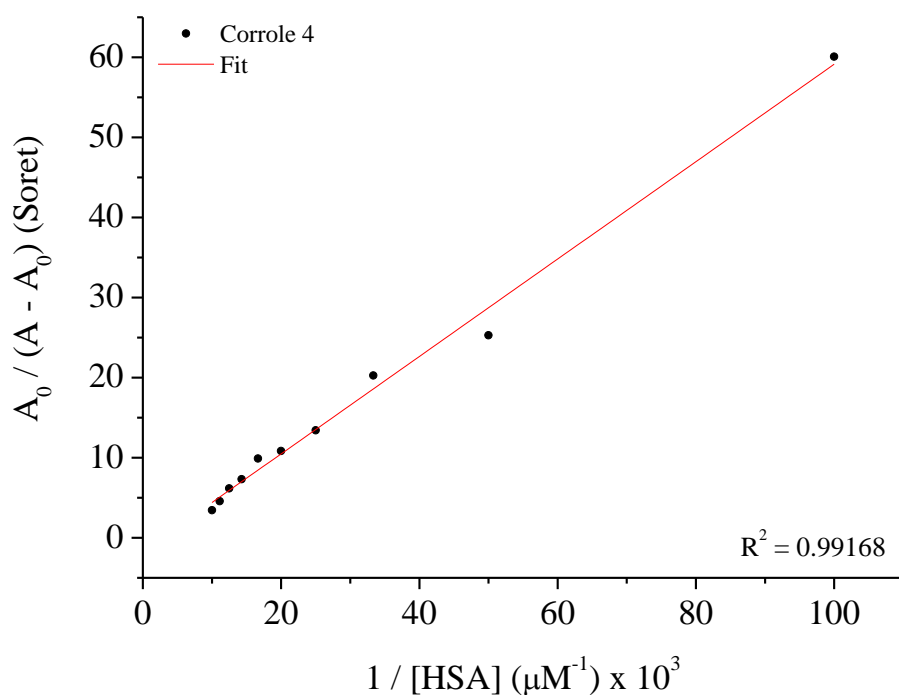

**Figure S63.** **(up)** UV-Vis spectra of the corrole **4** upon successive additions of HSA concentrations (0 to 100  $\mu\text{M}$ ) in DMSO(5%)/Tris-HCl pH 7.4 mixture buffered solution. **(down)** Benesi-Hidelandt plots of  $A_0 / (A - A_0)$  versus  $1 / [\text{HSA}]$ .

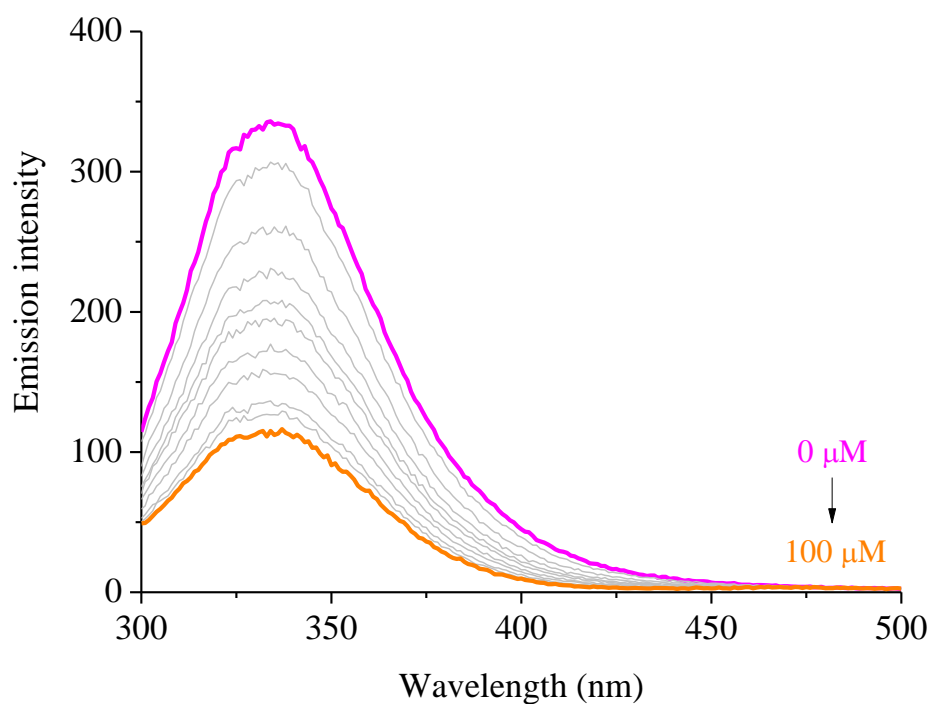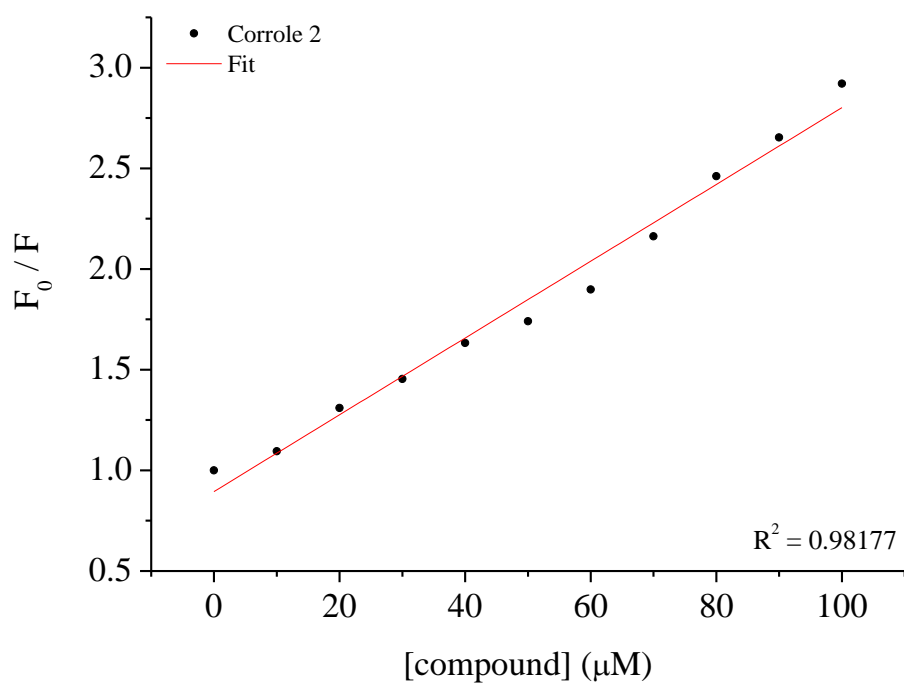

**Figure S64.** Steady-state fluorescence emission spectra for HSA without and in the presence of corrole 2, in in DMSO(5%)/Tris-HCl pH 7.4 mixture buffered solution. Graph shows the plot  $F_0/F$  versus [corrole]. [corrole] = 0–100  $\mu\text{M}$ .

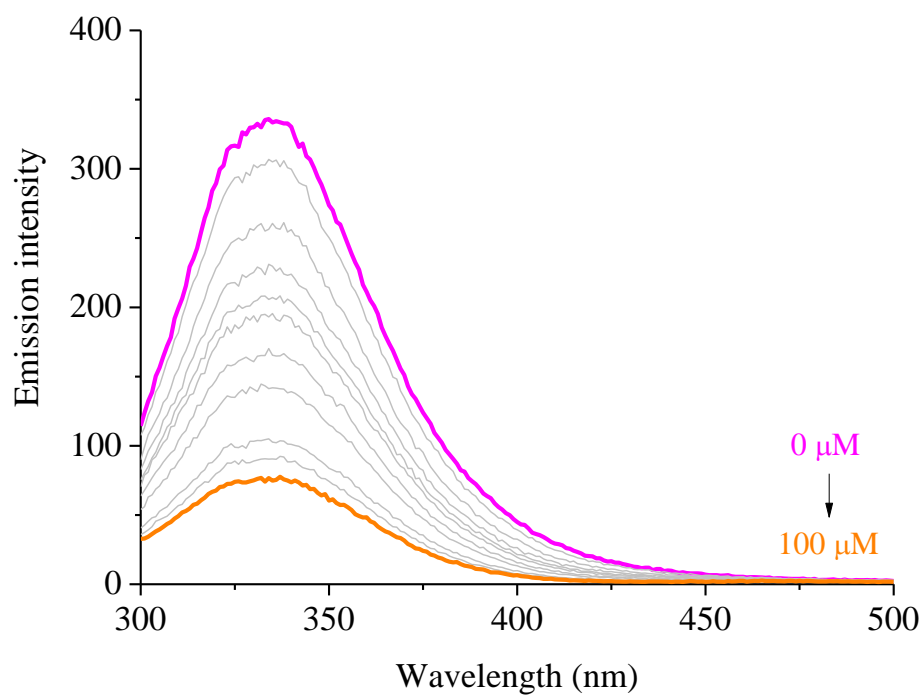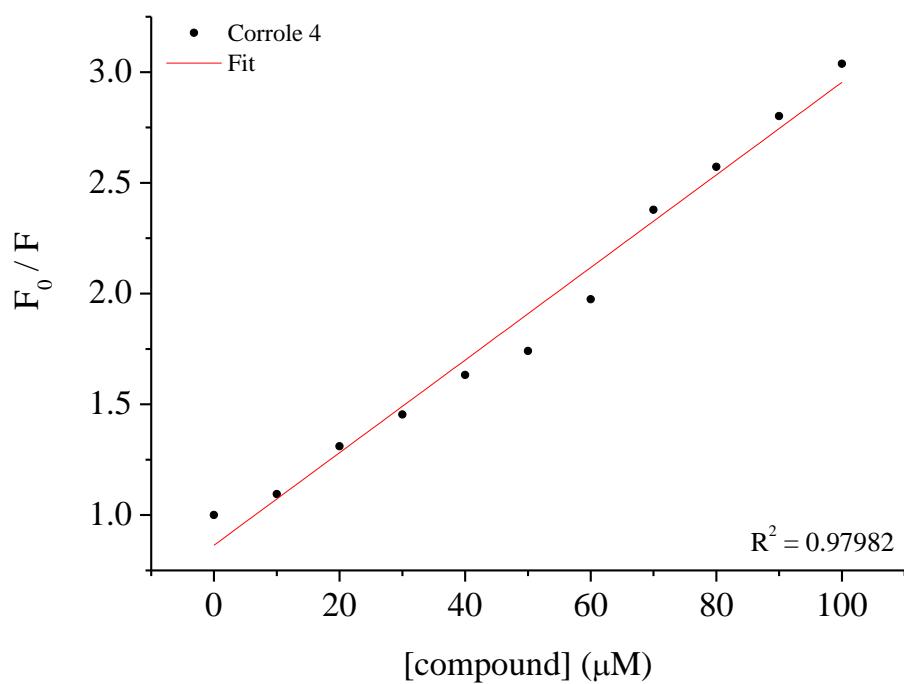

**Figure S65.** Steady-state fluorescence emission spectra for HSA without and in the presence of corrole 4, in in DMSO(5%)/Tris-HCl pH 7.4 mixture buffered solution. Graph shows the plot  $F_0/F$  versus [corrole]. [corrole] = 0–100  $\mu\text{M}$ .

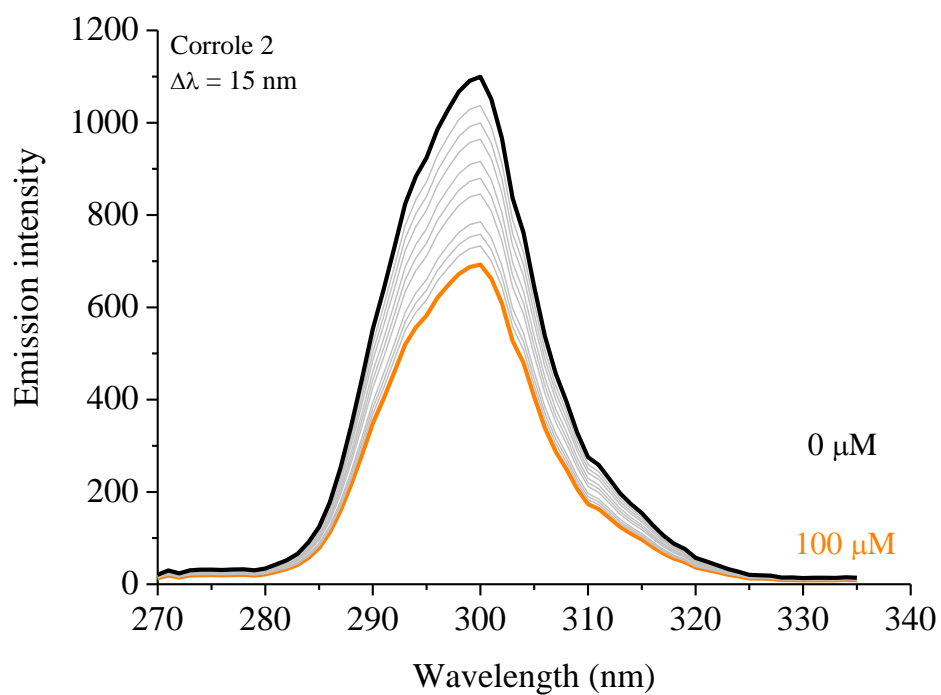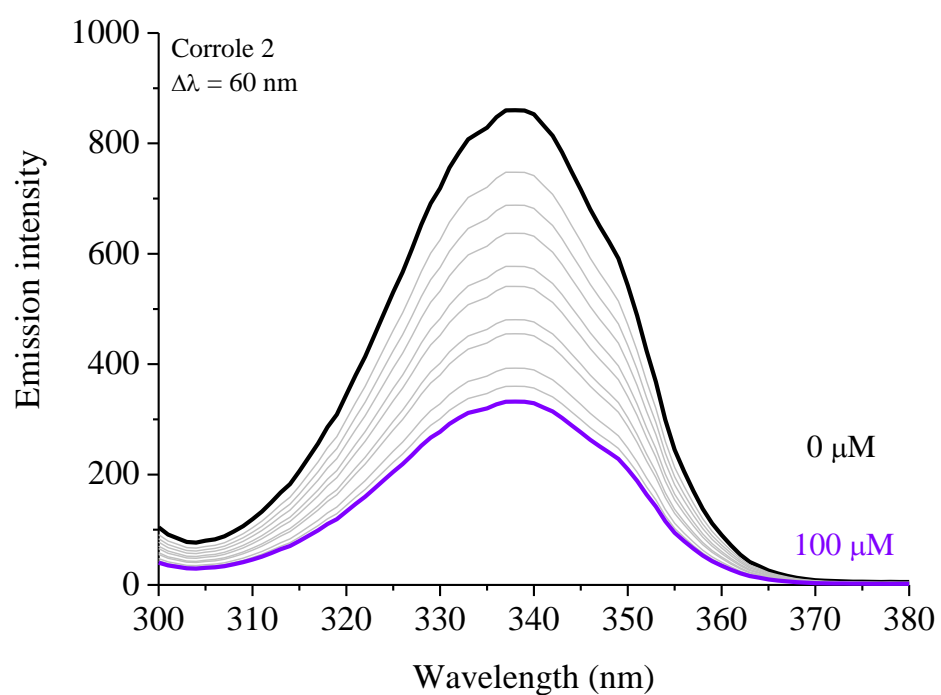

**Figure S66.** SF fluorescence emission spectra for HSA without and in the presence of corrole 2, in DMSO(5%)/Tris-HCl pH 7.4 mixture buffered solution, when (up)  $\Delta\lambda = 15 \text{ nm}$  and (down)  $\Delta\lambda = 60 \text{ nm}$ .

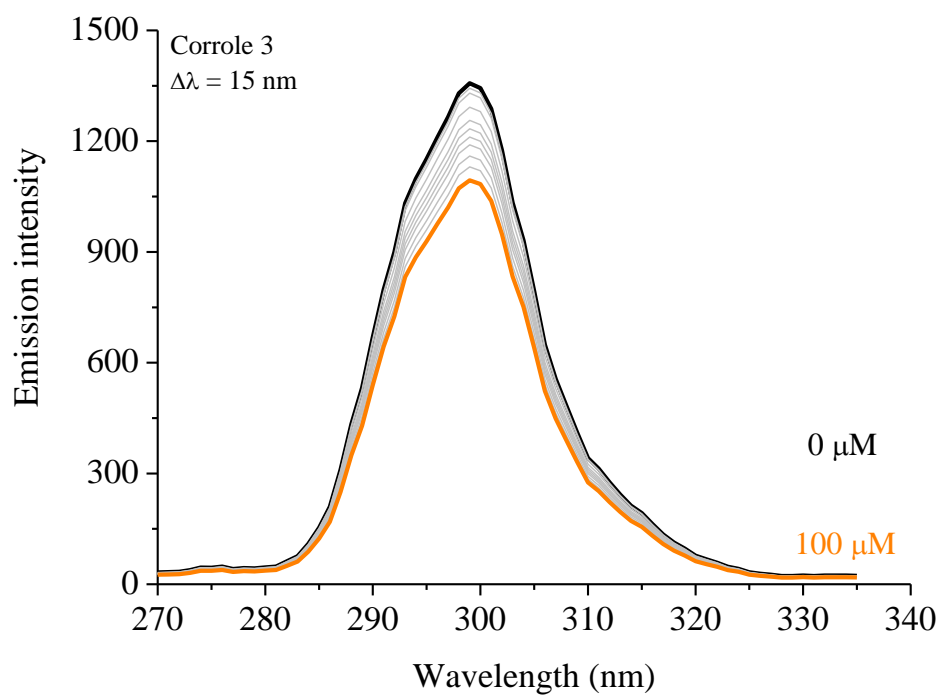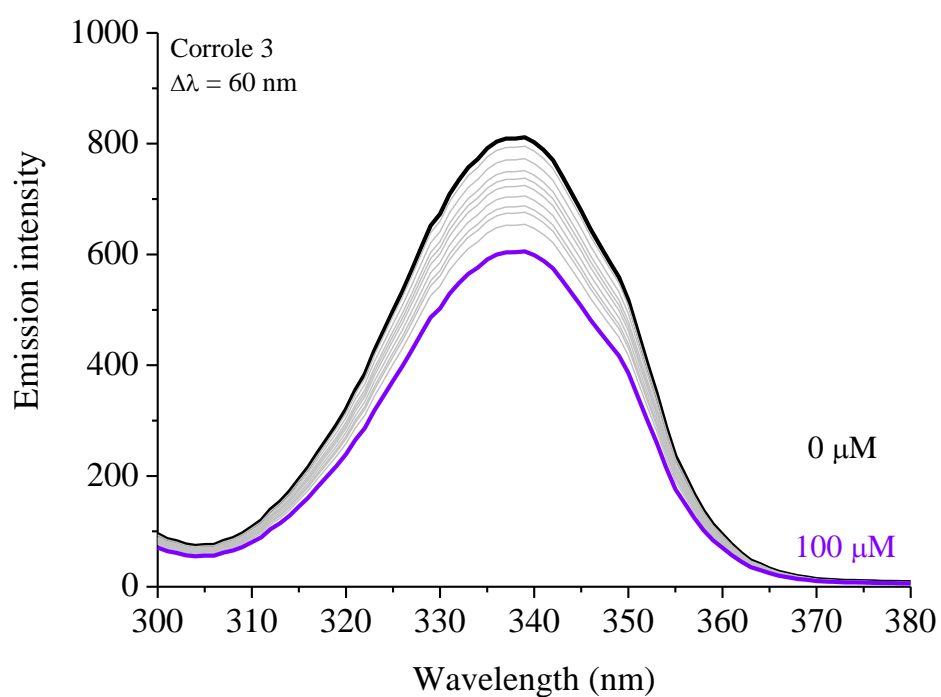

**Figure S67.** SF fluorescence emission spectra for HSA without and in the presence of corrole **3**, in DMSO(5%)/Tris-HCl pH 7.4 mixture buffered solution, when (up)  $\Delta\lambda = 15 \text{ nm}$  and (down)  $\Delta\lambda = 60 \text{ nm}$ .

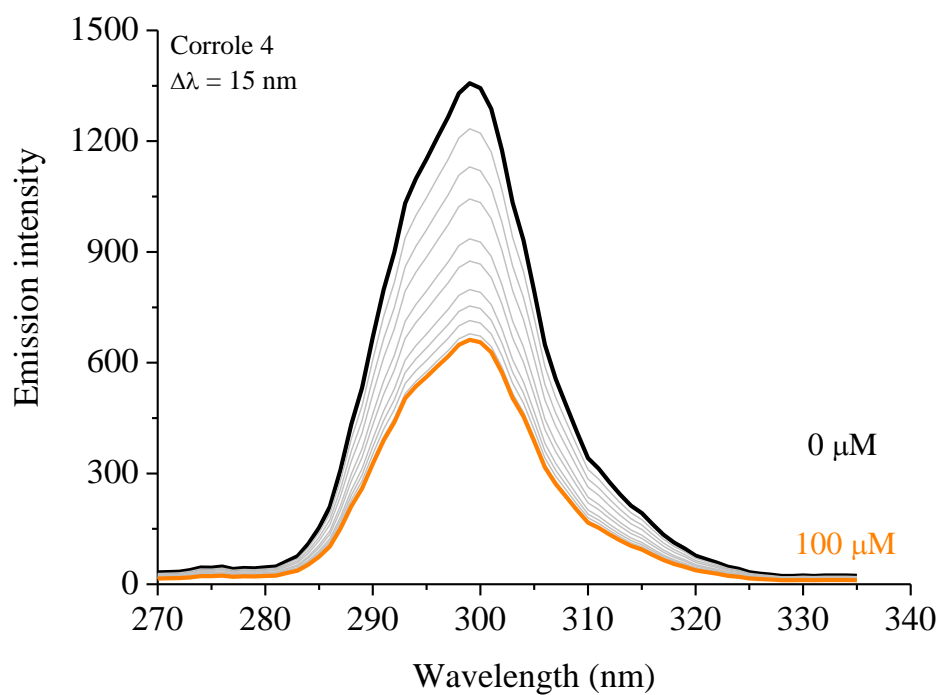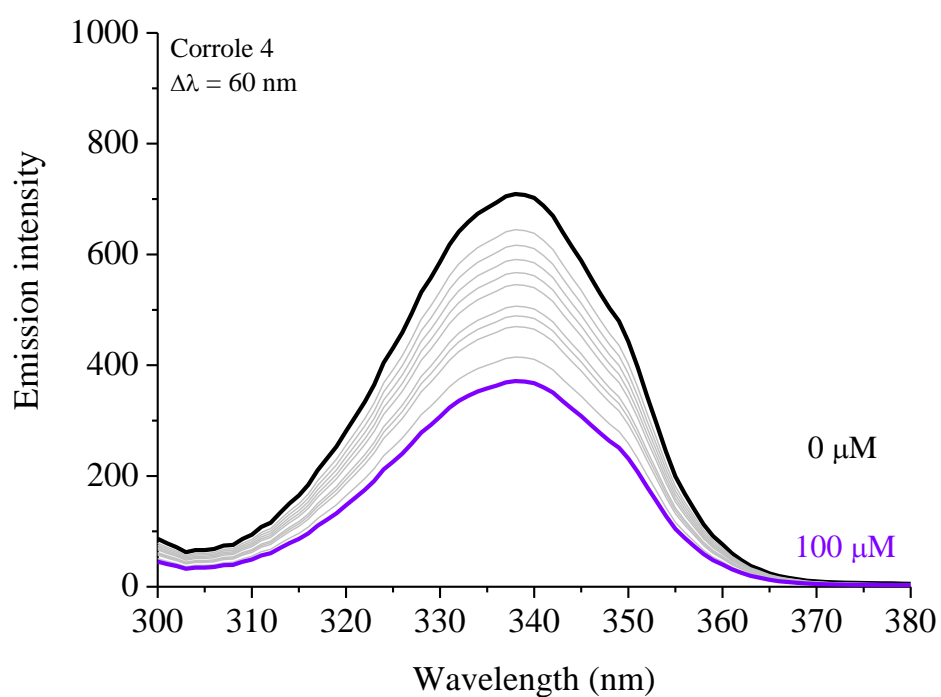

**Figure S68.** SF fluorescence emission spectra for HSA without and in the presence of corrole 4, in DMSO(5%)/Tris-HCl pH 7.4 mixture buffered solution, when (up)  $\Delta\lambda = 15 \text{ nm}$  and (down)  $\Delta\lambda = 60 \text{ nm}$ .

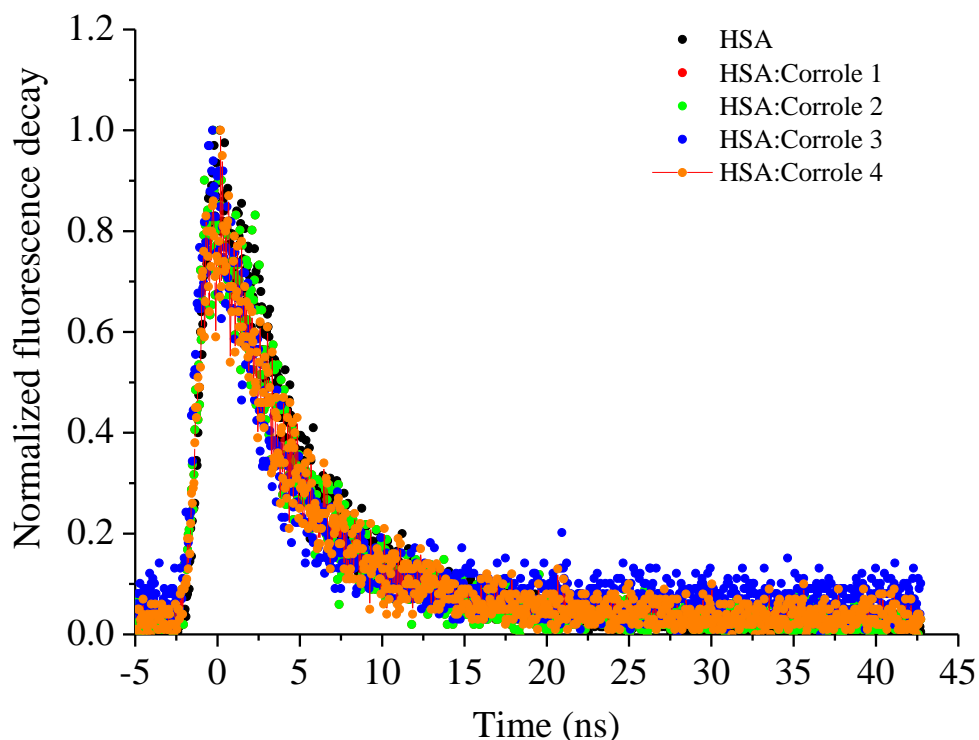

**Figure S69.** Normalized fluorescence decays of HSA in DMSO(5%)/Tris-HCl pH 7.4 mixture buffered solution, in the absence or in the presence of corroles **1-4**.

**Table S1.** The absorption wavelengths,  $\lambda$  (nm), and the oscillator strengths,  $f$ , of the two main peaks of the Soret and Q-bands of the tautomeric state T1, in DMSO solvent, for the studied corrole compounds.

|           | Soret          |        |                |        | Q              |        |                |        |
|-----------|----------------|--------|----------------|--------|----------------|--------|----------------|--------|
|           | $\lambda$ (nm) | $f$    |
| Corrole 1 | 357.36         | 1.4144 | 373.24         | 1.3183 | 544.99         | 0.1032 | 562.68         | 0.2926 |
| Corrole 2 | 358.76         | 1.4011 | 375.81         | 1.3708 | 547.06         | 0.1053 | 564.06         | 0.2893 |
| Corrole 3 | 360.69         | 1.3770 | 381.29         | 1.4022 | 554.05         | 0.0842 | 575.62         | 0.3195 |
| Corrole 4 | 361.38         | 1.3800 | 382.45         | 1.5170 | 552.76         | 0.0793 | 573.38         | 0.3105 |

**Table S2.** The absorption wavelengths,  $\lambda$  (nm), and the oscillator strengths,  $f$ , of the two main peaks of the Soret and Q-bands of the tautomeric state T2, in DMSO solvent, for the studied corrole compounds.

|           | Soret          |        |                |        | Q              |        |                |        |
|-----------|----------------|--------|----------------|--------|----------------|--------|----------------|--------|
|           | $\lambda$ (nm) | $f$    |
| Corrole 1 | 366.45         | 1.4491 | 381.47         | 1.4273 | 533.03         | 0.0356 | 581.29         | 0.1634 |
| Corrole 2 | 368.48         | 1.4580 | 386.81         | 1.4265 | 538.55         | 0.0527 | 588.15         | 0.1885 |
| Corrole 3 | 370.57         | 1.4518 | 390.31         | 1.4458 | 543.60         | 0.0376 | 596.63         | 0.2187 |
| Corrole 4 | 371.36         | 1.4600 | 391.58         | 1.5509 | 542.74         | 0.0356 | 595.04         | 0.2077 |

**Table S3.** Fluorescence decay data of HSA in the absence or in the presence of corroles **1-4**.

| Corrole | tf (ns)          | $\chi^2$ |
|---------|------------------|----------|
| HSA:1   | $4.89 \pm 0.002$ | 1.03680  |
| HSA:2   | $4.77 \pm 0.002$ | 1.17756  |
| HSA:3   | $4.60 \pm 0.002$ | 0.95752  |
| HSA:4   | $4.60 \pm 0.002$ | 1.07678  |
| HSA     | $5.25 \pm 0.001$ | 1.13768  |

**Table S4.** Molecular docking results for the interaction between DNA:corroles in the minor groove.

| Corrole          | Nitrogenated bases | Interaction      | Distance (Å) |
|------------------|--------------------|------------------|--------------|
| <b>Corrole 2</b> | DG-04              | Van der Waals    | 1.50         |
|                  | DA-05              | Van der Waals    | 2.30         |
|                  | DT-20              | Van der Waals    | 3.70         |
|                  | DC-21              | Van der Waals    | 3.40         |
|                  | DG-22              | Hydrogen bonding | 3.20         |
| <b>Corrole 3</b> | DG-04              | Van der Waals    | 2.80         |
|                  | DA-05              | Van der Waals    | 1.70         |
|                  | DA-06              | Hydrogen bonding | 1.90         |
|                  | DT-20              | Hydrogen bonding | 3.10         |
|                  | DC-21              | Van der Waals    | 2.00         |
|                  | DG-22              | Hydrogen bonding | 3.20         |
| <b>Corrole 4</b> | DG-02              | Hydrogen bonding | 3.60         |
|                  | DC-23              | Van der Waals    | 3.40         |
|                  | DG-22              | Van der Waals    | 2.80         |
|                  | DG-04              | Van der Waals    | 1.40         |
|                  | DC-21              | Van der Waals    | 3.80         |
|                  | DA-05              | Van der Waals    | 2.40         |
|                  | DT-20              | Van der Waals    | 3.30         |

**Table S5.** Molecular docking results for the interaction between HSA:corroles for the corresponding main binding site.

| Corrole          | Amino acid residue | Interaction      | Distance (Å) |
|------------------|--------------------|------------------|--------------|
| <b>Corrole 2</b> | Lys-195            | Hydrogen bonding | 2.90         |
|                  | Lys-199            | Van der Waals    | 1.50         |
|                  | Trp-214            | Van der Waals    | 2.80         |
|                  | Arg-222            | Hydrogen bonding | 3.00         |
|                  | His-242            | Van der Waals    | 3.10         |
|                  | Cys-245            | Van der Waals    | 2.80         |
|                  | Arg-257            | Hydrogen bonding | 3.70         |
|                  | Ala-291            | Van der Waals    | 3.40         |
|                  | Glu-292            | Van der Waals    | 2.20         |
|                  | Val-343            | Van der Waals    | 2.40         |



|                  |         |                  |      |
|------------------|---------|------------------|------|
|                  | Arg-114 | Hydrogen bonding | 3.70 |
|                  | Leu-115 | Van der Waals    | 3.60 |
|                  | Arg-117 | Van der Waals    | 1.40 |
| <b>Corrole 3</b> | Ile-142 | Van der Waals    | 1.50 |
| <b>Corrole 4</b> | His-146 | Van der Waals    | 3.40 |
|                  | Tyr-161 | Hydrogen bonding | 2.60 |
|                  | Leu-182 | Van der Waals    | 2.40 |
|                  | Arg-186 | Van der Waals    | 3.20 |
|                  | Lys-190 | Van der Waals    | 2.70 |
